# Supplementary material for: Direct access to stabilized CuI using cuttlebone as a natural-reducing support for efficient CuAAC click reactions in water
Source: Royal Society of Chemistry journal article supplement (doi:10.1039/c6ra13314b), 2016-01-01
Supplement: c6ra13314b1.pdf [file c6ra13314b1.pdf]

## Supplementary Information

### **Direct access to stabilized Cu<sup>I</sup> using cuttlebone as a natural-reducing support for efficient CuAAC click reactions in water**

Sara S. E. Ghodsinia, Batool Akhlaghinia\*, Roya Jahanshahi

*Department of Chemistry, Faculty of Sciences, Ferdowsi University of Mashhad, Mashhad  
9177948974, Iran.*

## Experimental

### *General*

The purity determinations of the products and the progress of the reactions were accomplished by TLC on silica gel polygram STL G/UV 254 plates. The melting points of the products were determined with an Electrothermal Type 9100 melting point apparatus. The FT-IR spectra were recorded on pressed KBr pellets using an AVATAR 370 FT-IR spectrometer (Thermo Nicolet spectrometer, USA) at room temperature in the range between 4000 and 400  $\text{cm}^{-1}$  with a resolution of 4  $\text{cm}^{-1}$ , and each spectrum was the average of 32 scans. NMR spectra were recorded on a NMR Bruker Avance spectrometer at 400 and 300 MHz in  $\text{CDCl}_3$  as solvent in the presence of tetramethylsilane as the internal standard and the coupling constants ( $J$  values) are given in Hz. Elemental analyses were performed using a Thermo Finnigan Flash EA 1112 Series instrument (furnace: 900 °C, oven: 65 °C, flow carrier: 140  $\text{mL min}^{-1}$ , flow reference: 100  $\text{mL min}^{-1}$ ). Mass spectra were recorded with a CH7A Varianmat Bremem instrument at 70 eV electron impact ionization, in  $m/z$  (rel %). Elemental compositions were determined with an SC7620 Energy-dispersive X-ray analysis (EDX) presenting a 133 eV resolution at 20 kV. Surface analysis spectroscopy of the catalyst was performed in an ESCA/AES system. This system was equipped with a concentric hemispherical (CHA) electron energy analyzer (Specs model EA10 plus) suitable for X-ray photoelectron spectroscopy (XPS). Inductively coupled plasma (ICP) was carried out on a Varian, VISTA-PRO, CCD, Australia and 76004555 SPECTRO ARCOS ICP-OES analyzer. All yields refer to isolated products after purification by recrystallization.

**1-Benzyl-4-phenyl-1*H*-1,2,3-triazole** (Table 3, Entry 1) (0.22 g, 95%); white solid (crystals); mp 127-128 °C (from EtOH) (Lit.<sup>1</sup> 128–129 °C); FT-IR (KBr):  $\nu_{\text{max}}/\text{cm}^{-1}$  3133, 3051, 2949, 1611, 1461 (CH<sub>2</sub>), 1443, 1427, 1352, 1222 (N–N=N–), 1188 (C–N), 1072, 1049, 972, 914, 816 (=C–H oop, triazole ring), 767, 720, 696, 581; <sup>1</sup>H NMR:  $\delta$ H (300 MHz; CDCl<sub>3</sub>; Me<sub>4</sub>Si) 7.83 (2 H, d,  $J$  = 7.65 Hz, Ar-H), 7.70 (1 H, s, C=CH), 7.44-7.38 (5 H, m, Ar-H), 7.36-7.29 (3 H, m, Ar-H), 5.58 (2 H, s, CH<sub>2</sub>); <sup>13</sup>C NMR:  $\delta$ C (75 MHz; CDCl<sub>3</sub>; Me<sub>4</sub>Si) 148, 134, 130, 129, 128.83, 128.79, 128.18, 128.07, 125, 119, 54; MS,  $m/z$  235 (M<sup>+</sup>, 13%), 234 (75, M – H), 206 (55, M – N<sub>2</sub>), 129 (63, M – C<sub>7</sub>H<sub>7</sub>N), 116 (95, M – C<sub>8</sub>H<sub>7</sub>N<sub>2</sub>), 104 (75, M – C<sub>8</sub>H<sub>6</sub>N<sub>2</sub>), 91 (100, M – C<sub>8</sub>H<sub>6</sub>N<sub>3</sub>), 77 (74, M – C<sub>9</sub>H<sub>8</sub>N<sub>3</sub>), 29 (50, M – C<sub>15</sub>H<sub>13</sub>N).

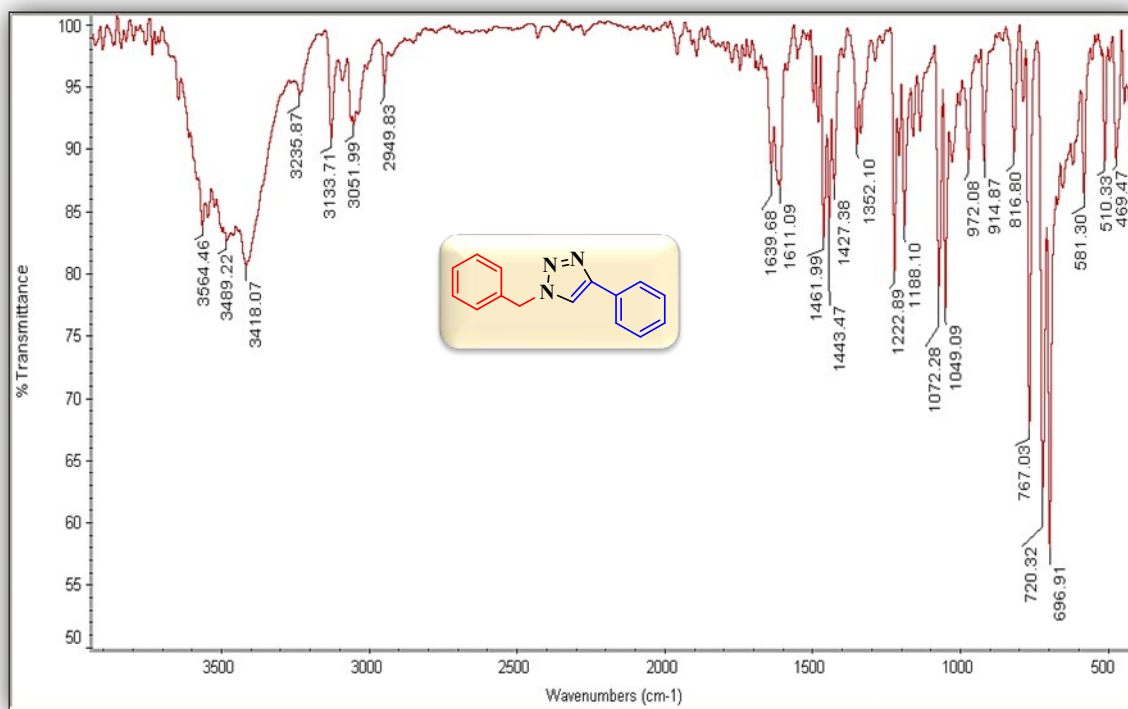

**Figure 1:** FT-IR (KBr) of 1-Benzyl-4-phenyl-1*H*-1,2,3-triazole (Table 3, Entry 1).

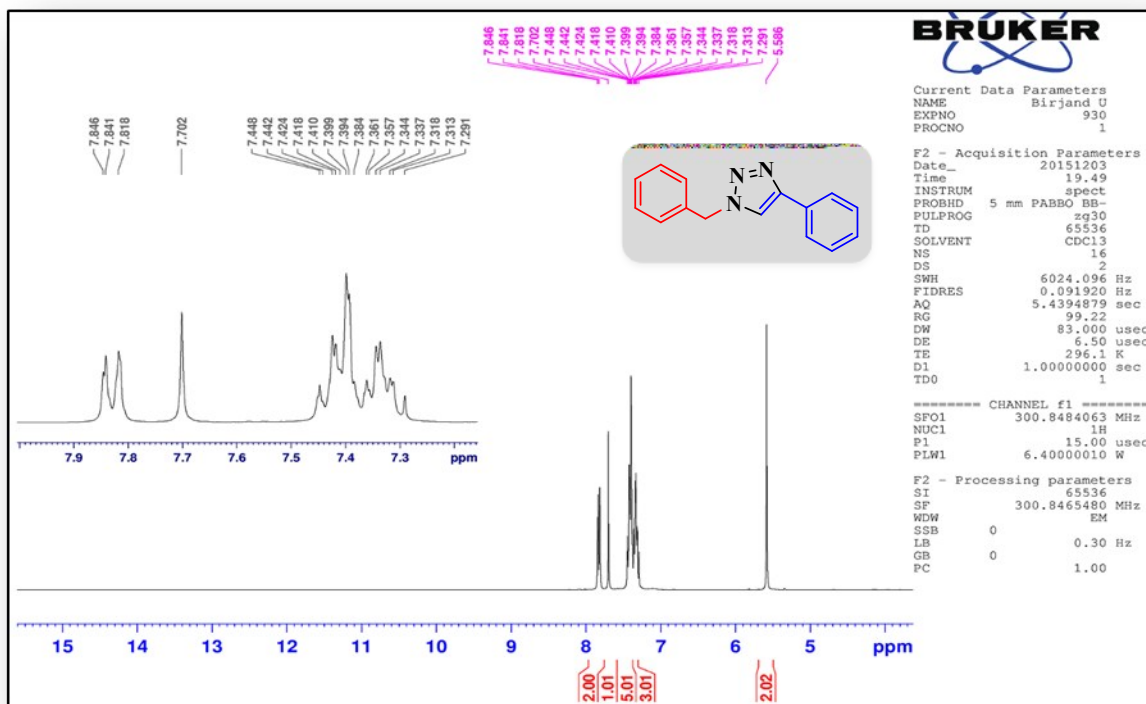

**Figure 2:**  $^1\text{H}$  NMR (300 MHz,  $\text{CDCl}_3$ ) of 1-Benzyl-4-phenyl-1*H*-1,2,3-triazole (Table 3, Entry 1).

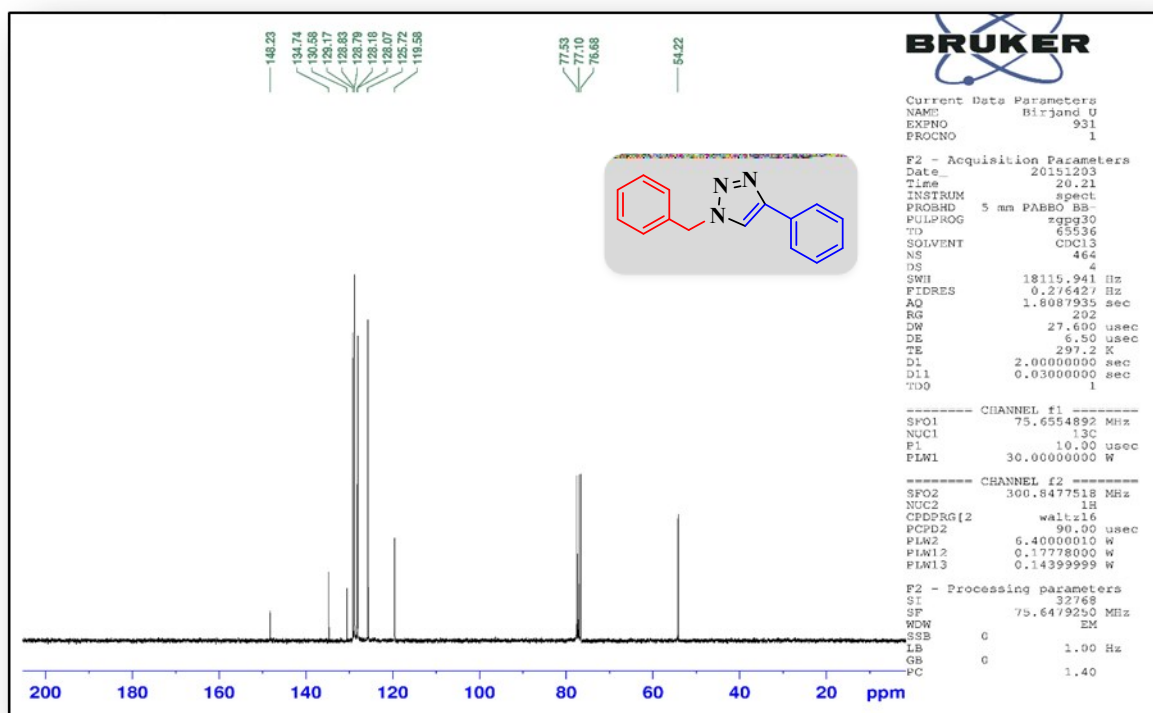

**Figure 3:**  $^{13}\text{C}$  NMR (75MHz,  $\text{CDCl}_3$ ) of 1-Benzyl-4-phenyl-1*H*-1,2,3-triazole (Table 3, Entry 1).

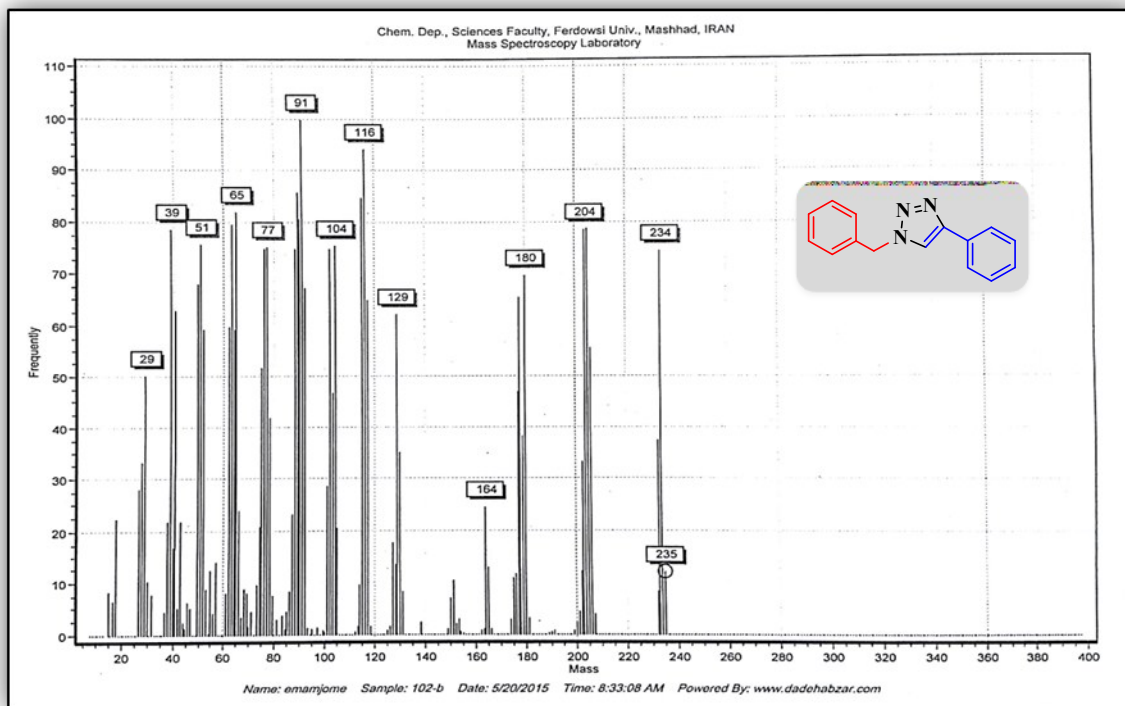

**Figure 4:** Mass spectrum of 1-Benzyl-4-phenyl-1*H*-1,2,3-triazole (Table 3, Entry 1). 1-Benzyl-4-(*p*-tolyl)-1*H*-1,2,3-triazole (Table 3, Entry 2) (0.23 g, 93%); white solid (crystals); mp 142-144 °C (from EtOH) (Lit.<sup>2</sup> 142–146 °C); FT-IR (KBr):  $\nu_{\max}/\text{cm}^{-1}$  3145, 3015, 2913, 1495, 1456 (CH<sub>2</sub>), 1431, 1347, 1222 (N–N=N–), 1180 (C–N), 1065, 1046, 976, 827 (=C–H oop, triazole ring), 793, 721, 583, 512; <sup>1</sup>H NMR:  $\delta$ H (300 MHz; CDCl<sub>3</sub>; Me<sub>4</sub>Si) 7.71 (2 H, d,  $J$  = 8.1 Hz, Ar-H), 7.65 (1 H, s, C=CH), 7.43-7.29 (5 H, m, Ar-H), 7.23 (2 H, d,  $J$  = 7.8 Hz, Ar-H), 5.59 (2 H, s, CH<sub>2</sub>), 2.39 (3 H, s, CH<sub>3</sub>); MS,  $m/z$  249 (M<sup>+</sup>, 3%), 248 (32, M – H), 247 (86, M – 2 H), 220 (70, M – N<sub>2</sub>), 130 (99, M – C<sub>8</sub>H<sub>8</sub>N), 115 (55, M – C<sub>7</sub>H<sub>7</sub>N<sub>3</sub>), 103 (86, M – C<sub>9</sub>H<sub>10</sub>N<sub>2</sub>), 91 (100, M – C<sub>9</sub>H<sub>8</sub>N<sub>3</sub>), 77 (86, M – C<sub>10</sub>H<sub>10</sub>N<sub>3</sub>), 28 (85, M – C<sub>16</sub>H<sub>15</sub>N).

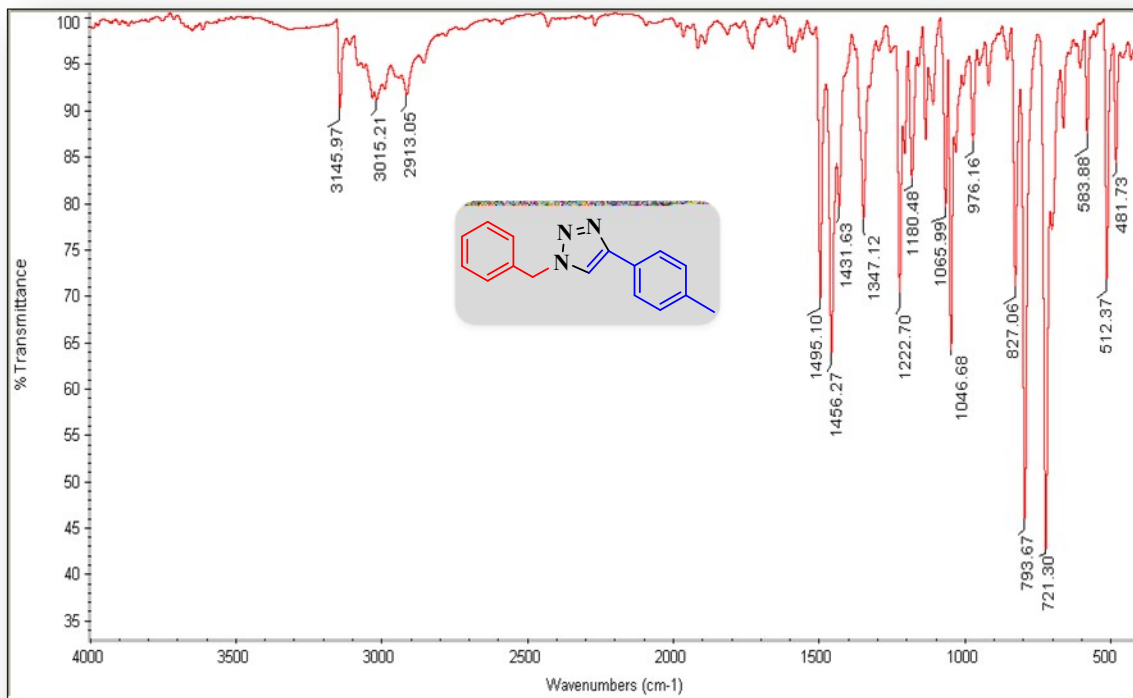

Figure 5: FT-IR (KBr) of 1-Benzyl-4-(*p*-tolyl)-1*H*-1,2,3-triazole (Table 3, Entry 2).

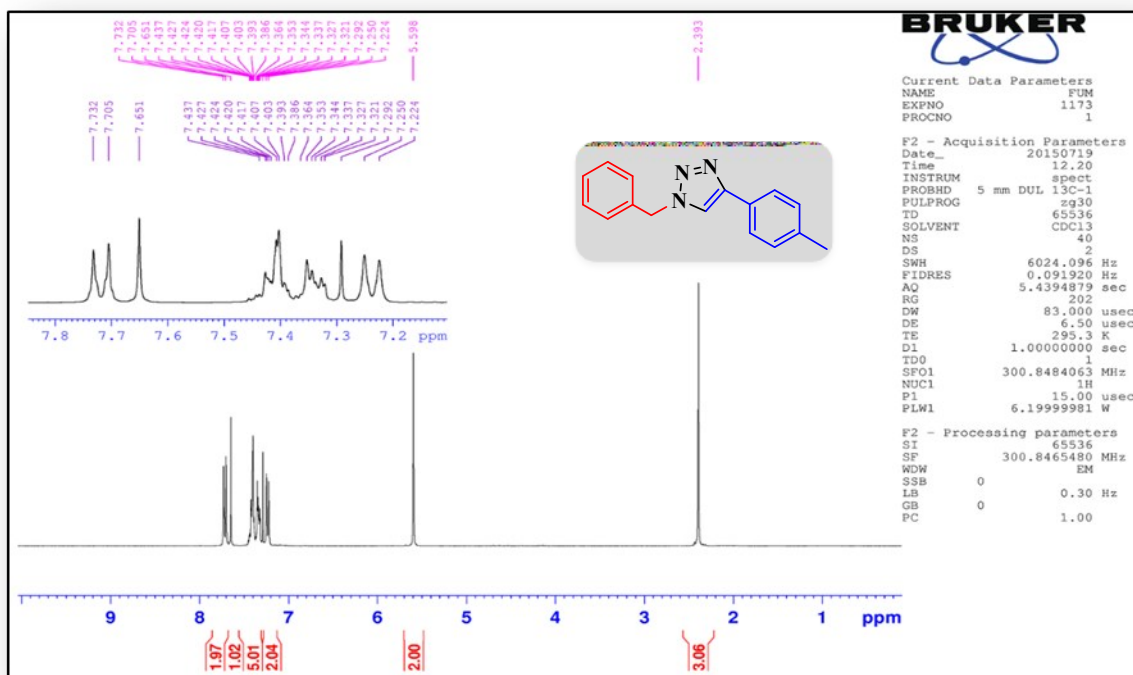

Figure 6:  $^1\text{H}$  NMR (300 MHz,  $\text{CDCl}_3$ ) of 1-Benzyl-4-(*p*-tolyl)-1*H*-1,2,3-triazole (Table 3, Entry 2).

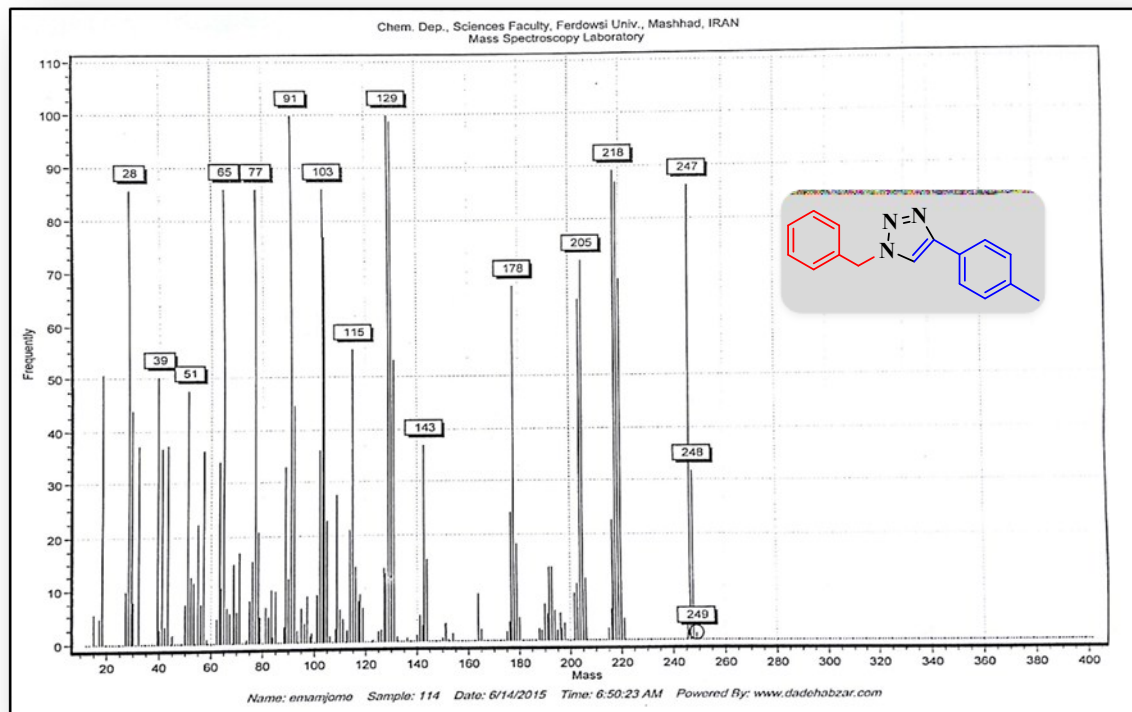

**Figure 7:** Mass spectrum of 1-Benzyl-4-(*p*-tolyl)-1*H*-1,2,3-triazole (Table 3, Entry 2).  
**1-Benzyl-4-(4-methoxyphenyl)-1*H*-1,2,3-triazole** (Table 3, Entry 3) (0.22 g, 85%);  
 white solid (crystals); mp 139–141 °C (from EtOH) (Lit.<sup>3</sup> 140–142 °C); FT-IR (KBr):  
 $\nu_{\max}/\text{cm}^{-1}$  3137, 3035, 2966, 2952, 2855, 2835, 1617, 1580, 1556, 1500, 1455 (CH<sub>2</sub>), 1352,  
 1266 (N–N=N–), 1250, 1221, 1172 (C–N), 1074, 1027, 980, 834 (=C–H oop, triazole  
 ring), 796, 720, 579; <sup>1</sup>H NMR:  $\delta$ H (300 MHz; CDCl<sub>3</sub>; Me<sub>4</sub>Si) 7.78–7.29 (8 H, m, Ar-H,  
 C=CH), 6.96 (2 H, d,  $J$  = 7.2 Hz, Ar-H), 5.58 (2 H, s, CH<sub>2</sub>), 3.85 (3 H, s, OCH<sub>3</sub>); <sup>13</sup>C  
 NMR:  $\delta$ C (75 MHz; CDCl<sub>3</sub>; Me<sub>4</sub>Si) 159, 148, 134, 129, 128.76, 128.08, 126, 123, 114, 55,  
 54; MS,  $m/z$  265 (M<sup>+</sup>, 6%), 263 (78, M – 2 H), 262 (98, M – 3 H), 234 (58, M – CH<sub>3</sub>O),  
 145 (99, M – C<sub>7</sub>H<sub>7</sub>N<sub>2</sub>), 91 (100, M – C<sub>9</sub>H<sub>8</sub>N<sub>3</sub>O), 28 (98, M – C<sub>16</sub>H<sub>15</sub>NO).

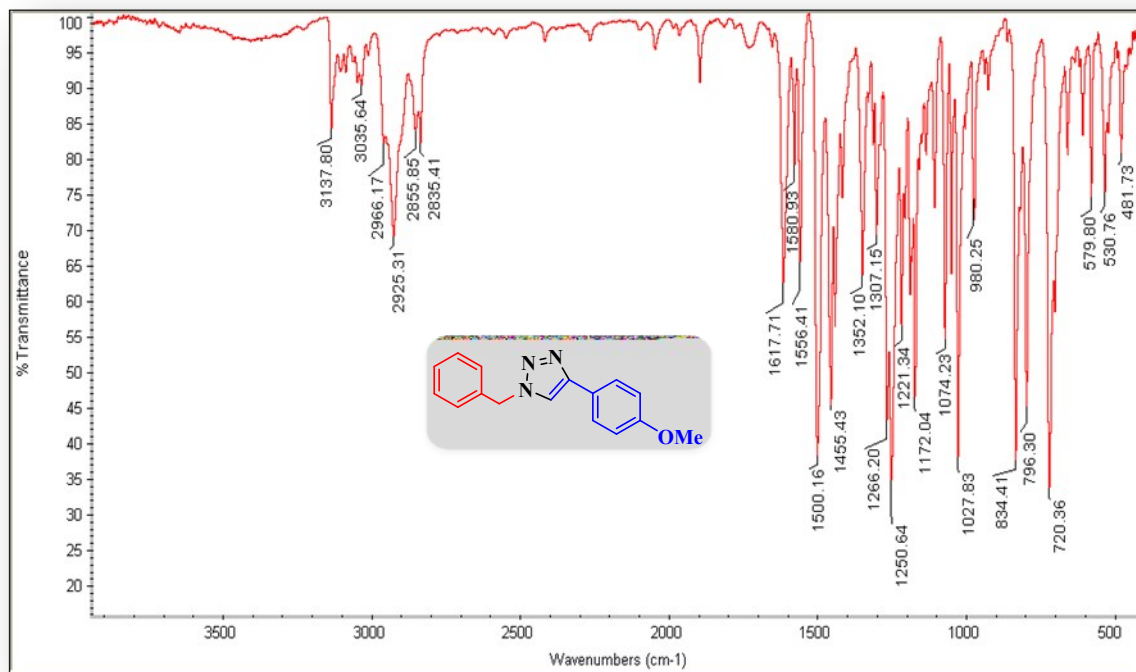

**Figure 8:** FT-IR (KBr) of 1-Benzyl-4-(4-methoxyphenyl)-1H-1,2,3-triazole (Table 3, Entry 3).

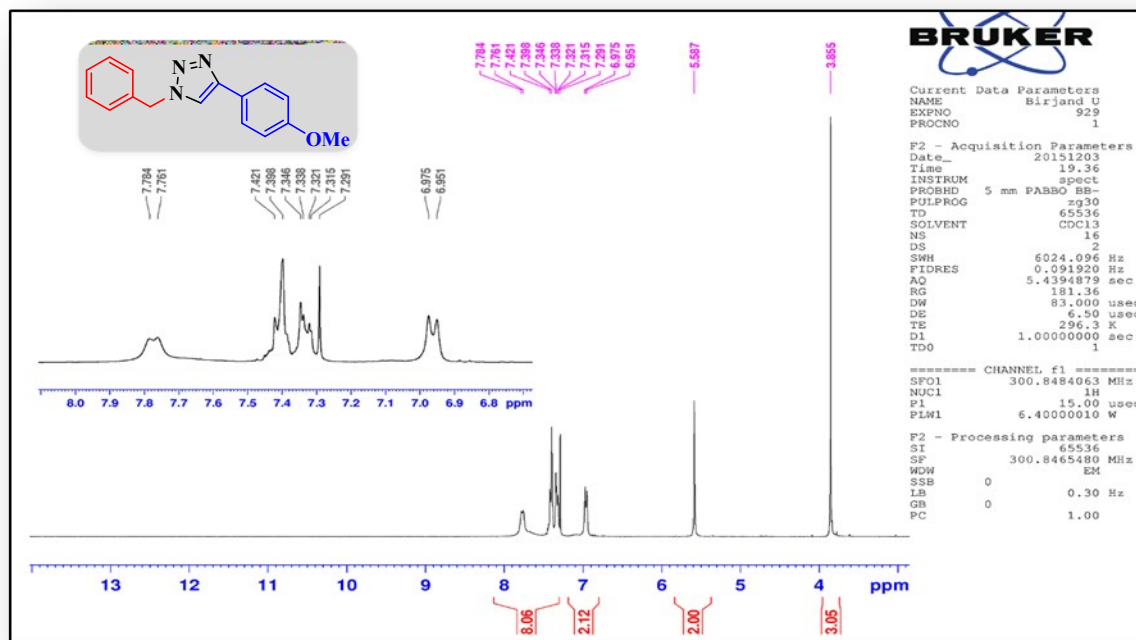

**Figure 9:** <sup>1</sup>H NMR (300 MHz, CDCl<sub>3</sub>) of 1-Benzyl-4-(4-methoxyphenyl)-1H-1,2,3-triazole (Table 3, Entry 3).



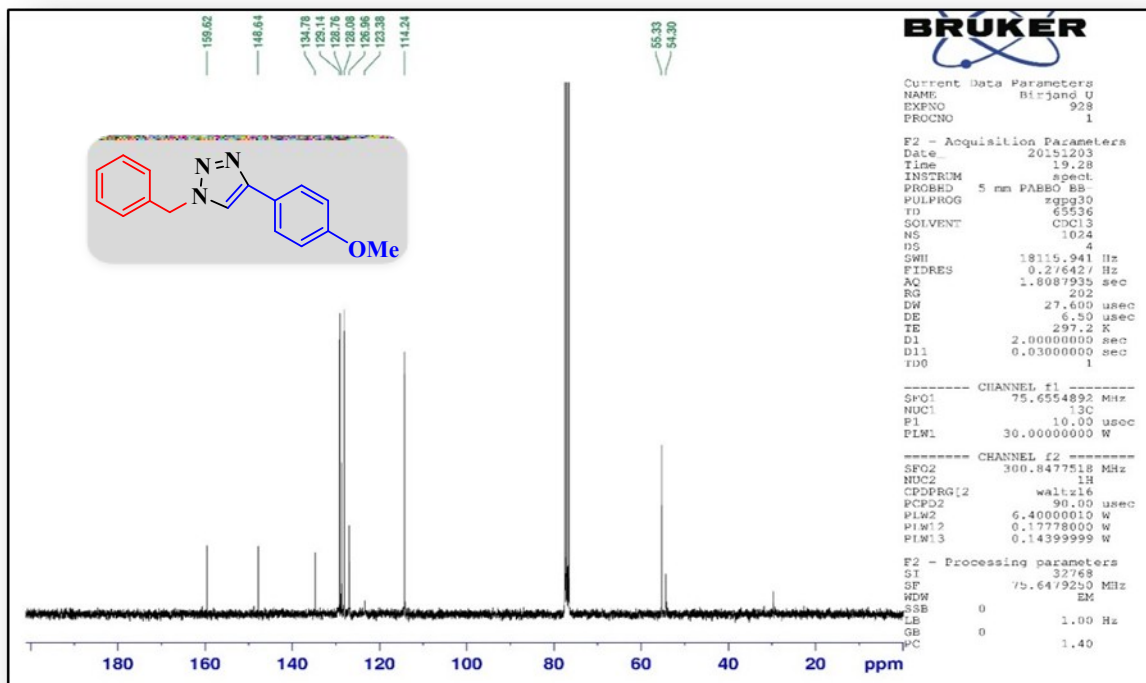

**Figure 10:**  $^{13}\text{C}$  NMR (75MHz,  $\text{CDCl}_3$ ) of 1-Benzyl-4-(4-methoxyphenyl)-1*H*-1,2,3-triazole (Table 3, Entry 3).

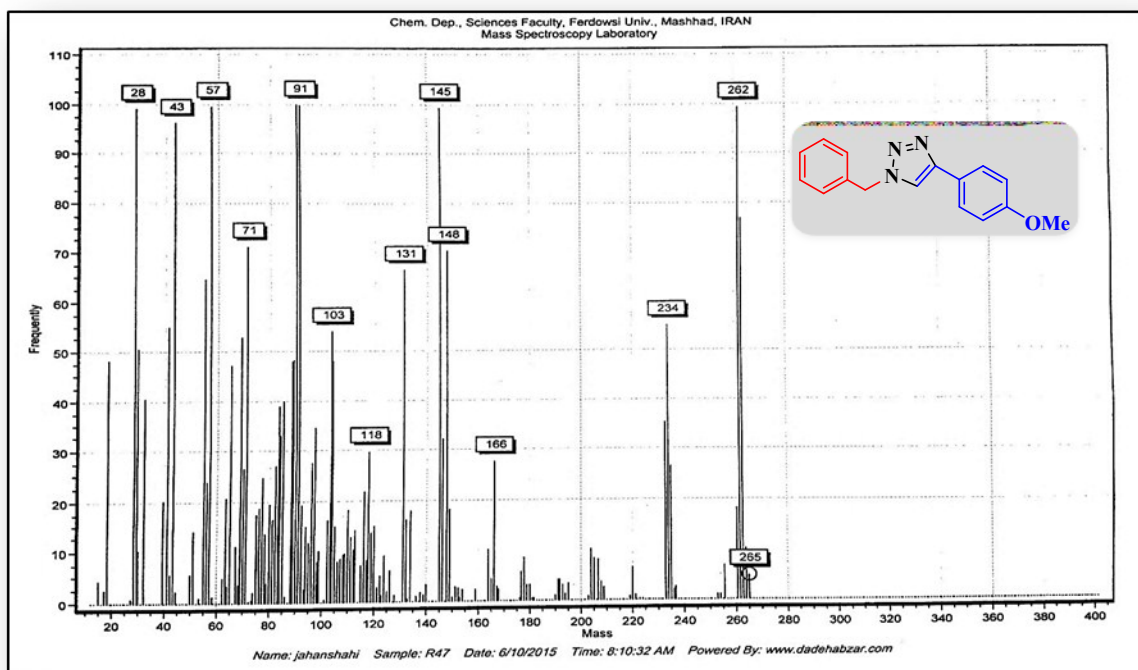

**Figure 11:** Mass spectrum of 1-Benzyl-4-(4-methoxyphenyl)-1*H*-1,2,3-triazole (Table 3, Entry 3).

**1-benzyl-4-(4-(*tert*-butyl)phenyl)-1*H*-1,2,3-triazole (Table 3, Entry 4)** (0.26 g, 90%); white solid (crystals); mp 112–113 °C (from EtOH) (Lit.<sup>4</sup> 112–114 °C); FT-IR (KBr):  $\nu_{\text{max}}/\text{cm}^{-1}$  3084, 3035, 2959, 2865, 1495, 1457 (CH<sub>2</sub>), 1363, 1221 (N–N=N–), 1189 (C–N), 1071, 1048, 976, 832 (=C–H oop, triazole ring), 739, 719, 693, 559; <sup>1</sup>H NMR:  $\delta$ H (400 MHz; CDCl<sub>3</sub>; Me<sub>4</sub>Si) 7.73 (2 H, d, *J* = 8 Hz, Ar-H), 7.63 (1 H, s, C=CH), 7.43–7.21 (7 H, m, Ar-H), 5.58 (2 H, s, CH<sub>2</sub>), 1.37 (9 H, s, 3 CH<sub>3</sub>); MS, *m/z* 291 (M<sup>+</sup>, 4%), 290 (27, M – H), 289 (88, M – 2 H), 171 (99, M – C<sub>7</sub>H<sub>7</sub>N<sub>2</sub>), 157 (43, M – C<sub>7</sub>H<sub>7</sub>N<sub>3</sub>), 91 (100, M – C<sub>12</sub>H<sub>14</sub>N<sub>3</sub>), 57 (45, M – C<sub>15</sub>H<sub>12</sub>N<sub>3</sub>), 29 (96, M – C<sub>19</sub>H<sub>21</sub>N).

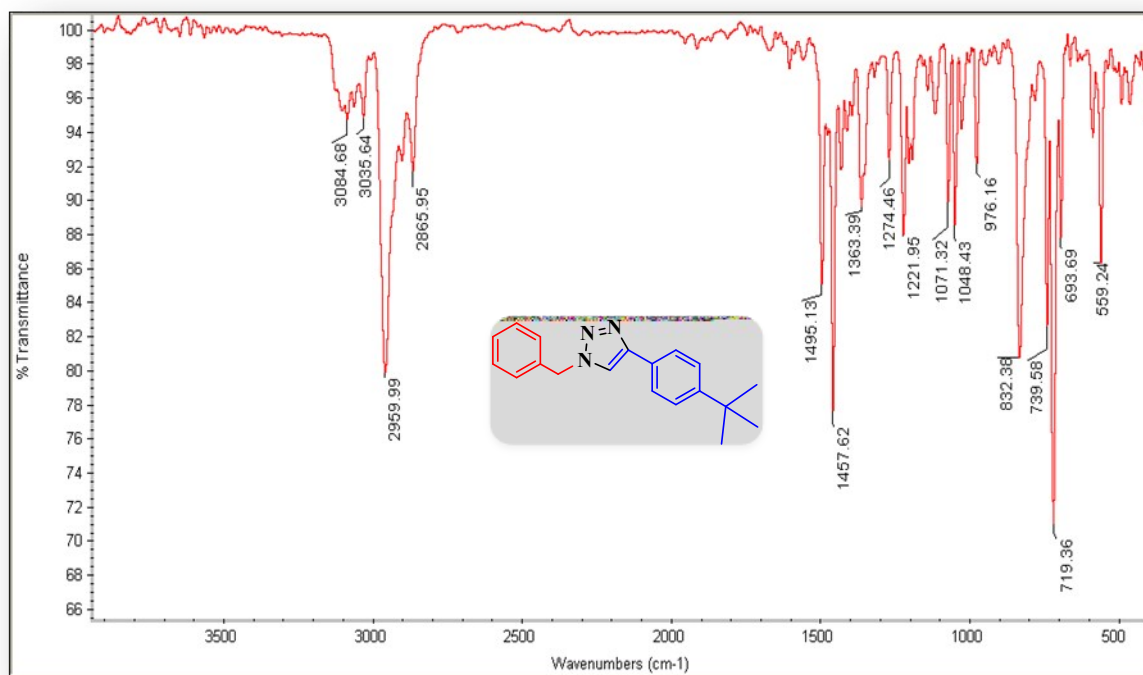

**Figure 12:** FT-IR (KBr) of 1-benzyl-4-(4-(*tert*-butyl)phenyl)-1*H*-1,2,3-triazole (Table 3, Entry 4).

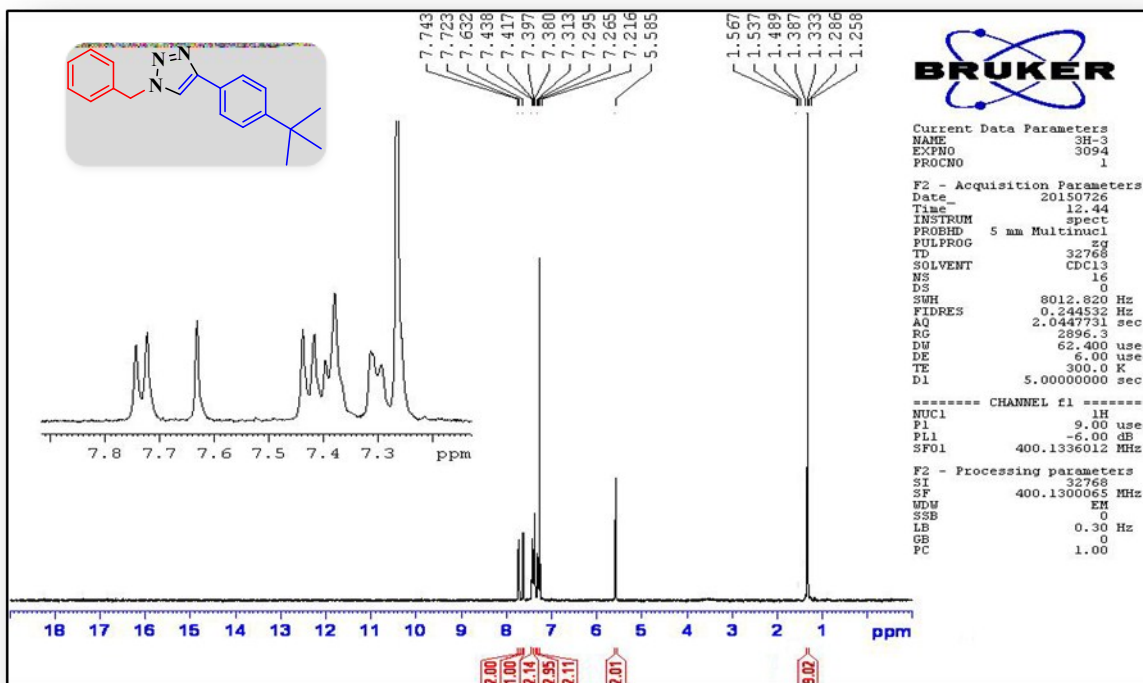

**Figure 13:**  $^1\text{H}$  NMR (400 MHz,  $\text{CDCl}_3$ ) of 1-benzyl-4-(4-(*tert*-butyl)phenyl)-1*H*-1,2,3-triazole (Table 3, Entry 4).

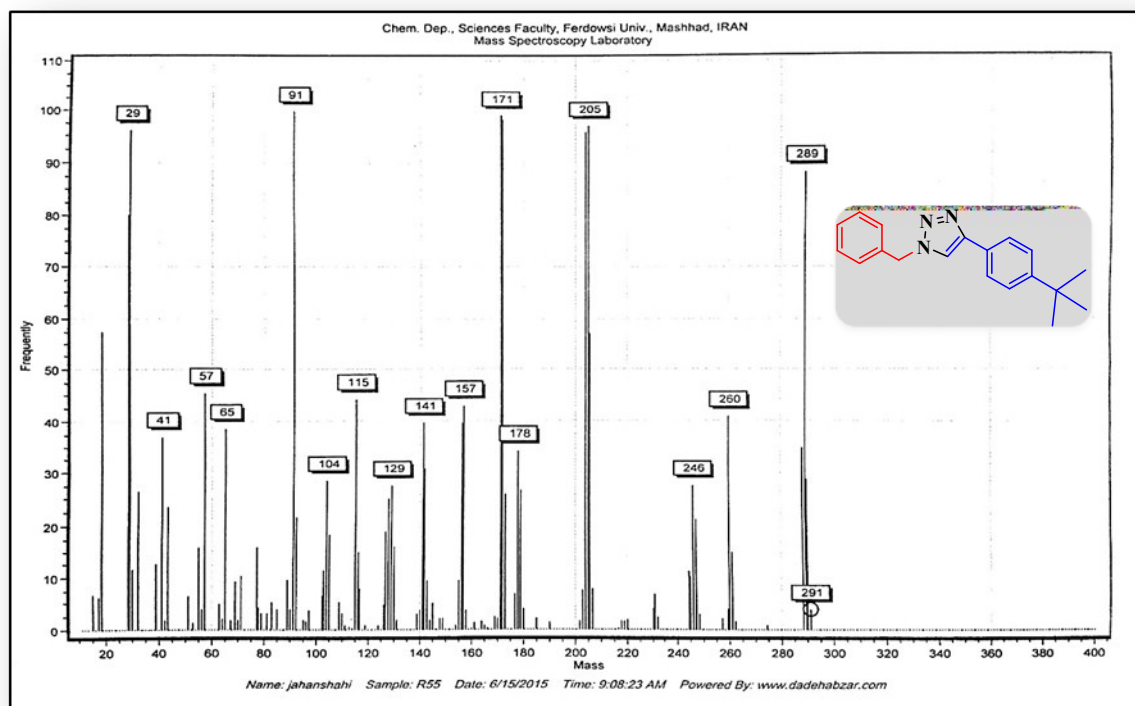

**Figure 14:** Mass spectrum of 1-benzyl-4-(4-(*tert*-butyl)phenyl)-1*H*-1,2,3-triazole (Table 3, Entry 4).

**2-(1-benzyl-1*H*-1,2,3-triazol-4-yl)pyridine (Table 3, Entry 5)** (0.19 g, 82%); white solid (crystals); mp 112–113 °C (from EtOH) (Lit.<sup>5</sup> 113–114 °C); FT-IR (KBr):  $\nu_{\text{max}}/\text{cm}^{-1}$  3137, 3105, 3084, 3002, 2949, 1599, 1568, 1455 (CH<sub>2</sub>), 1419, 1352, 1223 (N–N=N–), 1196 (C–N), 1082, 1044, 996, 857 (=C–H oop, triazole ring), 786, 727, 711, 579; <sup>1</sup>H NMR:  $\delta$ H (300 MHz; CDCl<sub>3</sub>; Me<sub>4</sub>Si) 8.55 (1 H, d,  $J = 4.2$  Hz, Py-H), 8.19 (1 H, d,  $J = 8.1$  Hz, Py-H), 8.06 (1 H, s, C=CH), 7.78 (1 H, td,  $J_1 = 7.8$  Hz,  $J_2 = 1.8$  Hz, Py-H), 7.41-7.33 (5 H, m, Ar-H, Py-H), 7.24-7.20 (1 H, m, Ar-H), 5.60 (2 H, s, CH<sub>2</sub>); <sup>13</sup>C NMR:  $\delta$ C (75 MHz; CDCl<sub>3</sub>; Me<sub>4</sub>Si) 150, 149, 148, 136, 134, 129, 128.86, 128.33, 122, 121, 120, 54. MS,  $m/z$  236 (M<sup>+</sup>, 5%), 235 (41, M – H), 234 (82, M – 2 H), 207 (95, M – N<sub>2</sub>), 78 (35, M – C<sub>9</sub>H<sub>8</sub>N<sub>3</sub>), 91 (92, M – C<sub>7</sub>H<sub>5</sub>N<sub>4</sub>).

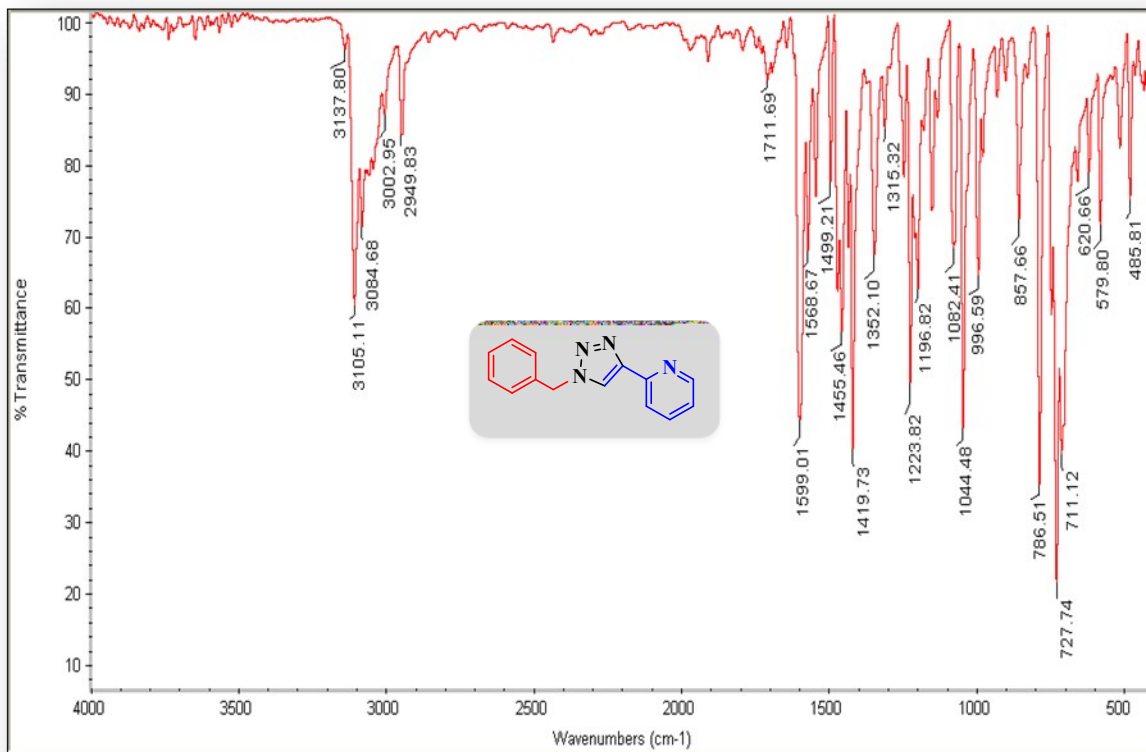

Figure 15: FT-IR (KBr) of 2-(1-benzyl-1*H*-1,2,3-triazol-4-yl)pyridine (Table 3, Entry 5)

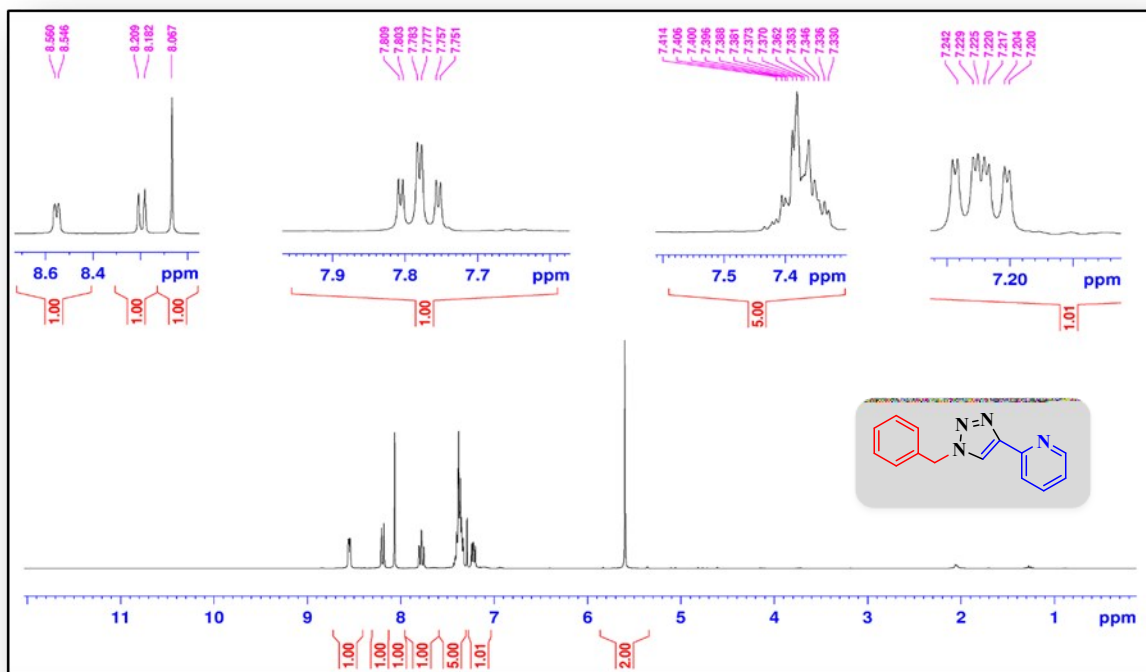

Figure 16:  $^1\text{H}$  NMR (300 MHz,  $\text{CDCl}_3$ ) of 2-(1-benzyl-1*H*-1,2,3-triazol-4-yl)pyridine (Table 3, Entry 5).

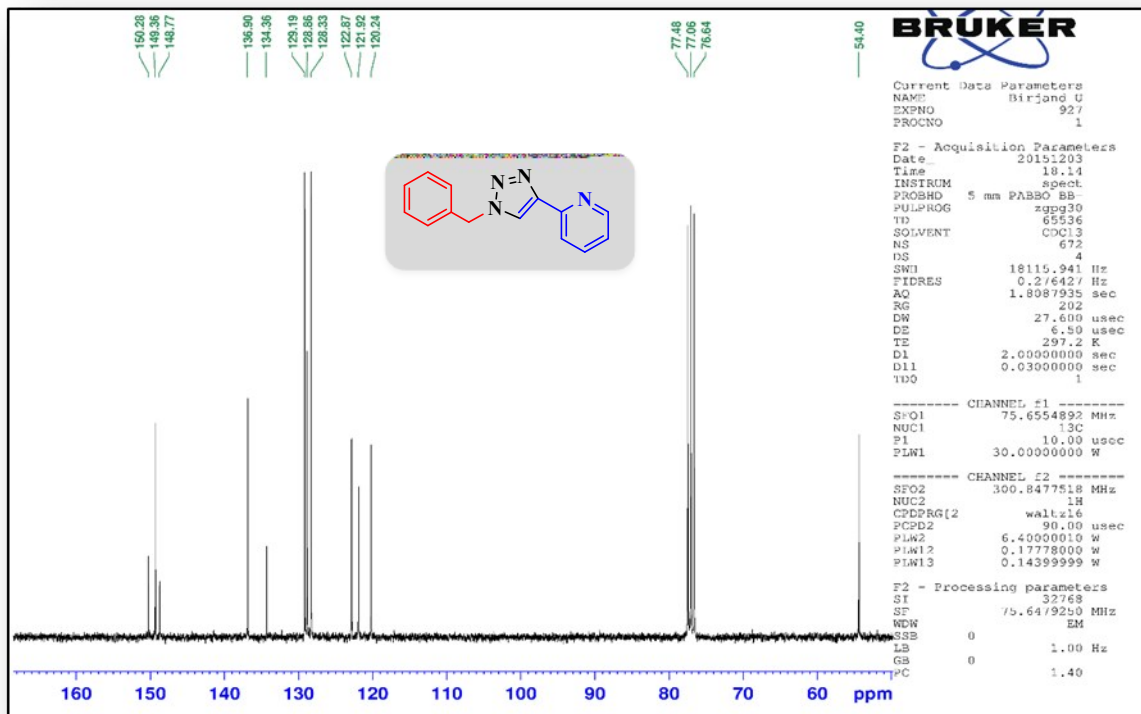

Figure 17:  $^{13}\text{C}$  NMR (75MHz,  $\text{CDCl}_3$ ) of 2-(1-benzyl-1H-1,2,3-triazol-4-yl)pyridine (Table 3, Entry 5).

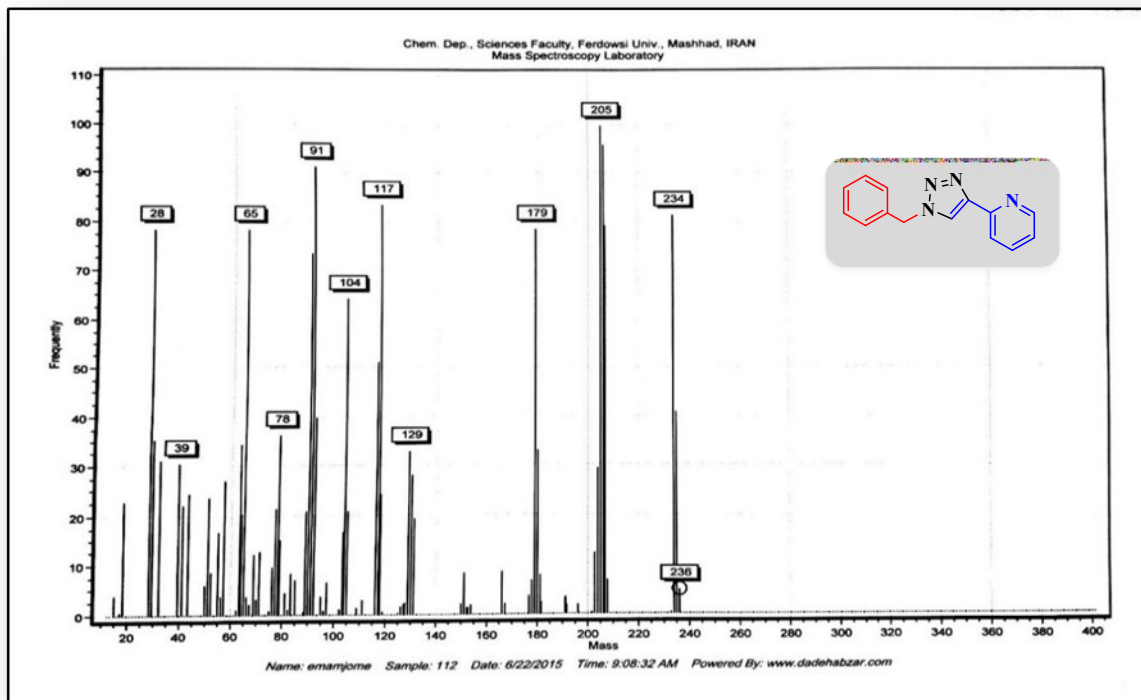

Figure 18: Mass spectrum of 2-(1-benzyl-1H-1,2,3-triazol-4-yl)pyridine (Table 3, Entry 5).

**1-benzyl-4-(4-chlorophenyl)-1H-1,2,3-triazole (Table 3, Entry 6)** (0.24 g, 90%); white solid (crystals); mp 125–126 °C (from EtOH) (Lit.<sup>6</sup> 125–127 °C); <sup>1</sup>H NMR: δH (300 MHz; CDCl<sub>3</sub>; Me<sub>4</sub>Si) 7.74 (2 H, d, *J* = 8.4 Hz, Ar-H), 7.69 (1 H, s, C=CH), 7.40-7.29 (7 H, m, Ar-H), 5.57 (2 H, s, CH<sub>2</sub>); <sup>13</sup>C NMR: δC (75 MHz; CDCl<sub>3</sub>; Me<sub>4</sub>Si) 147, 134, 133, 129.21, 129.11, 129.01, 128.87, 128.11, 126, 119, 54; MS, *m/z* 269 (M<sup>+</sup>, 8%), 271 (2, M + 2), 268 (60, M – H), 267 (65, M – 2 H), 241 (32, M – N<sub>2</sub>), 178 (65, M – C<sub>7</sub>H<sub>7</sub>), 149 (94, M – C<sub>7</sub>H<sub>7</sub>N<sub>2</sub>), 123 (69, M – C<sub>8</sub>H<sub>8</sub>N<sub>3</sub>), 104 (65, M – C<sub>8</sub>H<sub>5</sub>ClN<sub>2</sub>), 91 (100, M – C<sub>8</sub>H<sub>5</sub>ClN<sub>3</sub>), 28 (62, M – C<sub>15</sub>H<sub>12</sub>ClN).

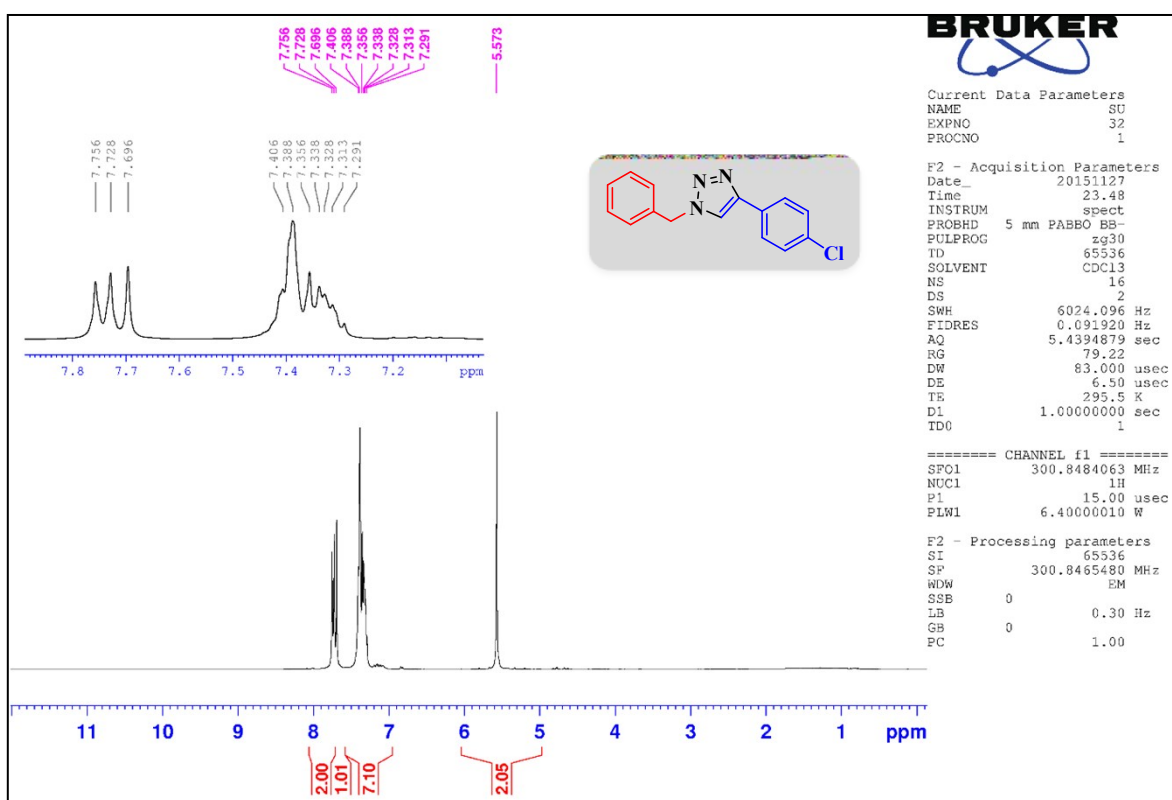

**Figure 19:** <sup>1</sup>H NMR (300 MHz, CDCl<sub>3</sub>) of 1-(4-chlorobenzyl)-4-phenyl-1H-1,2,3-triazole (Table 3, Entry 6).

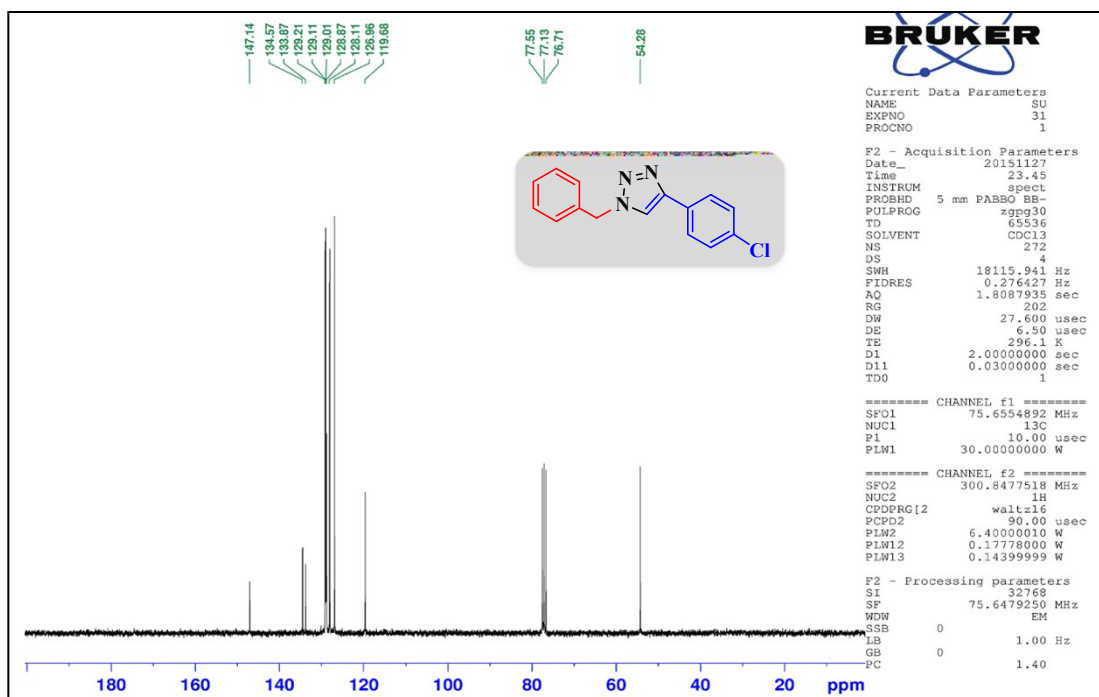

**Figure 20:**  $^{13}\text{C}$  NMR (75MHz,  $\text{CDCl}_3$ ) of 1-benzyl-4-(4-chlorophenyl)-1*H*-1,2,3-triazole (Table 3, Entry 6).

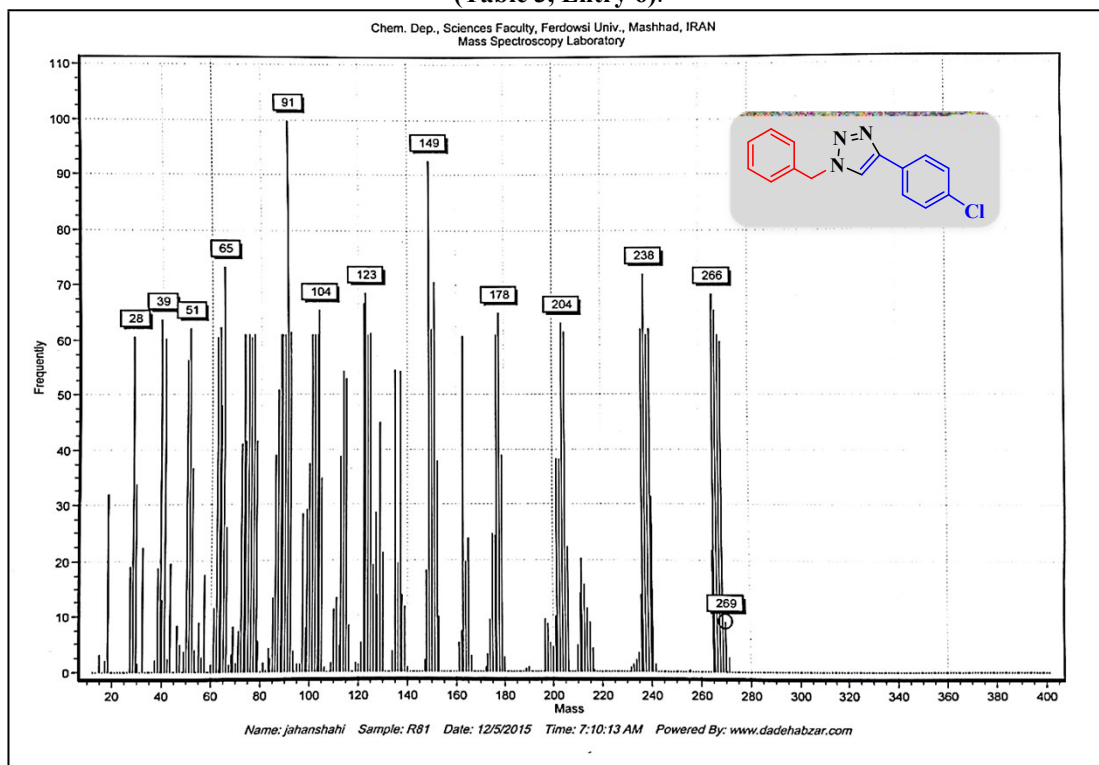

**Figure 21:** Mass spectrum of 1-benzyl-4-(4-chlorophenyl)-1*H*-1,2,3-triazole (Table 3, Entry 6).



**1-benzyl-4-(4-bromophenyl)-1*H*-1,2,3-triazole (Table 3, Entry 7)** (0.27 g, 87%); white solid (crystals); mp 144 °C (from EtOH) (Lit.<sup>6</sup> 143–145 °C); <sup>1</sup>H NMR: δH (300 MHz; CDCl<sub>3</sub>; Me<sub>4</sub>Si) 7.69 (2 H, d, *J* = 1.8 Hz, Ar-H), 7.67 (1 H, s, C=CH), 7.53 (2 H, d, *J* = 6.9 Hz, Ar-H), 7.29-7.43 (5 H, m, Ar-H), 5.58 (2 H, s, CH<sub>2</sub>); <sup>13</sup>C NMR: δC (75 MHz; CDCl<sub>3</sub>; Me<sub>4</sub>Si) 147, 134, 131, 129.54, 129.22, 128.89, 128.12, 127, 122, 119, 54; MS, *m/z* 314 (M<sup>+</sup>, 7%), 316 (6, M + 2), 313 (56, M – H), 312 (72, M – 2 H), 285 (13, M – N<sub>2</sub>), 194 (88, M – C<sub>8</sub>H<sub>8</sub>N), 104 (82, M – C<sub>8</sub>H<sub>5</sub>BrN<sub>2</sub>), 91 (100, M – C<sub>8</sub>H<sub>5</sub>BrN<sub>3</sub>), 28 (24, M – C<sub>15</sub>H<sub>12</sub>BrN).

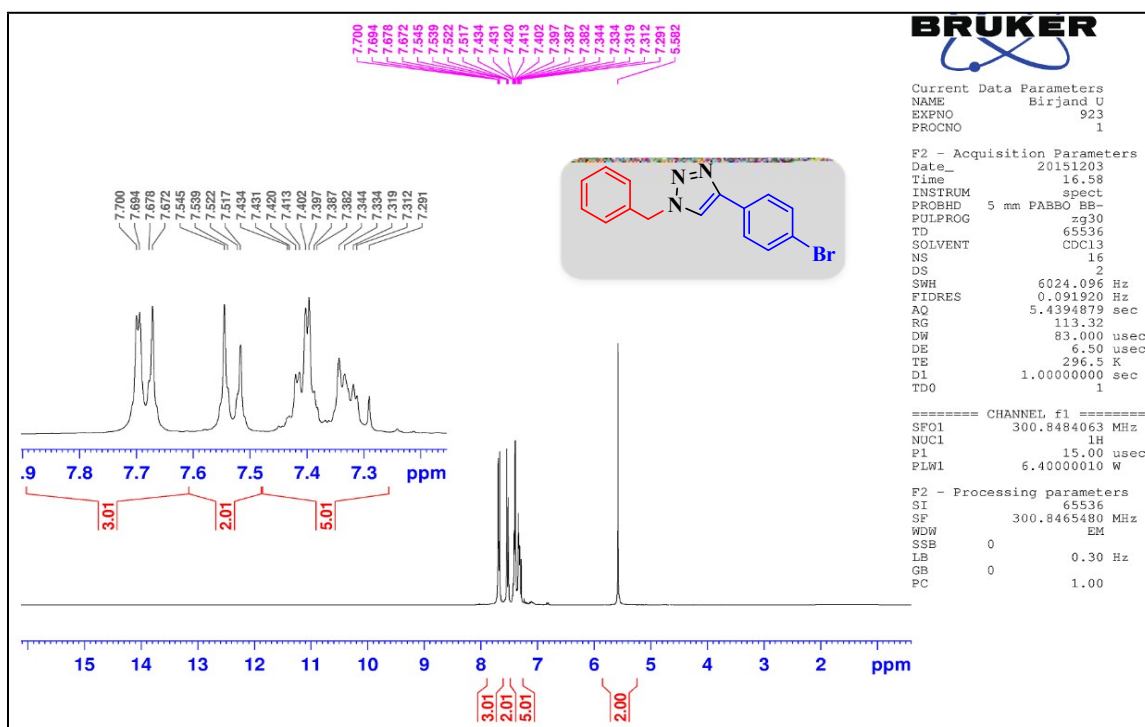

**Figure 22:** <sup>1</sup>H NMR (300 MHz, CDCl<sub>3</sub>) of 1-benzyl-4-(4-bromophenyl)-1*H*-1,2,3-triazole (Table 3, Entry 7).

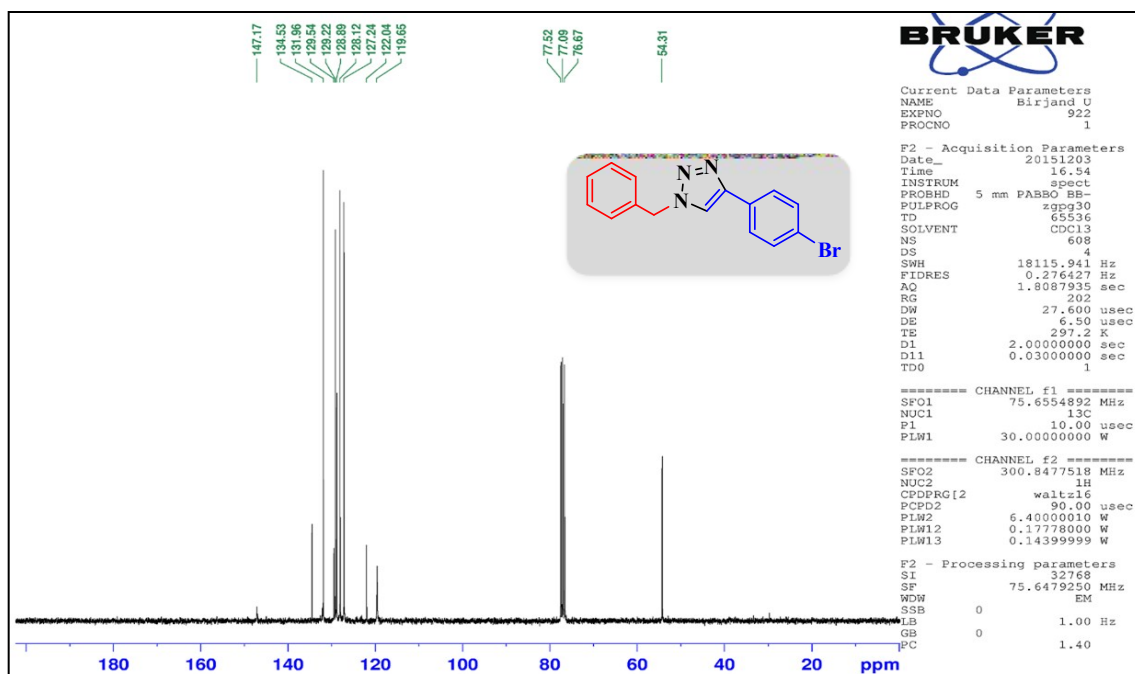

**Figure 23:**  $^{13}\text{C}$  NMR (75MHz,  $\text{CDCl}_3$ ) of 1-benzyl-4-(4-bromophenyl)-1H-1,2,3-triazole (Table 3, Entry 7).

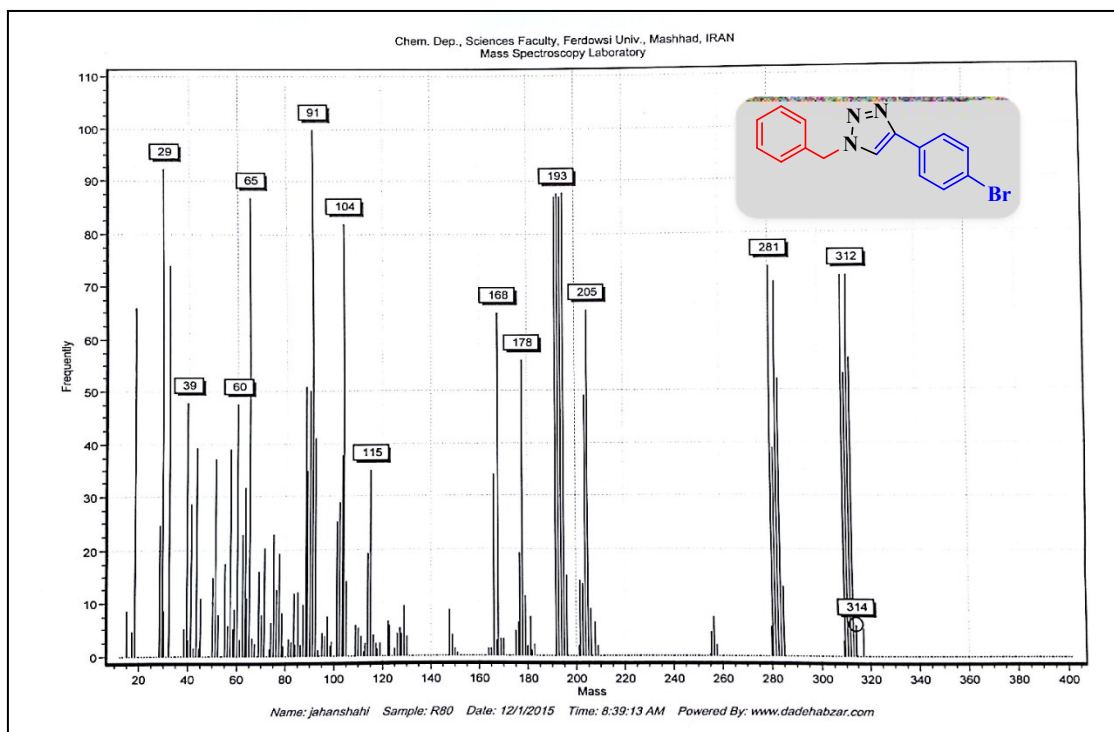

**Figure 24:** Mass spectrum of 1-benzyl-4-(4-bromophenyl)-1H-1,2,3-triazole (Table 3, Entry 7).

**1-benzyl-4-(4-nitrophenyl)-1*H*-1,2,3-triazole (Table 3, Entry 8)** (0.27 g, 95%); yellow solid (crystals); mp 167–168 °C (from EtOH) (Lit.<sup>7</sup> 168–170 °C); <sup>1</sup>H NMR: δH (300 MHz; CDCl<sub>3</sub>; Me<sub>4</sub>Si) 8.27 (2 H, d, *J* = 8.7 Hz, Ar-H), 7.99 (2 H, d, *J* = 8.7 Hz, Ar-H), 7.85 (1 H, s, C=CH), 7.29-7.44 (5 H, m, Ar-H), 5.63 (2 H, s, CH<sub>2</sub>); <sup>13</sup>C NMR: δC (75 MHz; CDCl<sub>3</sub>; Me<sub>4</sub>Si) 147, 146, 136, 134, 129.33, 129.09, 128, 126, 124, 121, 54; MS, *m/z* 280 (M<sup>+</sup>, 5%), 279 (57, M – H), 278 (68, M – 2 H), 252 (8, M – N<sub>2</sub>), 233 (24, M – NO<sub>2</sub>), 148 (37, M – C<sub>8</sub>H<sub>8</sub>N<sub>2</sub>), 105 (39, M – C<sub>8</sub>H<sub>5</sub>N<sub>3</sub>O<sub>2</sub>), 91 (100, M – C<sub>8</sub>H<sub>5</sub>N<sub>4</sub>O<sub>2</sub>), 28 (58, M – C<sub>15</sub>H<sub>12</sub>N<sub>2</sub>O<sub>2</sub>).

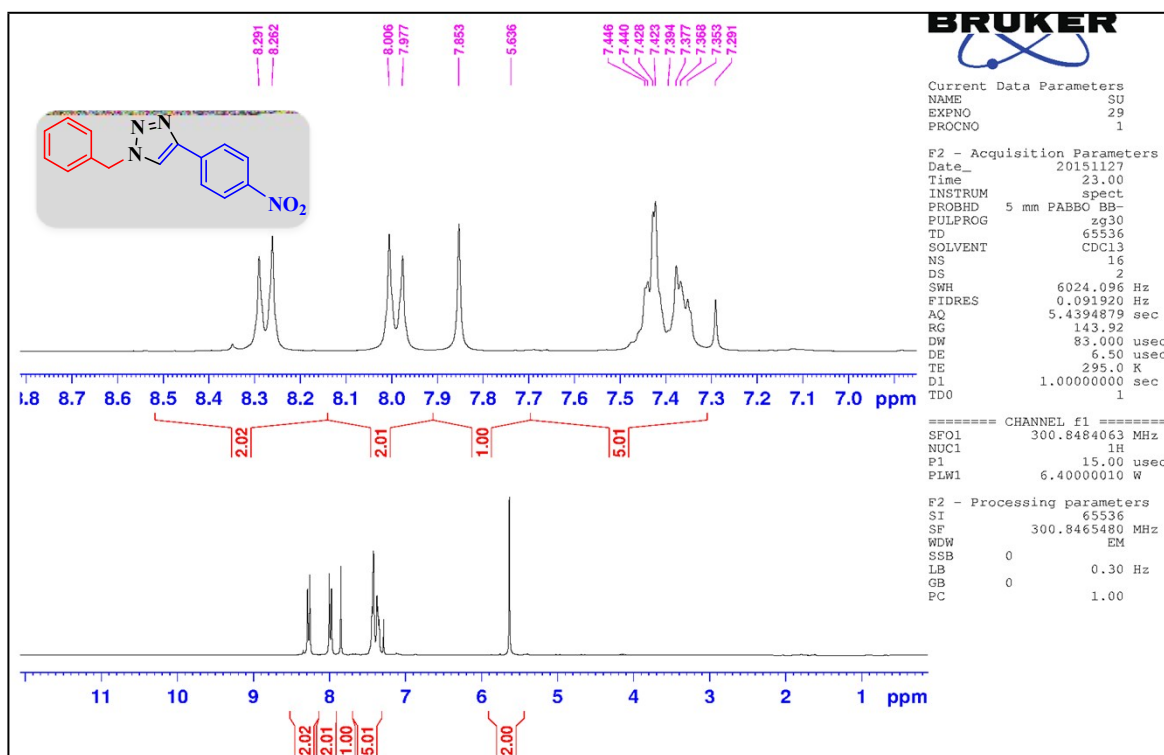

**Figure 25:** <sup>1</sup>H NMR (300 MHz, CDCl<sub>3</sub>) of 1-benzyl-4-(4-nitrophenyl)-1*H*-1,2,3-triazole (Table 3, Entry 8).

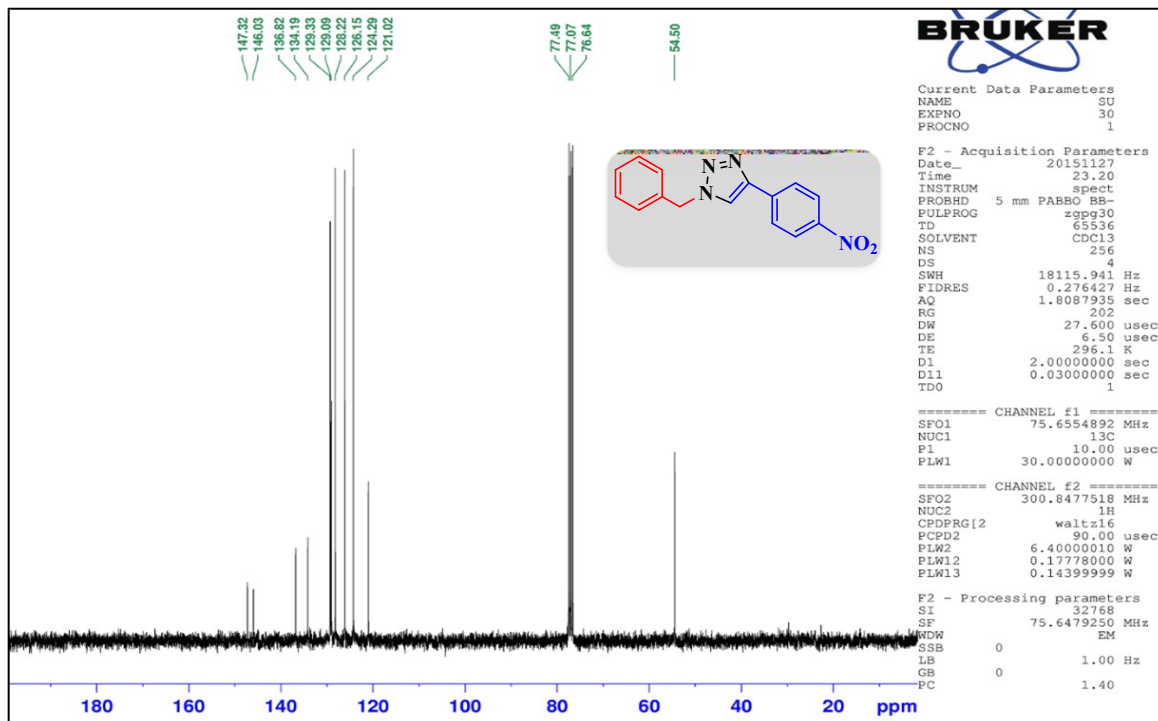

**Figure 26:**  $^{13}\text{C}$  NMR (75MHz,  $\text{CDCl}_3$ ) of 1-benzyl-4-(4-nitrophenyl)-1H-1,2,3-triazole (Table 3, Entry 8).

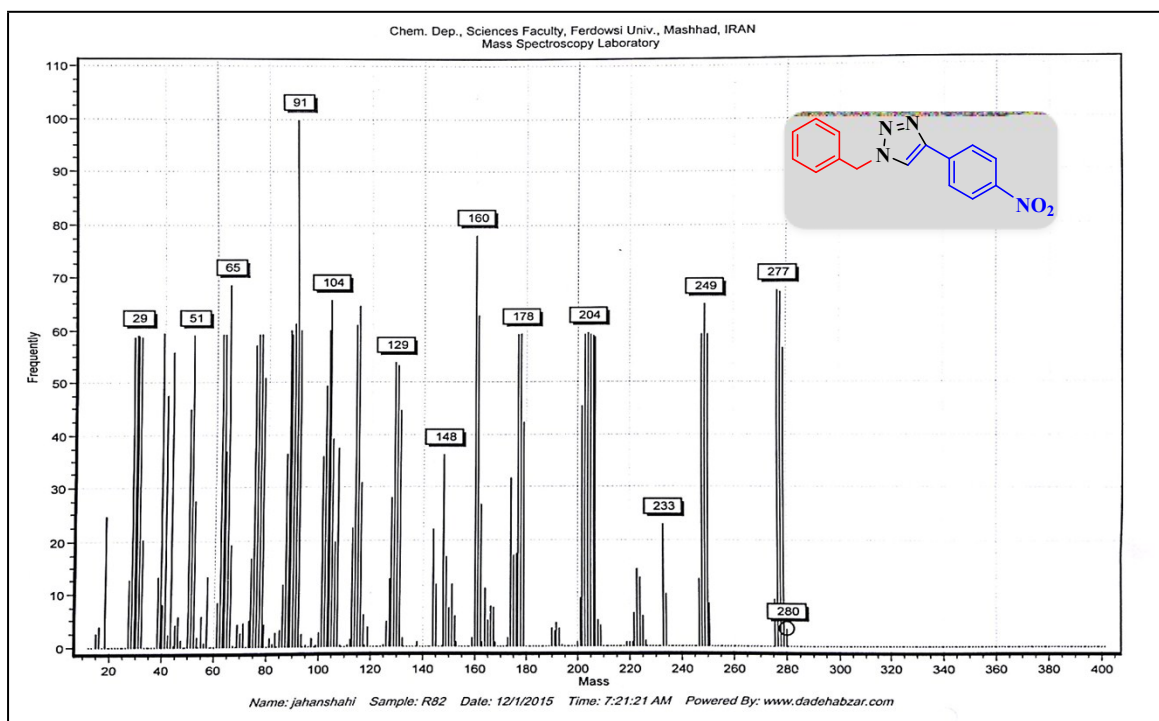

**Figure 27:** Mass spectrum of 1-benzyl-4-(4-nitrophenyl)-1H-1,2,3-triazole (Table 3, Entry 8).

(1-benzyl-1*H*-1,2,3-triazol-4-yl)methanol (Table 3, Entry 9) (0.14 g, 73%); white solid (crystals); mp 77-78 °C (from EtOH) (Lit.<sup>8</sup> 77 - 79 °C); <sup>1</sup>H NMR: δH (300 MHz; CDCl<sub>3</sub>; Me<sub>4</sub>Si) 7.48 (1 H, s, C=CH), 7.36–7.34 (3 H, m, Ar-H), 7.29–7.24 (2 H, m, Ar-H), 5.48 (2 H, s, CH<sub>2</sub>), 4.72 (1 H, br s, OH); <sup>13</sup>C NMR: δC (75 MHz; CDCl<sub>3</sub>; Me<sub>4</sub>Si) 148, 134, 129, 128.7, 128.1, 121, 56, 54; MS, *m/z* 189 (M<sup>+</sup>, 9%), 188 (64, M-1H), 187 (64, M - 2H), 159 (63, M - CH<sub>3</sub>O), 129 (65), 91 (100, M - C<sub>3</sub>H<sub>4</sub>N<sub>3</sub>O), 77 (55, M - C<sub>4</sub>H<sub>6</sub>N<sub>3</sub>O), 65 (71), 28 (64, M - C<sub>10</sub>H<sub>11</sub>NO).

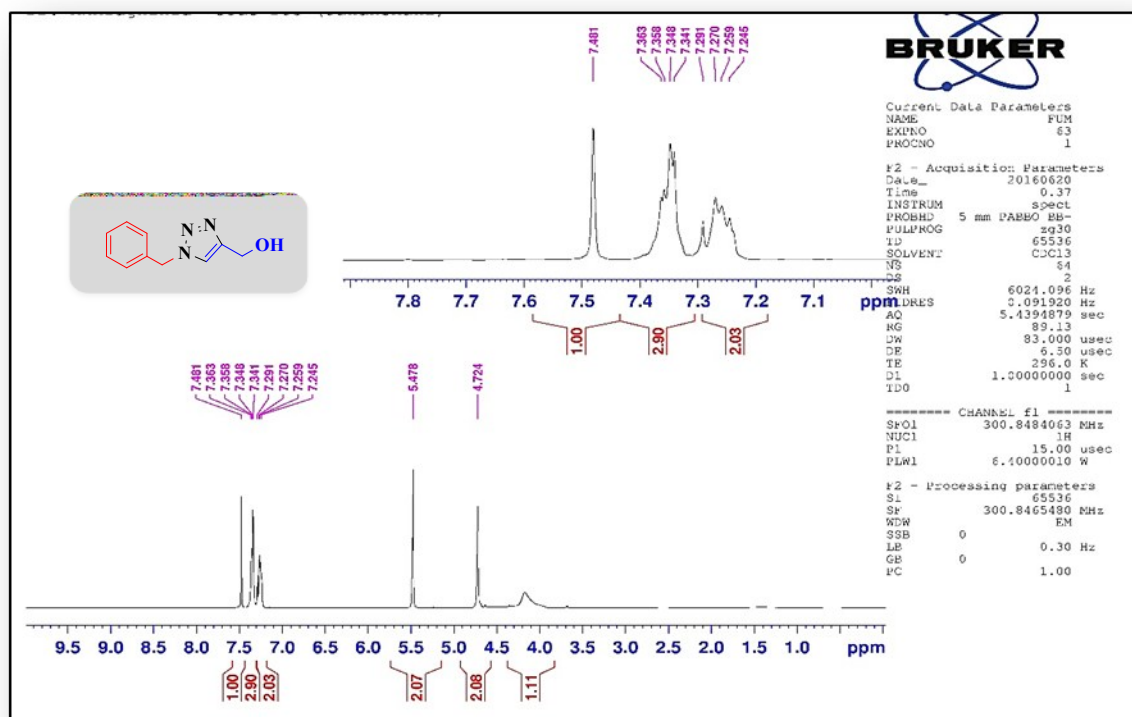

**Figure 28:** <sup>1</sup>H NMR (300 MHz, CDCl<sub>3</sub>) of (1-benzyl-1*H*-1,2,3-triazol-4-yl)methanol (Table 3, Entry 9).

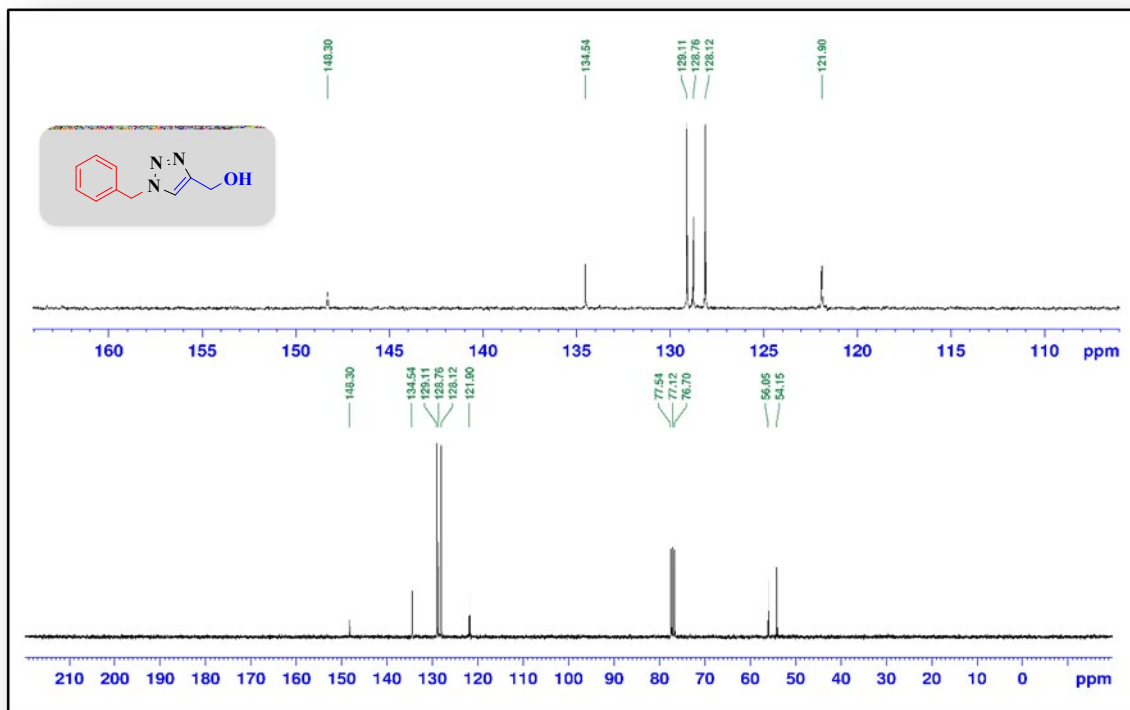

**Figure 29:** <sup>13</sup>C NMR (300 MHz, CDCl<sub>3</sub>) of (1-benzyl-1*H*-1,2,3-triazol-4-yl)methanol (Table 3, Entry 9).

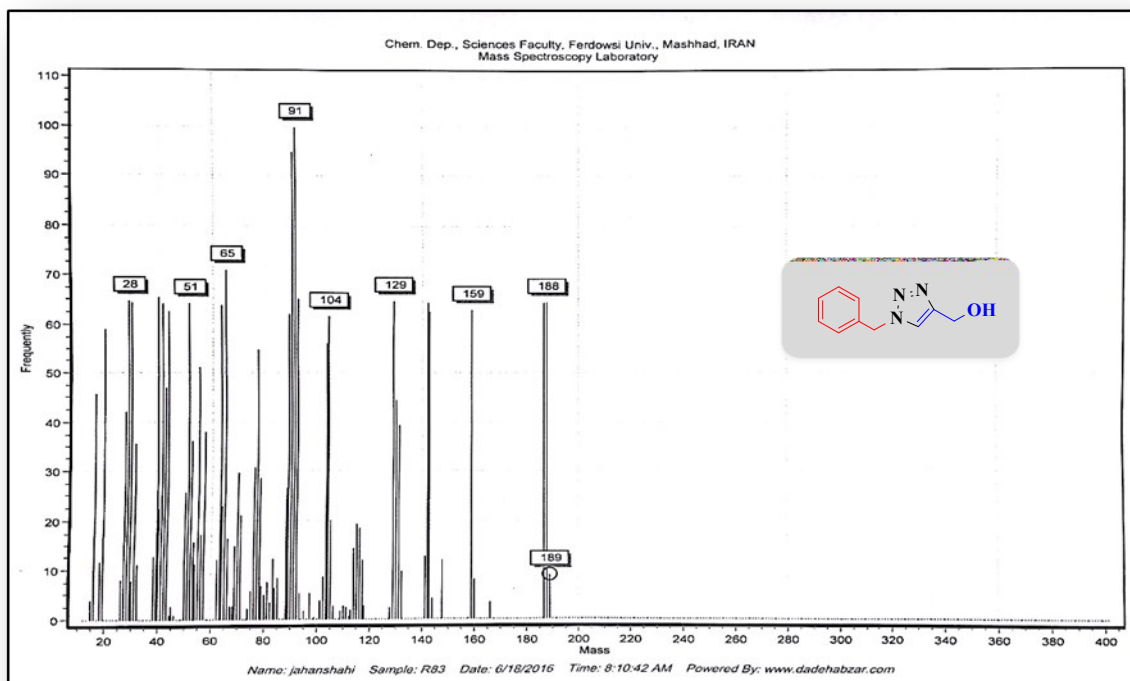

**Figure 30:** Mass spectrum of 1-benzyl-1*H*-1,2,3-triazol-4-yl)methanol (Table 3, Entry 9).

**1-benzyl-4-pentyl-1*H*-1,2,3-triazole (Table 3, Entry 10)** (0.18 g, 77%); yellow-green solid (crystals); mp 41-42 °C (from EtOH) (Lit.<sup>9</sup> 42–43 °C); <sup>1</sup>H NMR: δH (300 MHz; CDCl<sub>3</sub>; Me<sub>4</sub>Si) 7.29-7.26 (3 H, m, C=CH, Ar-H), 7.21–7.17 (3 H, m, Ar-H), 5.41 (2 H, s, CH<sub>2</sub>), 2.62 (2 H, t, *J* = 7.8 Hz, CH<sub>2</sub>Bt), 1.6 (2 H, qn, *J* = 7.2 Hz, CH<sub>2</sub>CH<sub>2</sub>Pr), 1.29-1.22 (4 H, m, Et CH<sub>2</sub>CH<sub>2</sub>CH<sub>3</sub>), 0.83 (3 H, t, *J* = 6.9 Hz, CH<sub>3</sub>); <sup>13</sup>C NMR: δC (75 MHz; CDCl<sub>3</sub>; Me<sub>4</sub>Si) 148, 135, 129, 128, 127, 120, 54, 31, 29, 25, 22, 14; MS, *m/z* 229 (M<sup>+</sup>, 4%), 227 (70, M – 2H), 172 (68, M – C<sub>4</sub>H<sub>9</sub>), 91 (99, M – C<sub>7</sub>H<sub>12</sub>N<sub>3</sub>), 83 (70), 57 (70, M – C<sub>10</sub>H<sub>10</sub>N<sub>3</sub>), 43 (67, M – C<sub>11</sub>H<sub>12</sub>N<sub>3</sub>), 29 (47, M – C<sub>12</sub>H<sub>14</sub>N<sub>3</sub>), 28 (75, M – C<sub>14</sub>H<sub>19</sub>N).

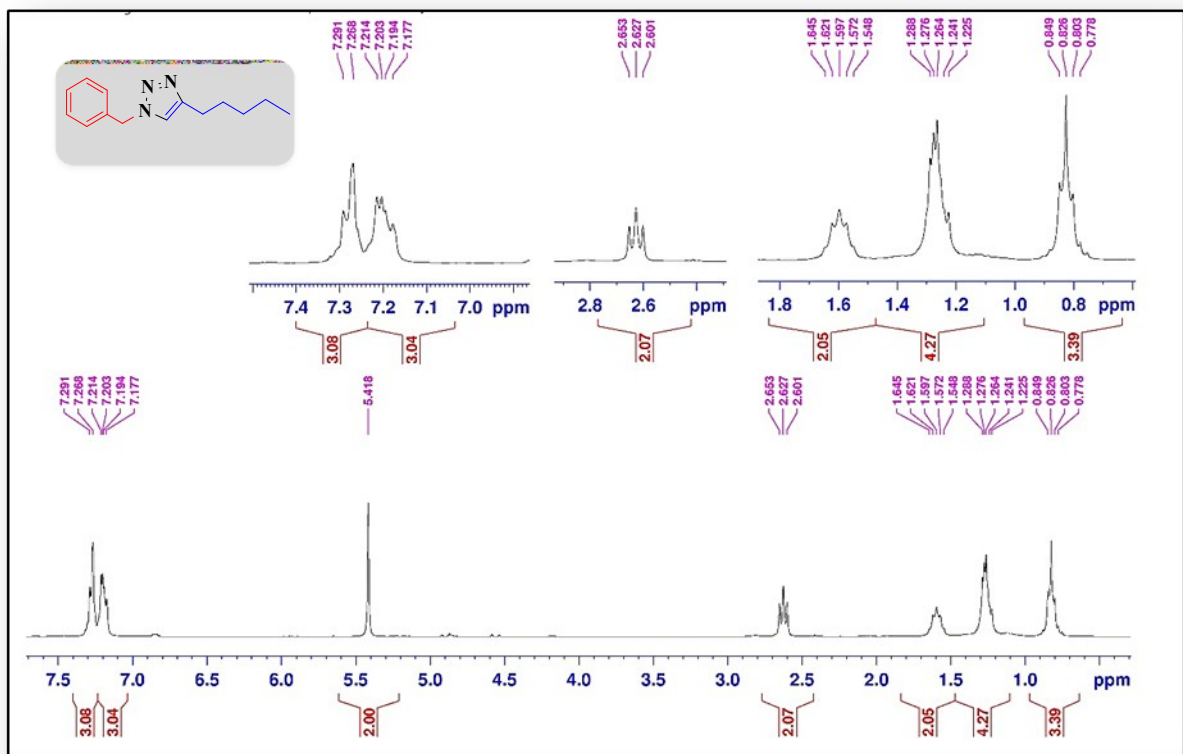

**Figure 31:** <sup>1</sup>H NMR (300 MHz, CDCl<sub>3</sub>) of 1-benzyl-4-pentyl-1*H*-1,2,3-triazole (Table 3, Entry 10).

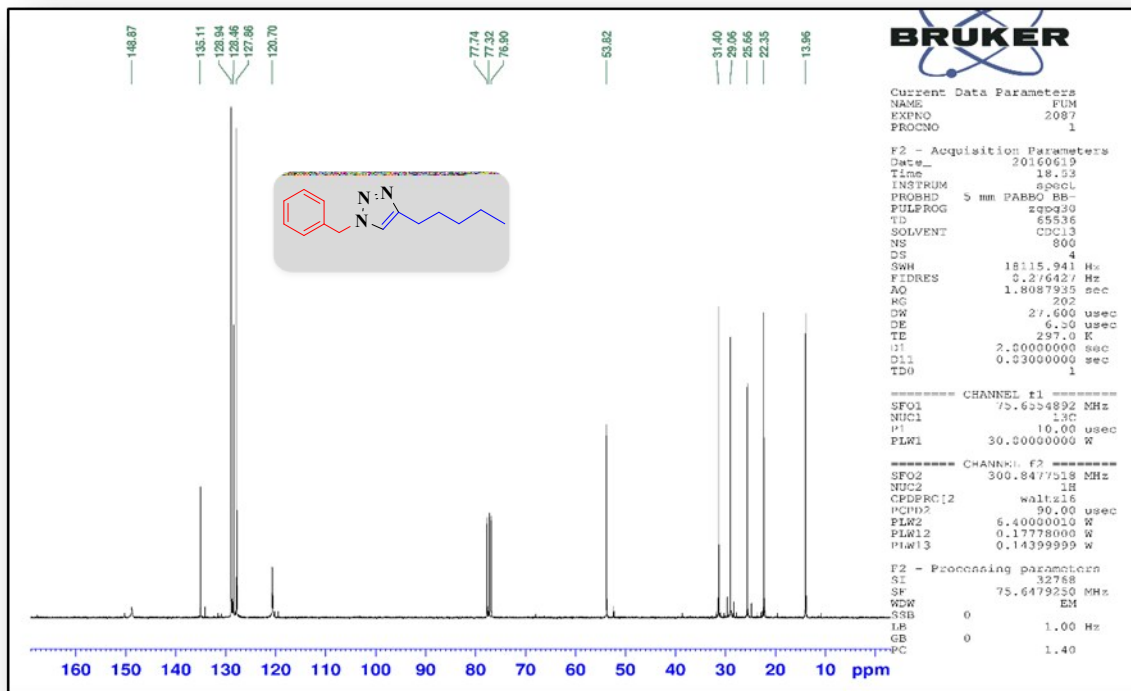

Figure 32:  $^{13}\text{C}$  NMR (300 MHz,  $\text{CDCl}_3$ ) of 1-benzyl-4-pentyl-1*H*-1,2,3-triazole (Table 3, Entry 10).

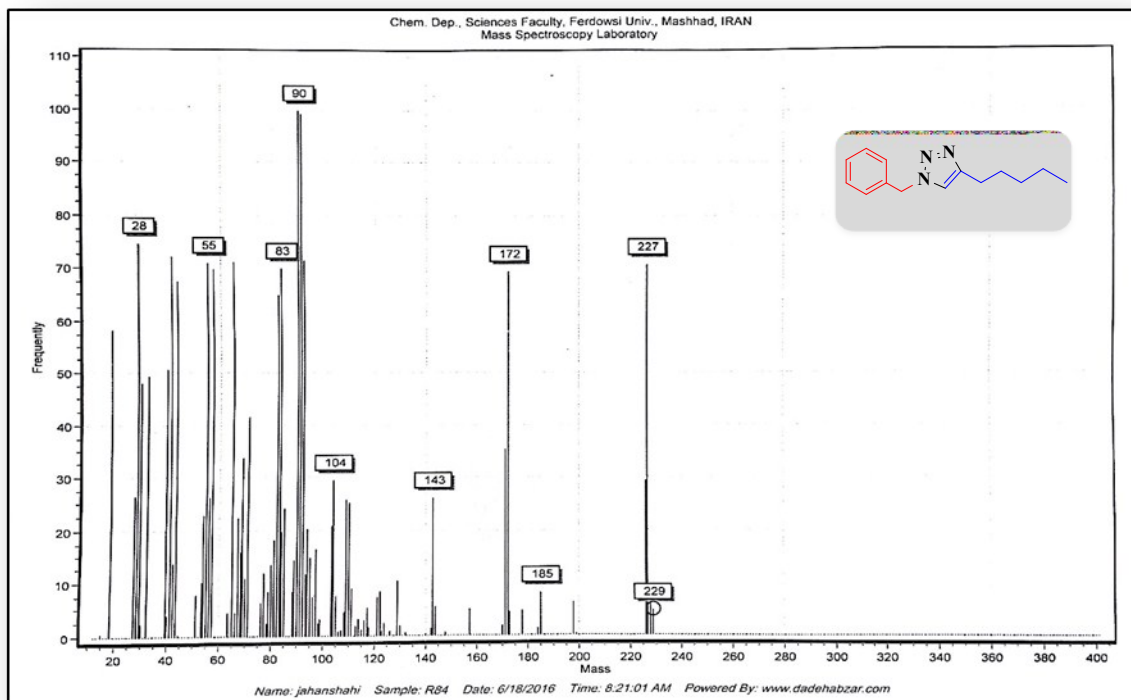

Figure 33: Mass spectrum of 1-benzyl-4-pentyl-1*H*-1,2,3-triazole (Table 3, Entry 10).



**1-(4-chlorobenzyl)-4-phenyl-1*H*-1,2,3-triazole (Table 3, Entry 11)** (0.26 g, 95%); white solid (crystals); mp 140–143 °C (from EtOH) (Lit.<sup>2</sup> 142–145 °C); FT-IR (KBr):  $\nu_{\text{max}}/\text{cm}^{-1}$  3113, 3083, 3064, 3035, 2933, 1491, 1462 (CH<sub>2</sub>), 1411, 1356, 1220 (N–N=N–), 1139 (C–N), 1093, 1080, 1015, 972, 821 (=C–H oop, triazole ring), 805, 764, 688, 497; <sup>1</sup>H NMR:  $\delta$ H (300 MHz; CDCl<sub>3</sub>; Me<sub>4</sub>Si) 7.83 (2 H, d, *J* = 7.6 Hz, Ar-H), 7.69 (1 H, s, C=CH), 7.46–7.32 (5 H, m, Ar-H), 7.27 (2 H, d, *J* = 8.7 Hz, Ar-H), 5.58 (2 H, s, CH<sub>2</sub>); MS, *m/z* 269 (M<sup>+</sup>, 7%), 271 (2, M + 2), 268 (33, M – H), 266 (75, M – 3 H), 125 (80, M – C<sub>8</sub>H<sub>6</sub>N<sub>3</sub>), 116 (92, M – C<sub>7</sub>H<sub>6</sub>ClN<sub>2</sub>), 102 (66, M – C<sub>7</sub>H<sub>6</sub>ClN<sub>3</sub>), 89 (87), 77 (65, M – C<sub>9</sub>H<sub>7</sub>ClN<sub>3</sub>), 39 (75), 28 (62, M – C<sub>15</sub>H<sub>12</sub>ClN).

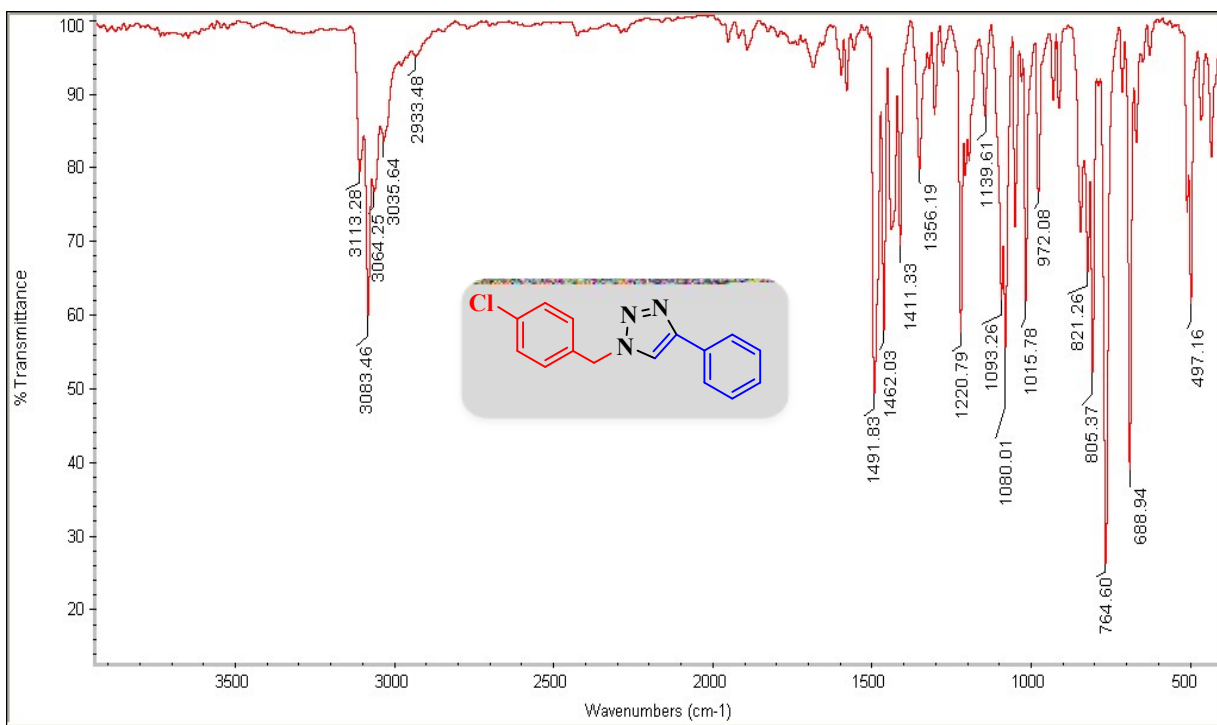

**Figure 34:** FT-IR (KBr) of 1-(4-chlorobenzyl)-4-phenyl-1*H*-1,2,3-triazole (Table 3, Entry 11).

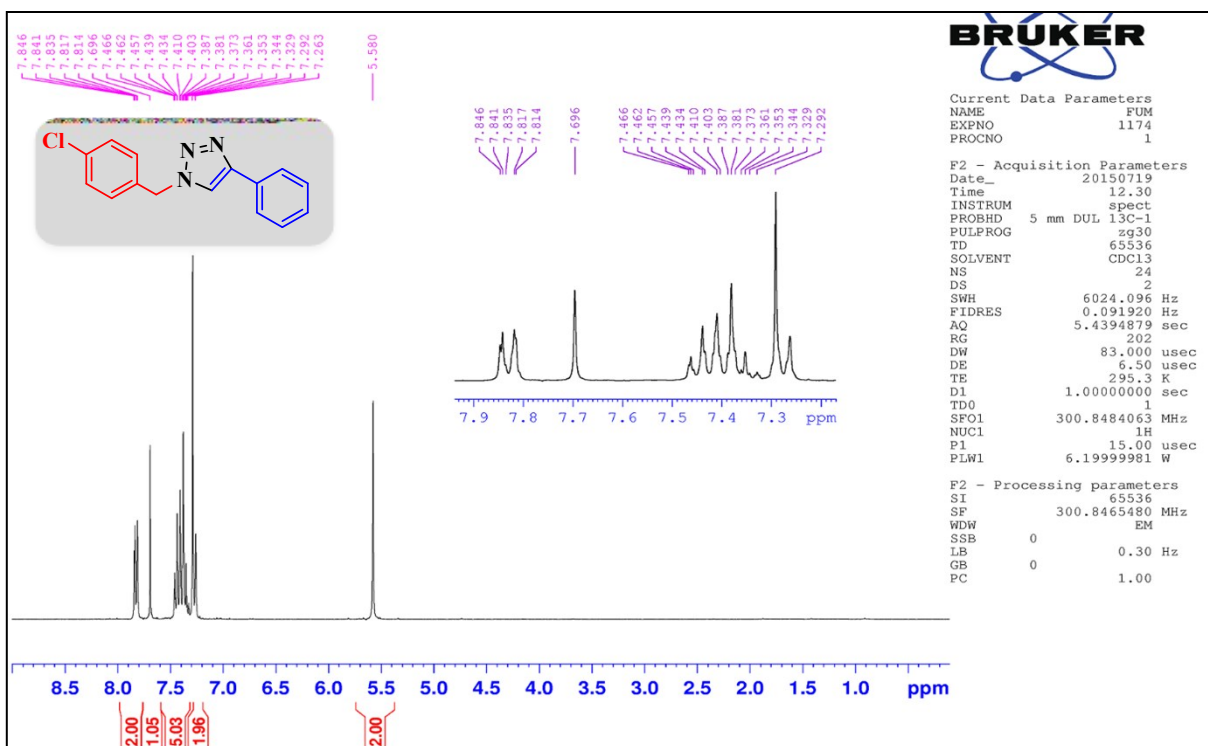

**Figure 35:**  $^1\text{H}$  NMR (300 MHz,  $\text{CDCl}_3$ ) of 1-(4-chlorobenzyl)-4-phenyl-1*H*-1,2,3-triazole (Table 3, Entry 11).

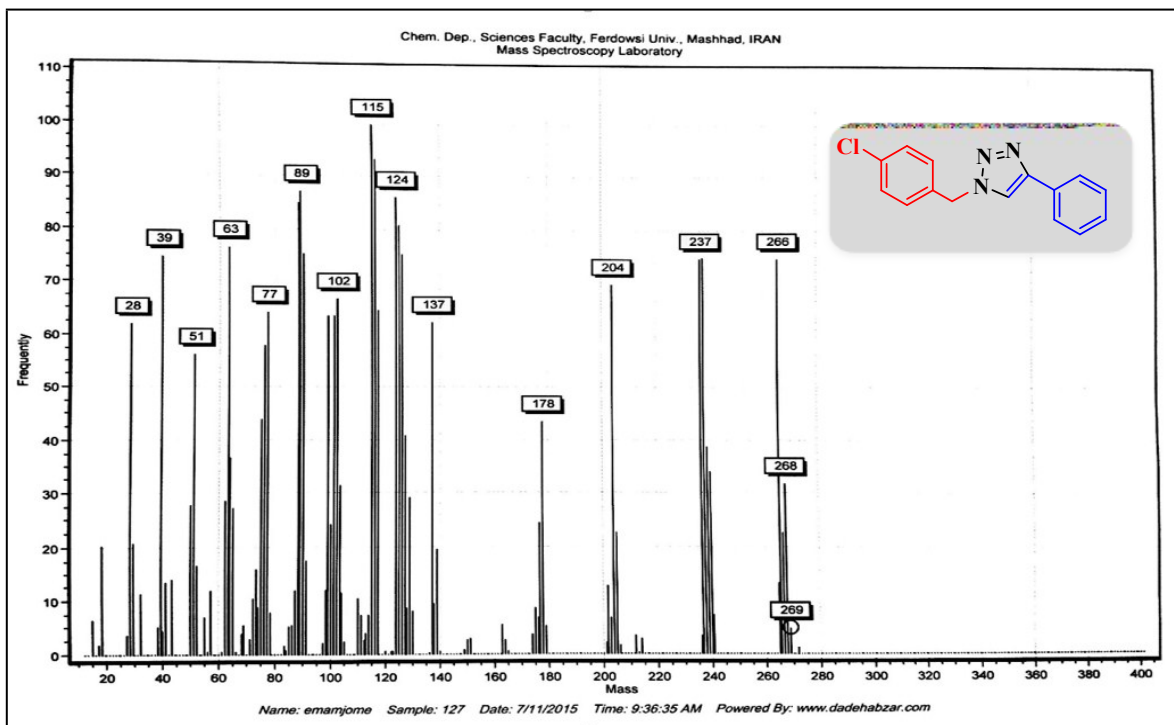

**Figure 36:** Mass spectrum of 1-(4-chlorobenzyl)-4-phenyl-1*H*-1,2,3-triazole (Table 3, Entry 11).

**1-(4-chlorobenzyl)-4-(*p*-tolyl)-1*H*-1,2,3-triazole (Table 3, Entry 12)** (0.26 g, 91%); white solid (crystals); mp 141–142 °C (from EtOH) (Lit.<sup>2</sup> 140–143 °C); FT-IR (KBr):  $\nu_{\text{max}}/\text{cm}^{-1}$  3117, 3090, 3047, 2921, 1492, 1454 (CH<sub>2</sub>), 1410, 1356, 1220 (N–N=N–), 1170 (C–N), 1081, 1047, 1015, 976, 818 (=C–H oop, triazole ring), 767, 517; <sup>1</sup>H NMR:  $\delta$ H (300 MHz; CDCl<sub>3</sub>; Me<sub>4</sub>Si) 7.71 (2 H, d, *J* = 8.1 Hz, Ar-H), 7.65 (1 H, s, C=CH), 7.39 (2 H, d, *J* = 8.4 Hz, Ar-H), 7.29–7.23 (4 H, m, Ar-H), 5.56 (2 H, s, CH<sub>2</sub>), 2.39 (3 H, s, CH<sub>3</sub>); MS, *m/z* 283 (M<sup>+</sup>, 25%), 285 (8, M + 2), 282 (40, M – H), 281 (85, M – 2 H), 125 (85, M – C<sub>9</sub>H<sub>8</sub>N<sub>3</sub>), 116 (60, M – C<sub>7</sub>H<sub>6</sub>ClN<sub>3</sub>), 89 (85), 77 (85, M – (C<sub>9</sub>H<sub>7</sub>ClN<sub>3</sub> + CH<sub>3</sub>)), 28 (82, M – C<sub>16</sub>H<sub>14</sub>ClN), 15 (38, M – C<sub>15</sub>H<sub>11</sub>ClN<sub>3</sub>).

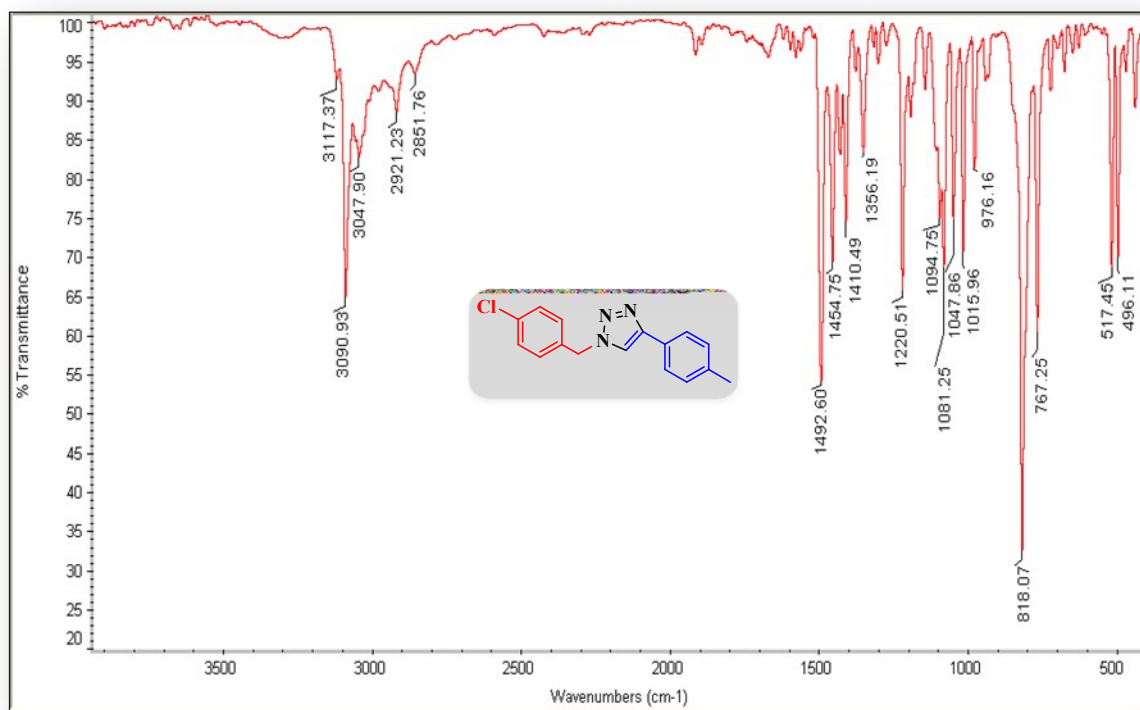

**Figure 37:** FT-IR (KBr) of 1-(4-chlorobenzyl)-4-(*p*-tolyl)-1*H*-1,2,3-triazole (Table 3, Entry 12).

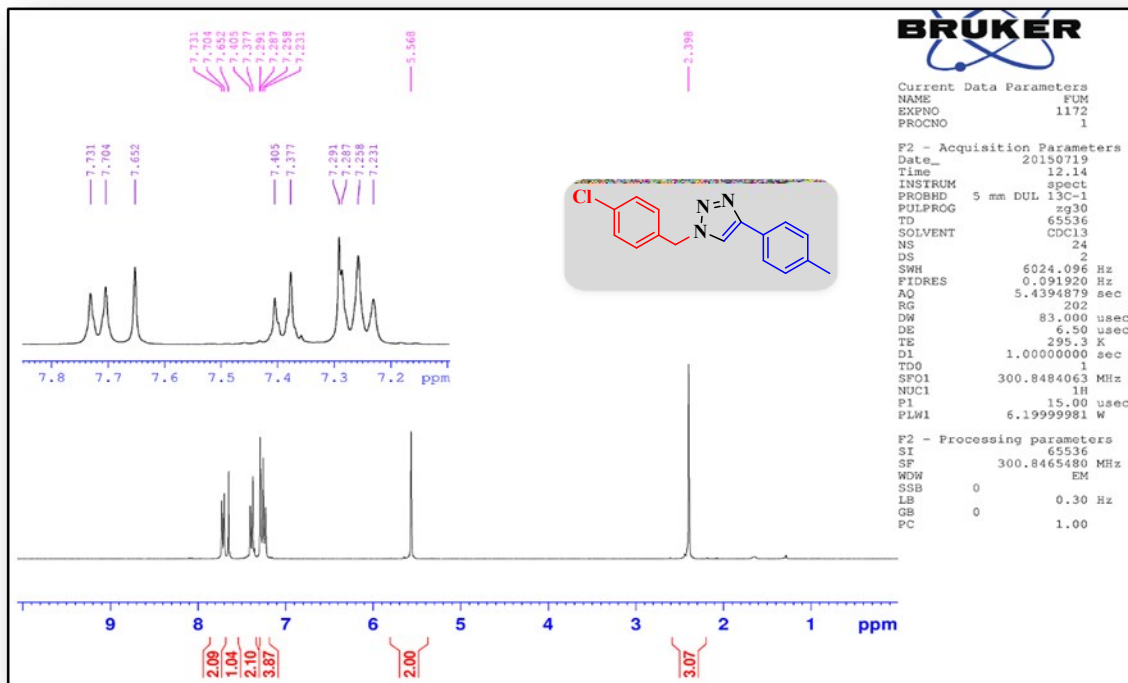

**Figure 38:**  $^1\text{H}$  NMR (300 MHz,  $\text{CDCl}_3$ ) of 1-(4-chlorobenzyl)-4-(*p*-tolyl)-1*H*-1,2,3-triazole (Table 3, Entry 12).

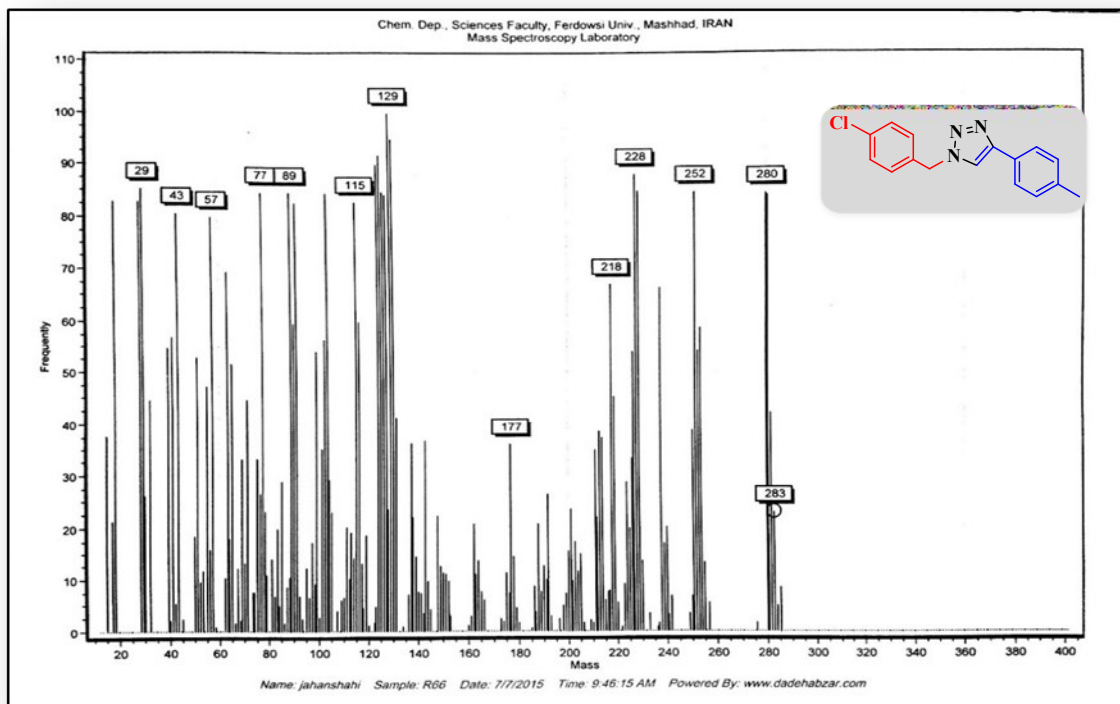

**Figure 39:** Mass spectrum of 1-(4-chlorobenzyl)-4-(*p*-tolyl)-1*H*-1,2,3-triazole (Table 3, Entry 12).

**1-(4-chlorobenzyl)-4-(4-methoxyphenyl)-1*H*-1,2,3-triazole (Table 3, Entry 13)** (0.26 g, 87%); white solid (crystals); mp 150-151 °C (from EtOH) (Lit.<sup>10</sup> 150–152 °C); elemental analysis: Found: C, 63.99; H, 4.65; N, 13.92. Calc. for C<sub>16</sub>H<sub>14</sub>ClN<sub>3</sub>O: C, 64.11; H, 4.71; N, 14.02%; FT-IR (KBr):  $\nu_{\text{max}}/\text{cm}^{-1}$  3121, 3091, 3019, 2958, 2933, 2835, 1616, 1561, 1493, 1453 (CH<sub>2</sub>), 1434, 1351, 1302, 1255 (N–N=N–), 1218, 1175 (C–N), 1030, 1016, 976, 818 (=C–H oop, triazole ring), 765; <sup>1</sup>H NMR:  $\delta$ H (300 MHz; CDCl<sub>3</sub>; Me<sub>4</sub>Si) 7.76–7.28 (7 H, m, Ar-H, C=CH), 6.96 (2 H, d, *J* = 6.3 Hz, Ar-H), 5.55 (2 H, s, CH<sub>2</sub>), 2.86 (3 H, s, CH<sub>3</sub>); <sup>13</sup>C NMR:  $\delta$ C (75 MHz; CDCl<sub>3</sub>; Me<sub>4</sub>Si) 159, 148, 134, 133, 129, 127, 123, 118, 114, 55, 53; MS, *m/z* 299 (M<sup>+</sup>, 5%), 301 (2, M + 2), 298 (43, M – H), 297 (95, M – 2 H), 267 (96, M – CH<sub>3</sub>O), 146 (42, M – C<sub>7</sub>H<sub>6</sub>ClN<sub>2</sub>), 125 (90, M – C<sub>9</sub>H<sub>8</sub>N<sub>3</sub>O), 89 (95), 76 (91, M – (CH<sub>3</sub>O + C<sub>9</sub>H<sub>7</sub>ClN<sub>3</sub>)), 28 (55, M – C<sub>16</sub>H<sub>14</sub>ClNO).

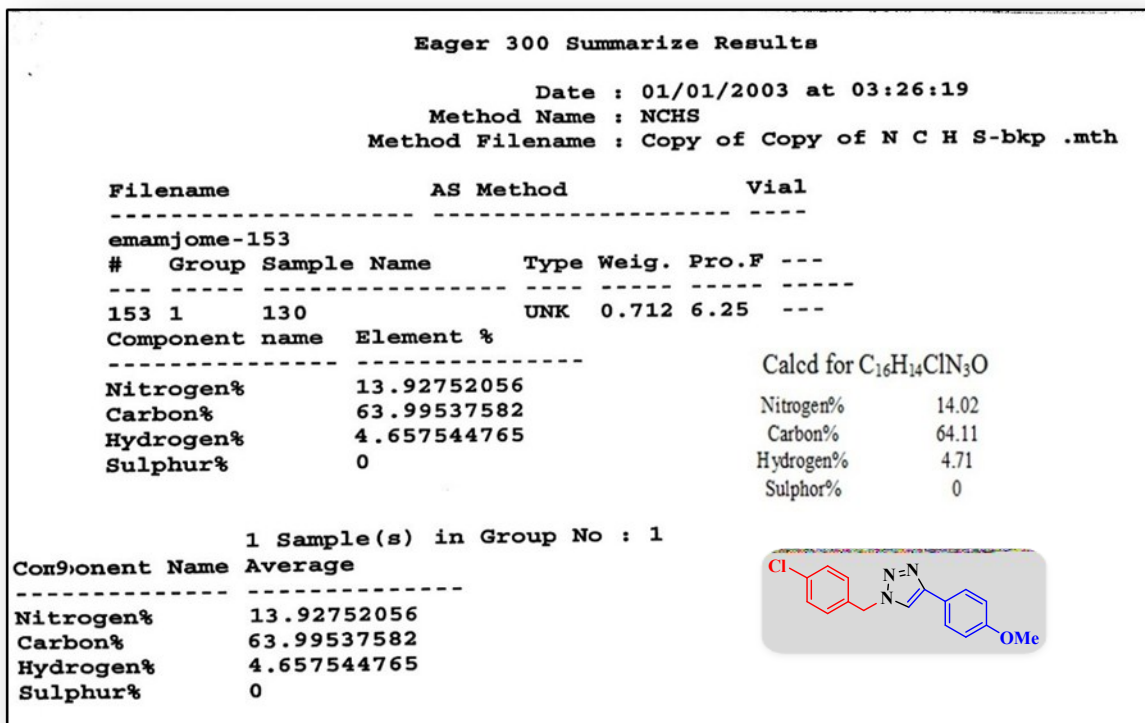

**Figure 40:** Elemental analysis of 1-(4-chlorobenzyl)-4-(4-methoxyphenyl)-1*H*-1,2,3-triazole (Table 3, Entry 13).

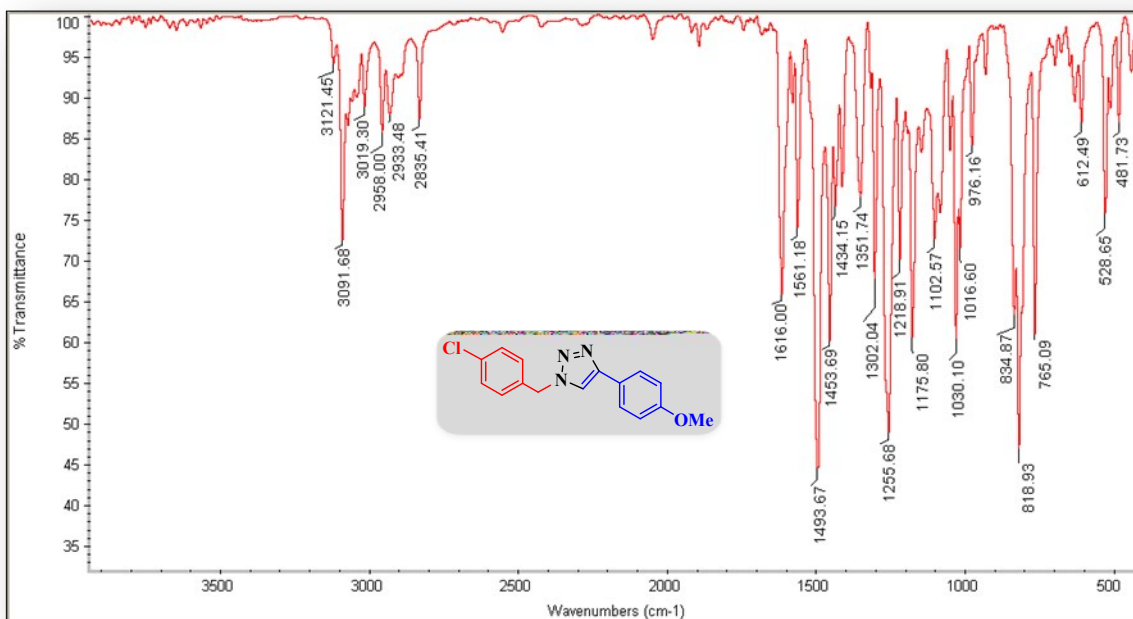

**Figure 41:** FT-IR (KBr) of 1-(4-chlorobenzyl)-4-(4-methoxyphenyl)-1*H*-1,2,3-triazole (Table 3, Entry 13).

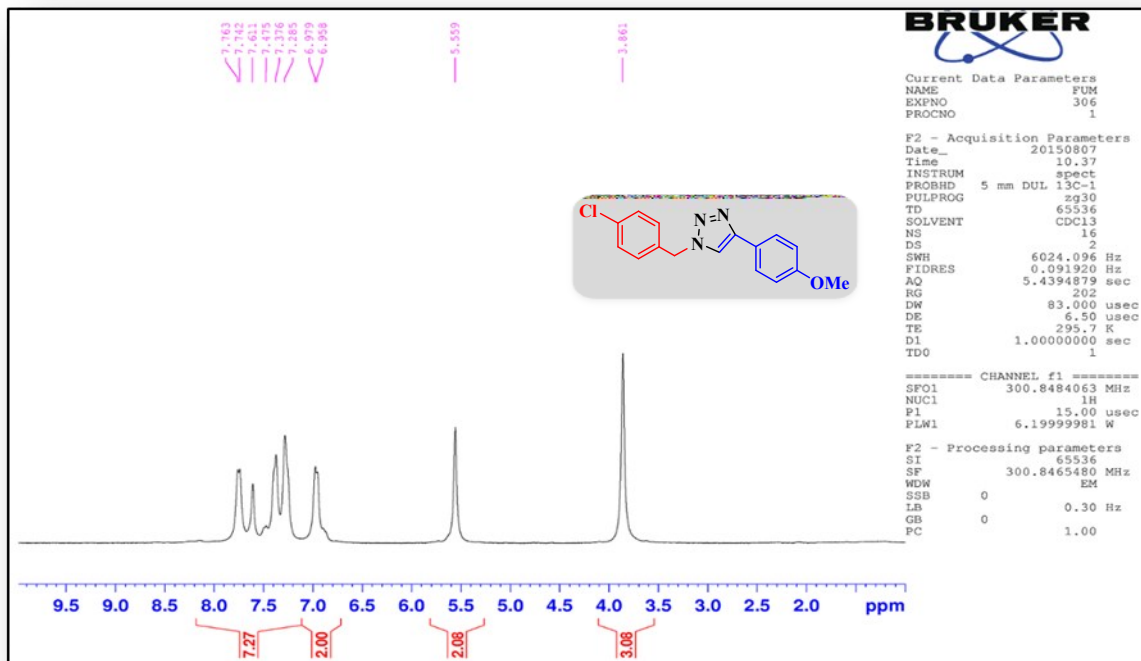

**Figure 42:**  $^1\text{H}$  NMR (300 MHz,  $\text{CDCl}_3$ ) of 1-(4-chlorobenzyl)-4-(4-methoxyphenyl)-1H-1,2,3-triazole (Table 3, Entry 13).

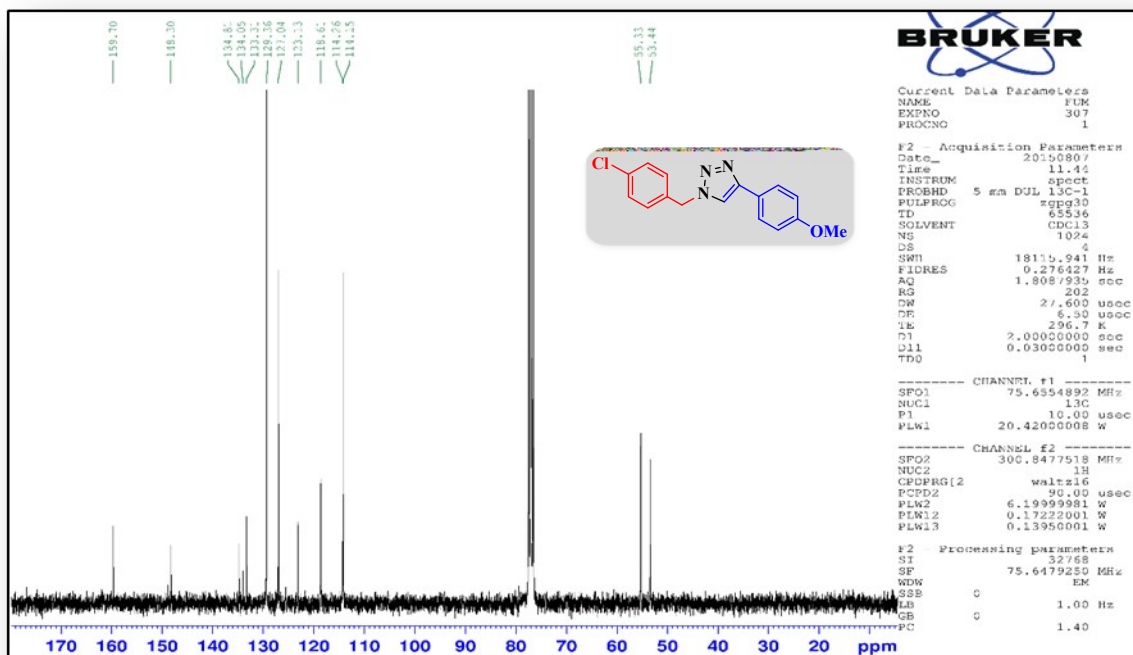

**Figure 43:**  $^{13}\text{C}$  NMR (75MHz,  $\text{CDCl}_3$ ) of 1-(4-chlorobenzyl)-4-(4-methoxyphenyl)-1H-1,2,3-triazole (Table 3, Entry 13).

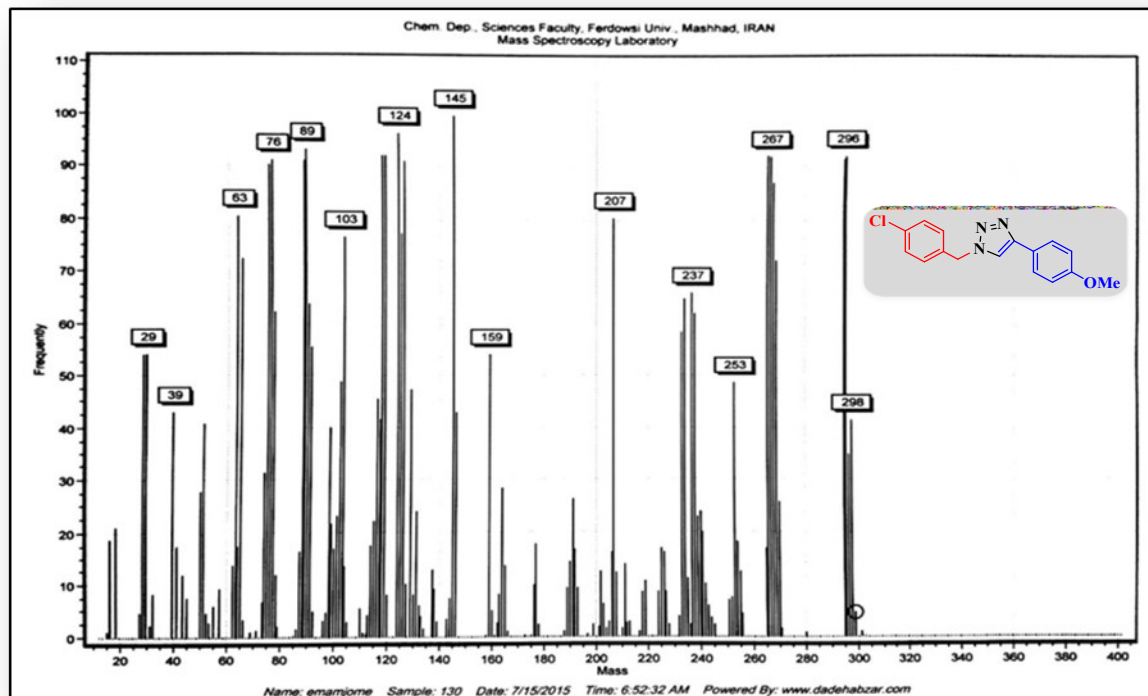

**Figure 44:** Mass spectrum of 1-(4-chlorobenzyl)-4-(4-methoxyphenyl)-1*H*-1,2,3-triazole (Table 3, Entry 13).  
**4-(4-(*tert*-butyl)phenyl)-1-(4-chlorobenzyl)-1*H*-1,2,3-triazole** (Table 3, Entry 14) (0.29 g, 88%); white solid (crystals); mp 153-154°C (from EtOH) (Lit.<sup>10</sup> 153–154 °C); elemental analysis: Found: C, 69.94; H, 5.93; N, 12.63. Calc. for C<sub>19</sub>H<sub>20</sub>ClN<sub>3</sub>: C, 70.04; H, 6.19; N, 12.90%; FT-IR (KBr):  $\nu_{\max}/\text{cm}^{-1}$  3133, 2959, 2904, 2868, 1492, 1457 (CH<sub>2</sub>), 1427, 1361, 1224 (N=N=N-), 1157 (C-N), 1049, 1014, 976, 833 (=C-H oop, triazole ring), 806, 776, 560; <sup>1</sup>H NMR:  $\delta$ H (300 MHz; CDCl<sub>3</sub>; Me<sub>4</sub>Si) 7.75 (2 H, d, *J* = 8.4 Hz, Ar-H), 7.67 (1 H, s, C=CH), 7.45 (2 H, d, *J* = 8.4 Hz, Ar-H), 7.37 (2 H, d, *J* = 8.4 Hz, Ar-H), 7.26 (2 H, t, *J* = 8.4 Hz, Ar-H), 5.55 (2 H, s, CH<sub>2</sub>), 1.36 (9 H, s, 3 CH<sub>3</sub>); <sup>13</sup>C NMR:  $\delta$ C (75 MHz; CDCl<sub>3</sub>; Me<sub>4</sub>Si) 151, 148, 134, 133, 129, 127, 125, 119, 53, 34, 31; MS, *m/z* 325 (M<sup>+</sup>, 64%), 327 (19, M + 2), 324 (65, M - H), 323 (69, M - 2 H), 172 (91, M - C<sub>7</sub>H<sub>6</sub>ClN<sub>2</sub>), 173 (61, M - C<sub>8</sub>H<sub>7</sub>ClN), 125 (92, M - C<sub>12</sub>H<sub>14</sub>N<sub>3</sub>), 77 (63, M - (C<sub>13</sub>H<sub>16</sub>N<sub>3</sub> + Cl)), 57 (67, M - C<sub>15</sub>H<sub>11</sub>ClN<sub>3</sub>), 28 (63, M - N<sub>2</sub>).



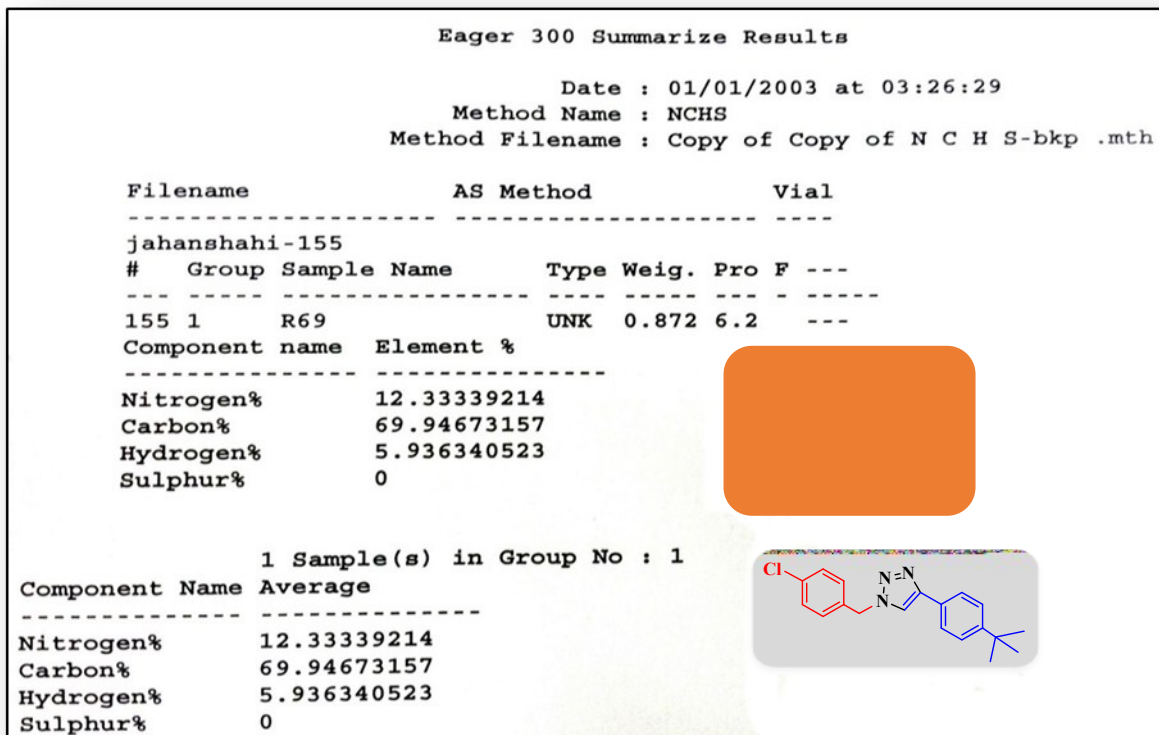

**Figure 45:** Elemental analysis of 4-(4-(*tert*-butyl)phenyl)-1-(4-chlorobenzyl)-1*H*-1,2,3-triazole (Table 3, Entry 14).

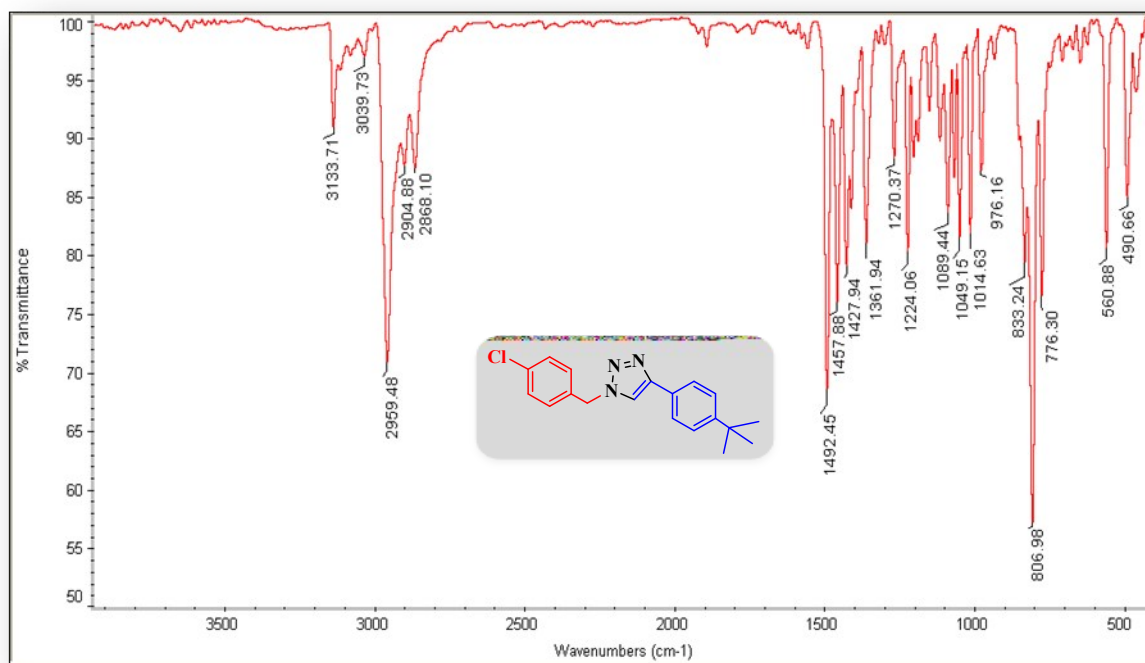

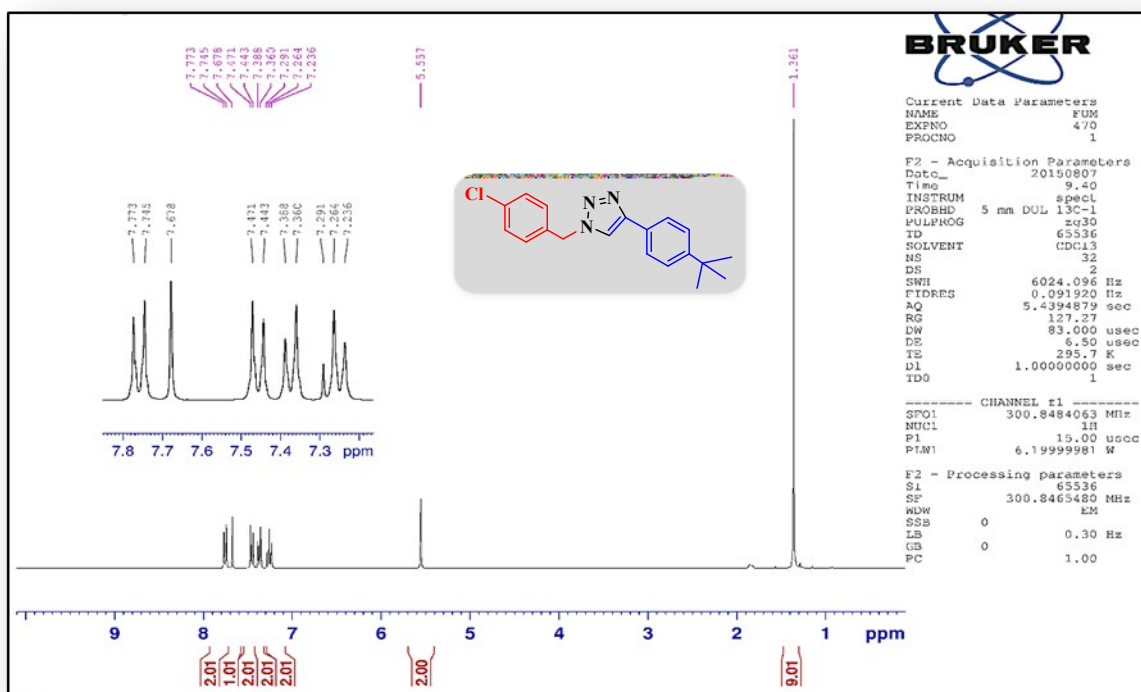

**Figure 47:**  $^1\text{H}$  NMR (300 MHz,  $\text{CDCl}_3$ ) of 4-(4-(*tert*-butyl)phenyl)-1-(4-chlorobenzyl)-1*H*-1,2,3-triazole (Table 3, Entry 14).

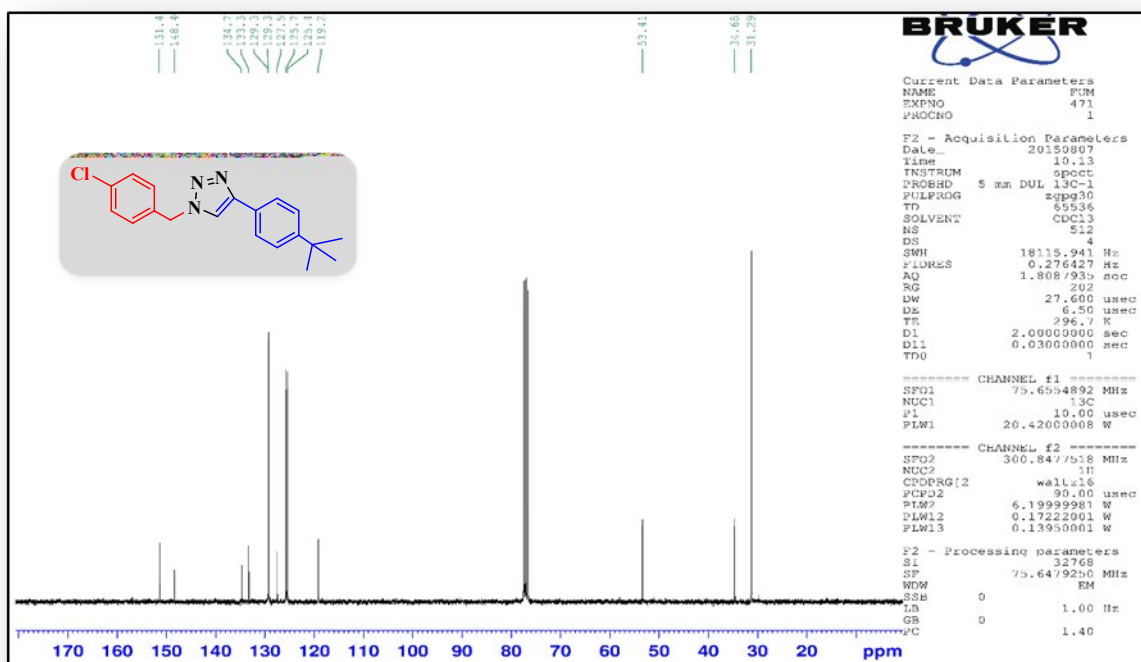

**Figure 48:**  $^{13}\text{C}$  NMR (75MHz,  $\text{CDCl}_3$ ) of 4-(4-(*tert*-butyl)phenyl)-1-(4-chlorobenzyl)-1*H*-1,2,3-triazole (Table 3, Entry 14).

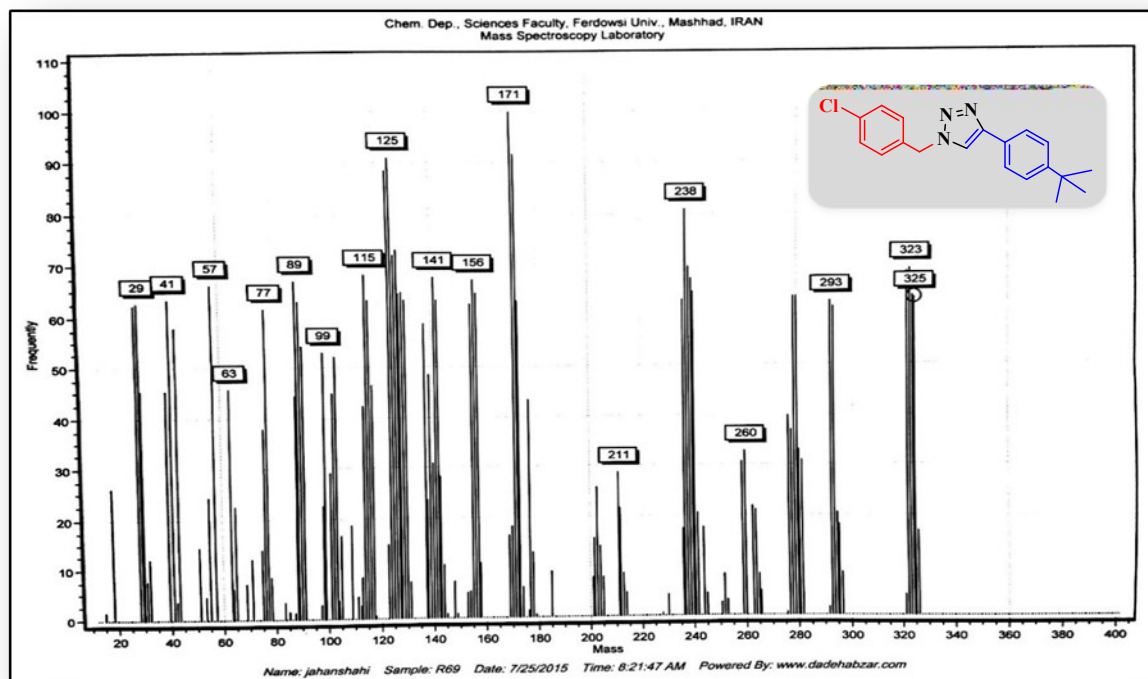

**Figure 49:** Mass spectrum of 4-(4-(*tert*-butyl)phenyl)-1-(4-chlorobenzyl)-1*H*-1,2,3-triazole (Table 3, Entry 14).

**2-(1-(4-chlorobenzyl)-1*H*-1,2,3-triazol-4-yl)pyridine (Table 3, Entry 15)** (0.20 g, 74 %); yellow solid (crystals); mp 113–114 °C (from EtOH) (Lit.<sup>2</sup> 115–117 °C); FT-IR (KBr):  $\nu_{\text{max}}/\text{cm}^{-1}$  3113, 3088, 3060, 2925, 2855, 1595, 1568, 1491, 1469 (CH<sub>2</sub>), 1419, 1325, 1224 (N–N=N–), 1147 (C–N), 1080, 1046, 1015, 994, 805 (=C–H oop, triazole ring), 784, 768, 739, 677; <sup>1</sup>H NMR:  $\delta$ H (300 MHz; CDCl<sub>3</sub>; Me<sub>4</sub>Si) 8.56 (1 H, d, *J* = 4.2 Hz, Py-H), 8.20 (1 H, d, *J* = 7.8 Hz, Py-H), 8.07 (1 H, s, C=CH), 7.79 (1 H, td, *J*<sub>1</sub> = 7.65 Hz, *J*<sub>2</sub> = 1.8 Hz, Py-H), 7.39–7.22 (5 H, m, Ar-H), 5.58 (2 H, s, CH<sub>2</sub>); <sup>13</sup>C NMR:  $\delta$ C (75 MHz; CDCl<sub>3</sub>; Me<sub>4</sub>Si) 150, 149, 148, 136, 134, 132, 129.61, 129.41, 122, 121, 120, 53; MS, *m/z* 270 (M<sup>+</sup>, 40%), 272 (13, M + 2), 269 (43, M – H), 268 (55, M – 2 H), 242 (43, M – N<sub>2</sub>), 125 (100, M – C<sub>7</sub>H<sub>5</sub>N<sub>4</sub>), 117 (96, M – C<sub>7</sub>H<sub>6</sub>ClN<sub>2</sub>), 99 (75, M – (C<sub>8</sub>H<sub>7</sub>N<sub>4</sub> + Cl)), 103 (50, M – C<sub>7</sub>H<sub>6</sub>ClN<sub>3</sub>), 90 (88), 78 (75, M – C<sub>9</sub>H<sub>7</sub>ClN<sub>3</sub>), 28 (50, M – C<sub>14</sub>H<sub>11</sub>ClN<sub>2</sub>).

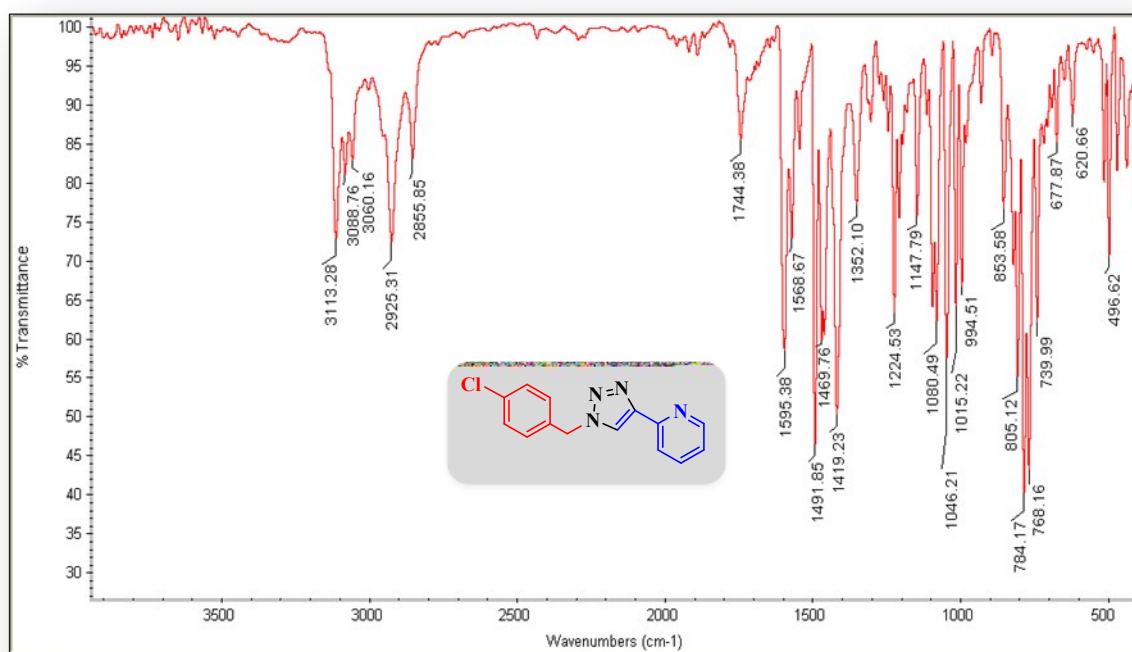

**Figure 50:** FT-IR (KBr) of 2-(1-(4-chlorobenzyl)-1*H*-1,2,3-triazol-4-yl)pyridine (Table 3, Entry 15).

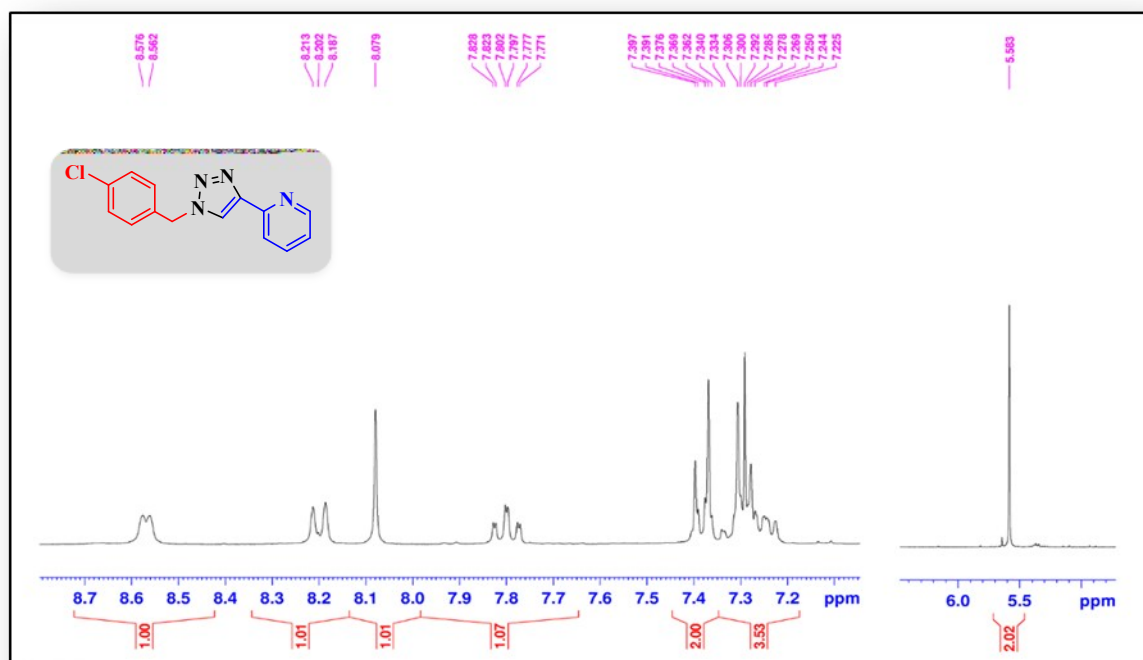

**Figure 51:** <sup>1</sup>H NMR (300 MHz, CDCl<sub>3</sub>) of 2-(1-(4-chlorobenzyl)-1*H*-1,2,3-triazol-4-yl)pyridine (Table 3, Entry 15).

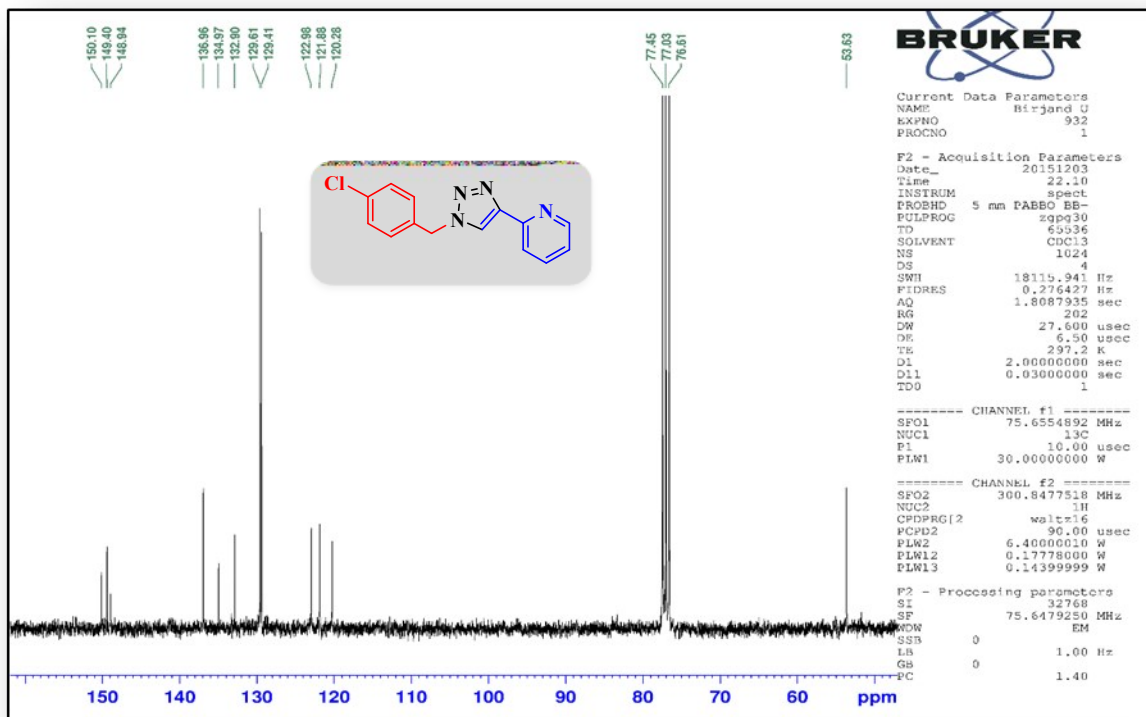

**Figure 52:**  $^{13}\text{C}$  NMR (75MHz,  $\text{CDCl}_3$ ) of 2-(1-(4-chlorobenzyl)-1*H*-1,2,3-triazol-4-yl)pyridine (Table 3, Entry 15).

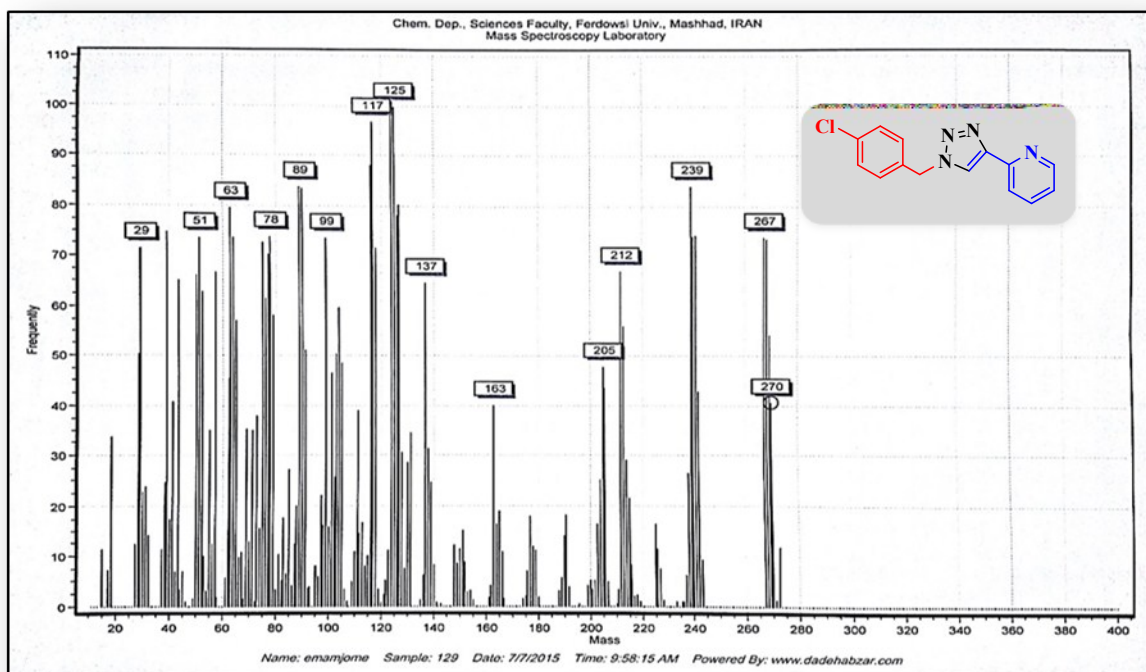

**Figure 53:** Mass spectrum of 2-(1-(4-chlorobenzyl)-1*H*-1,2,3-triazol-4-yl)pyridine (Table 3, Entry 15).

**1-(4-nitrobenzyl)-4-phenyl-1*H*-1,2,3-triazole (Table 3, Entry 16)** (0.23 g, 85%); white solid (crystals); mp 157–158 °C (from EtOH) (Lit.<sup>11</sup> 156–157 °C); FT-IR (KBr):  $\nu_{\text{max}}/\text{cm}^{-1}$  3126, 3080, 2962, 2855, 1607, 1517, 1462 (CH<sub>2</sub>), 1443, 1348, 1218 (N–N=N–), 1186 (C–N), 1071, 1046, 1016, 972, 861, 806 (=C–H oop, triazole ring), 764, 726, 693, 513; <sup>1</sup>H NMR:  $\delta$ H (300 MHz; CDCl<sub>3</sub>; Me<sub>4</sub>Si) 8.25 (2 H, d, *J* = 8.7 Hz, Ar-H), 7.84 (2 H, d, *J* = 8.7 Hz, Ar-H), 7.79 (1 H, s, C=CH), 7.48-7.29 (5 H, m, Ar-H), 5.72 (2 H, s, CH<sub>2</sub>); MS, *m/z* 280 (M<sup>+</sup>, 5%), 279 (21, M – H), 278 (86, M – 2 H), 204 (40, M – C<sub>6</sub>H<sub>5</sub>), 177 (18, M – C<sub>7</sub>H<sub>5</sub>N), 135 (41, M – C<sub>8</sub>H<sub>6</sub>N<sub>3</sub>), 116 (100, M – C<sub>7</sub>H<sub>6</sub>N<sub>3</sub>O<sub>2</sub>), 78 (85, M – C<sub>9</sub>H<sub>7</sub>N<sub>4</sub>O<sub>2</sub>), 29 (72, M – C<sub>15</sub>H<sub>12</sub>N<sub>2</sub>O<sub>2</sub>).

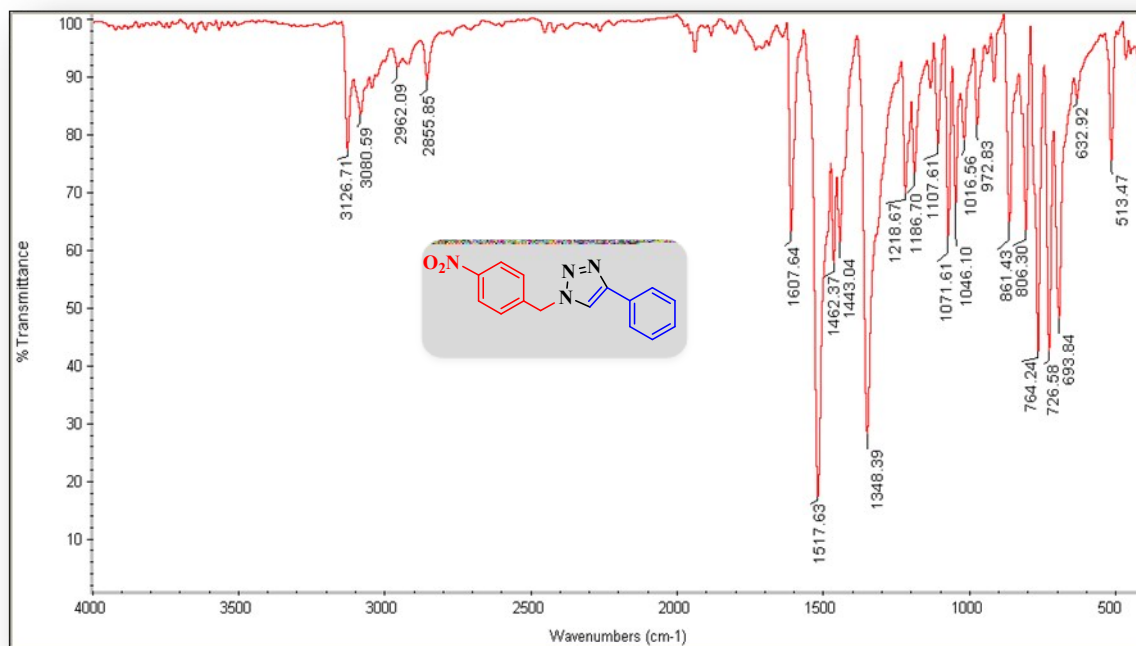

**Figure 45:** FT-IR (KBr) of 1-(4-nitrobenzyl)-4-phenyl-1*H*-1,2,3-triazole (Table 3, Entry 16).

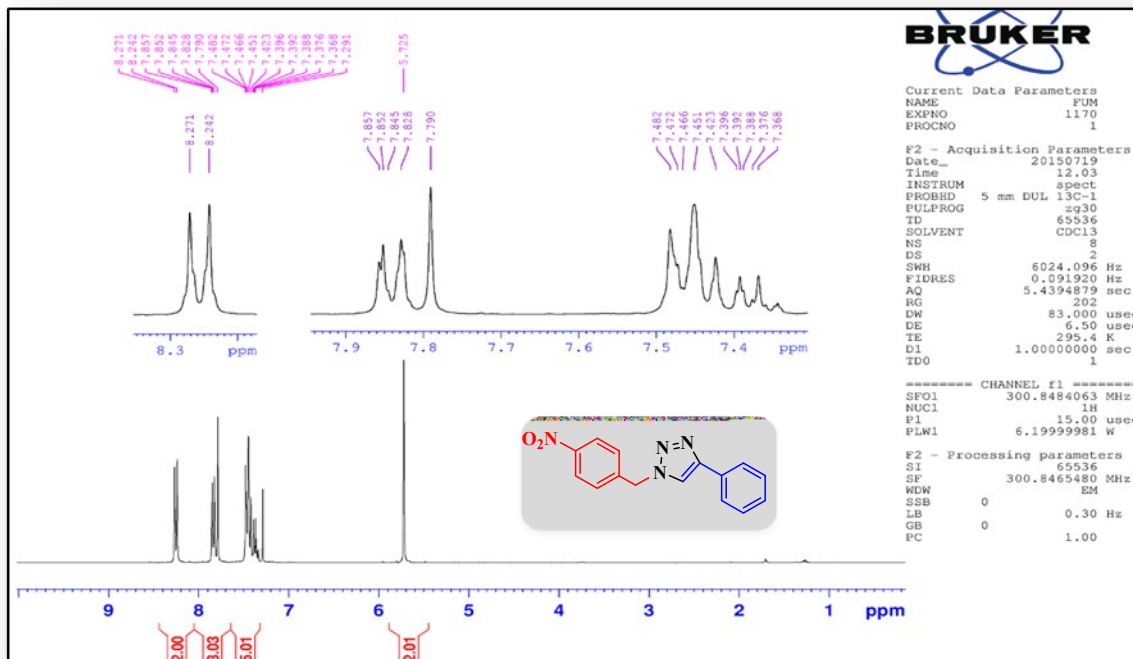

**Figure 55:**  $^1\text{H}$  NMR (300 MHz,  $\text{CDCl}_3$ ) of 1-(4-nitrobenzyl)-4-phenyl-1*H*-1,2,3-triazole (Table 3, Entry 16).

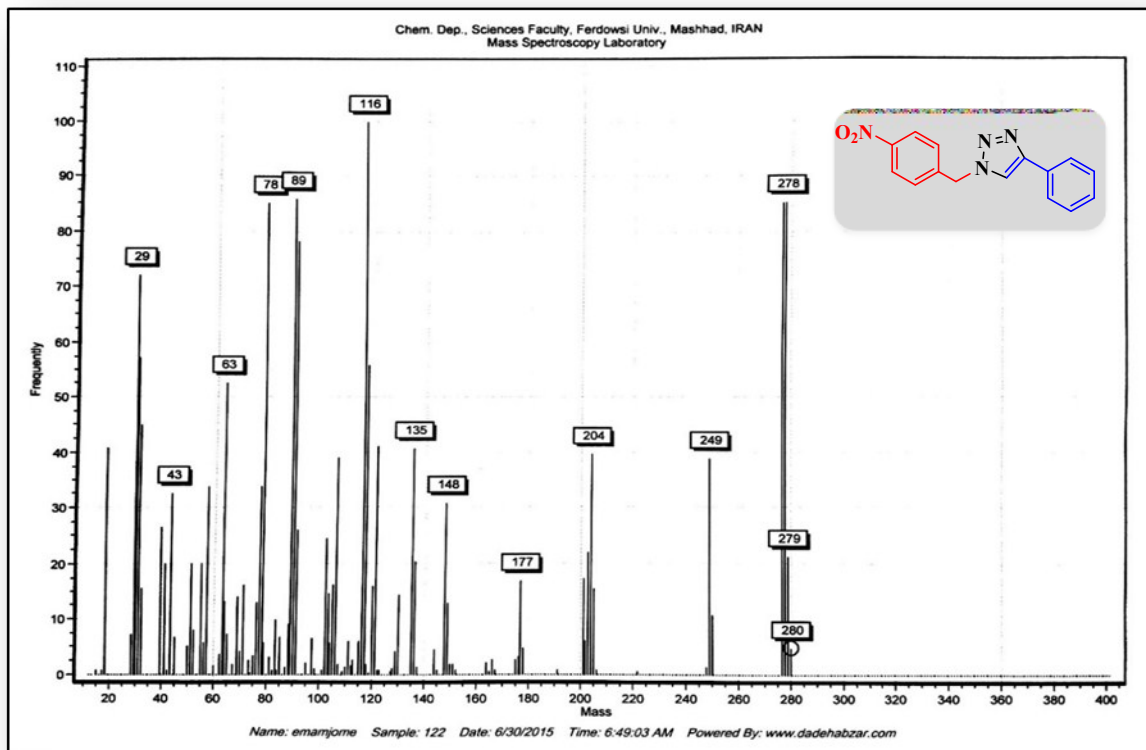

**Figure 56:** Mass spectrum of 1-(4-nitrobenzyl)-4-phenyl-1*H*-1,2,3-triazole (Table 3, Entry 16).

**1-(4-nitrobenzyl)-4-(*p*-tolyl)-1*H*-1,2,3-triazole (Table 3, Entry 17)** (0.24 g, 84%); white solid (crystals); mp 145–146 °C (from EtOH) (Lit.<sup>12</sup> 145–147 °C); FT-IR (KBr):  $\nu_{\max}/\text{cm}^{-1}$  3094, 3051, 2925, 2855, 1603, 1515, 1455 (CH<sub>2</sub>), 1429, 1348, 1287, 1222 (N–N=N–), 1110 (C–N), 1043, 980, 845, 818 (=C–H oop, triazole ring), 801, 730, 514; MS,  $m/z$  294 (M<sup>+</sup>, 5%), 293 (20, M – H), 292 (78, M – 2 H), 249 (43, M – NO<sub>2</sub>), 204 (29, M – C<sub>7</sub>H<sub>7</sub>), 177 (55, M – C<sub>8</sub>H<sub>7</sub>N), 135 (77, M – C<sub>9</sub>H<sub>8</sub>N<sub>3</sub>), 130 (100, M – C<sub>7</sub>H<sub>6</sub>N<sub>3</sub>O<sub>2</sub>), 103 (83, M – C<sub>8</sub>H<sub>7</sub>N<sub>4</sub>O<sub>2</sub>), 91 (68, M – C<sub>9</sub>H<sub>7</sub>N<sub>4</sub>O<sub>2</sub>), 77 (93, M – (NO<sub>2</sub> + C<sub>10</sub>H<sub>10</sub>N<sub>3</sub>)), 29 (81, M – C<sub>16</sub>H<sub>14</sub>N<sub>2</sub>O<sub>2</sub>).



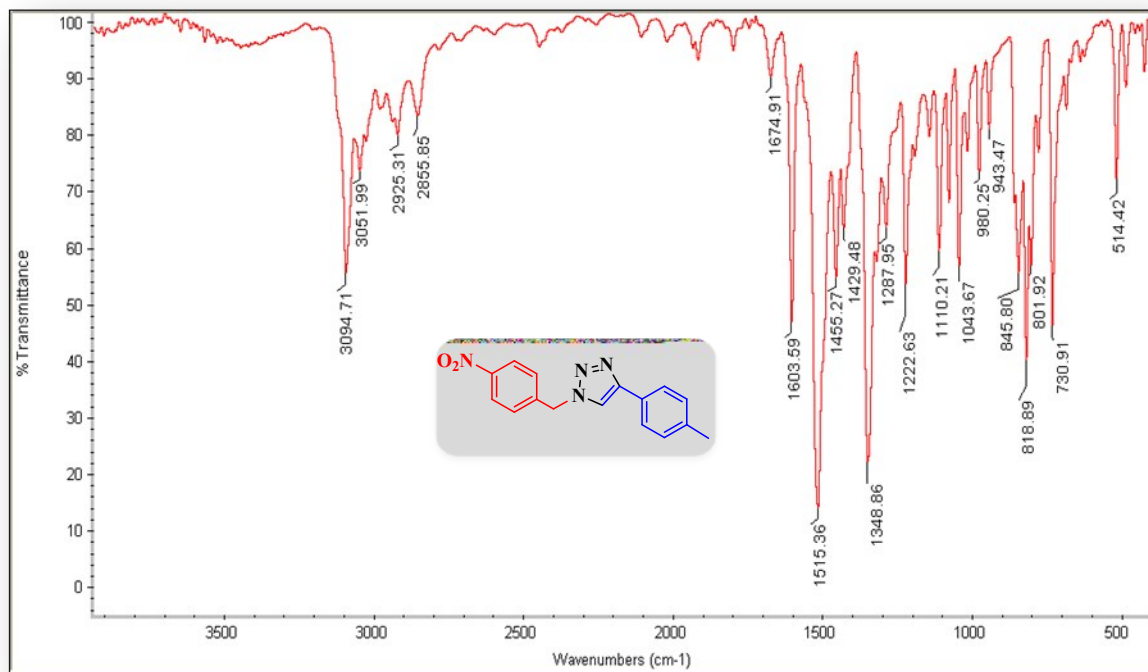

Figure 57: FT-IR (KBr) of 1-(4-nitrobenzyl)-4-(p-tolyl)-1H-1,2,3-triazole (Table 3, Entry 17).

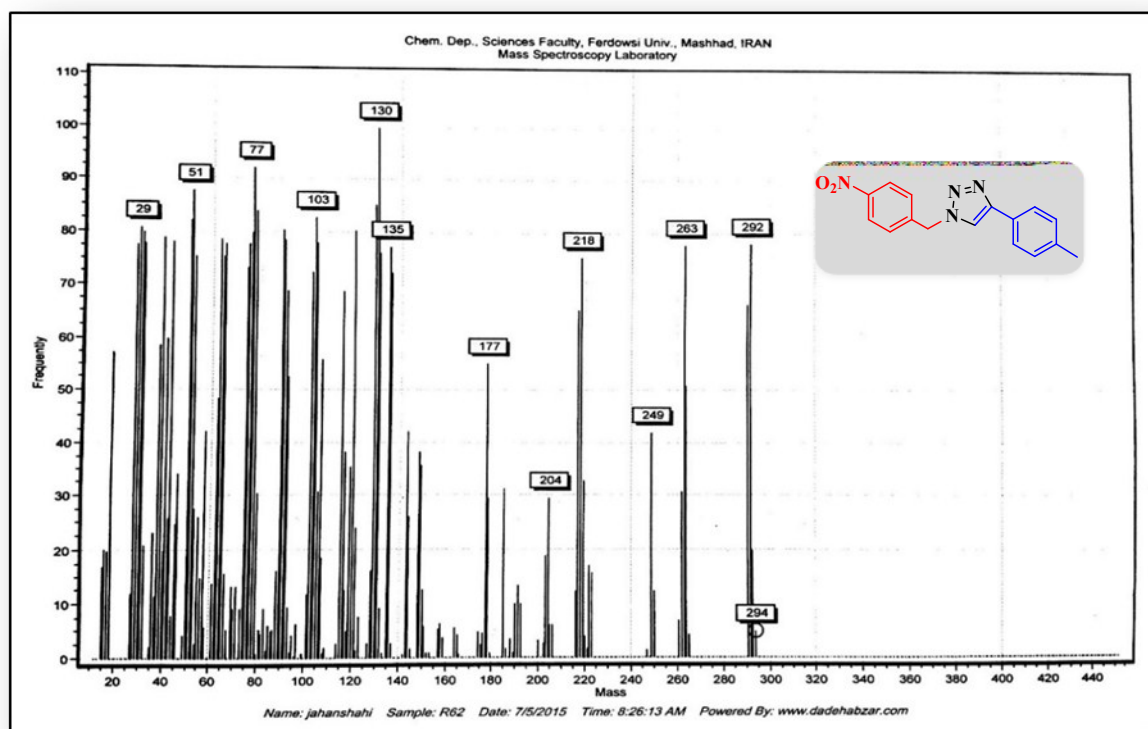

Figure 58: Mass spectrum of 1-(4-nitrobenzyl)-4-(p-tolyl)-1H-1,2,3-triazole (Table 3, Entry 17).

**4-(4-methoxyphenyl)-1-(4-nitrobenzyl)-1*H*-1,2,3-triazole (Table 3, Entry 18)** (0.27 g, 89%); white solid (crystals); mp 94–96 °C (from EtOH) (Lit.<sup>13</sup> 95–98 °C); FT-IR (KBr):  $\nu_{\max}/\text{cm}^{-1}$  3125, 3092, 3002, 2941, 2839, 1611, 1556, 1530, 1502, 1452 (CH<sub>2</sub>), 1343, 1248 (N–N=N–), 1222, 1174 (C–N), 1107, 1027, 980, 819 (=C–H oop, triazole ring), 845, 727, 608, 538; <sup>1</sup>H NMR:  $\delta$ H (300 MHz; CDCl<sub>3</sub>; Me<sub>4</sub>Si) 8.21 (2 H, d, *J* = 8.4 Hz, Ar-H), 7.84 (1 H, s, C=CH), 7.73 (2 H, d, *J* = 8.7 Hz, Ar-H), 7.43 (2 H, d, *J* = 8.4 Hz, Ar-H), 6.94 (2 H, d, *J* = 8.4 Hz, Ar-H), 5.68 (2 H, s, CH<sub>2</sub>), 3.83 (3 H, s, OCH<sub>3</sub>); MS, *m/z* 310 (M<sup>+</sup>, 5%), 309 (21, M – H), 308 (86, M – 2 H), 279 (95, M – CH<sub>3</sub>O), 265 (23, M – NO<sub>2</sub>), 146 (97, M – C<sub>7</sub>H<sub>6</sub>N<sub>3</sub>O<sub>2</sub>), 119 (44, M – C<sub>8</sub>H<sub>7</sub>N<sub>4</sub>O<sub>2</sub>), 77 (34, M – (NO<sub>2</sub> + C<sub>10</sub>H<sub>10</sub>N<sub>3</sub>O)), 29 (97, M – C<sub>16</sub>H<sub>14</sub>N<sub>2</sub>O<sub>3</sub>).

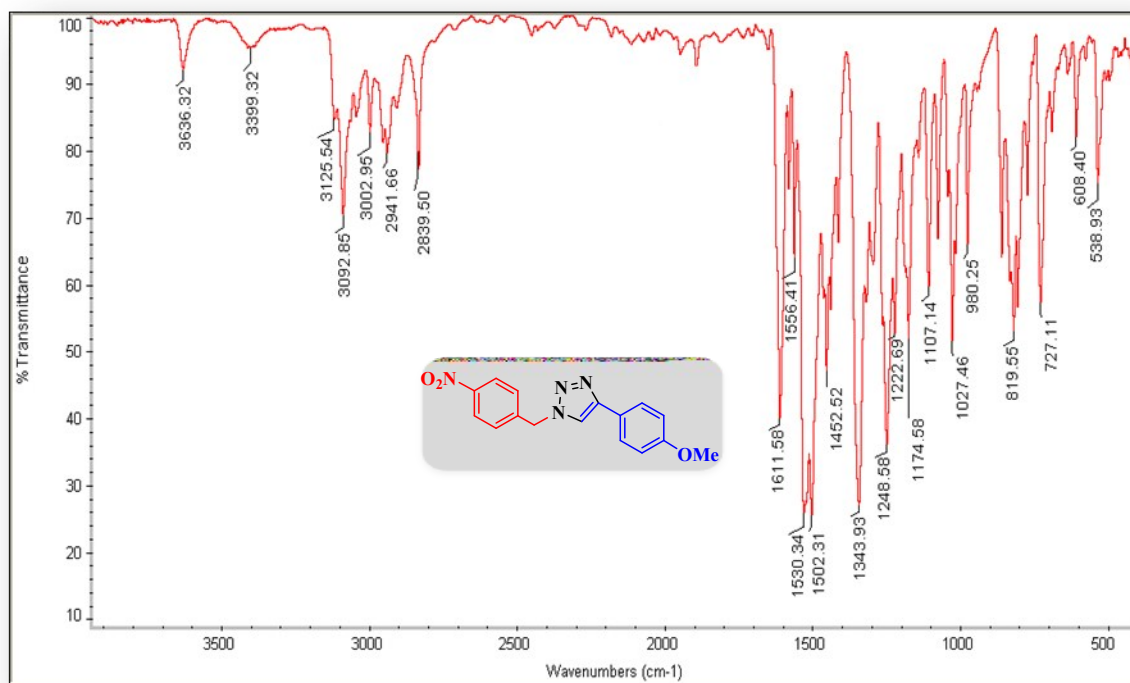

**Figure 59:** FT-IR (KBr) of 4-(4-methoxyphenyl)-1-(4-nitrobenzyl)-1*H*-1,2,3-triazole (Table 3, Entry 18).

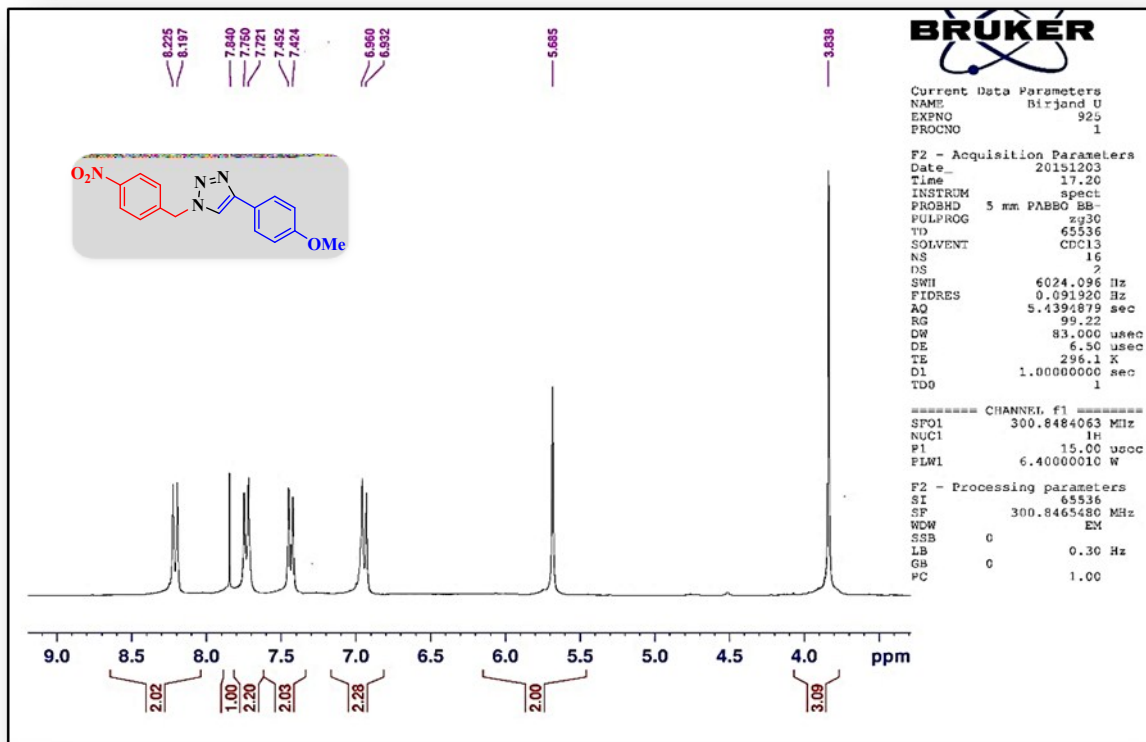

**Figure 60:**  $^1\text{H}$  NMR (300 MHz,  $\text{CDCl}_3$ ) of 4-(4-methoxyphenyl)-1-(4-nitrobenzyl)-1H-1,2,3-triazole (Table 3, Entry 18).

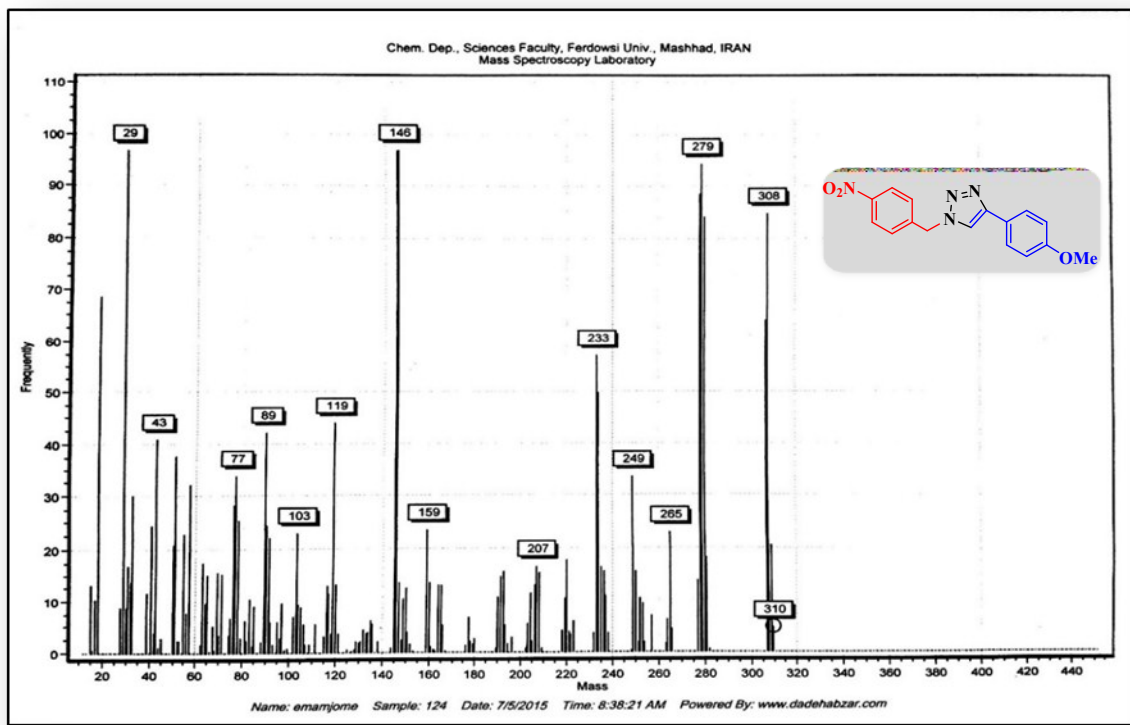

**Figure 61:** Mass spectrum of 4-(4-methoxyphenyl)-1-(4-nitrobenzyl)-1*H*-1,2,3-triazole (Table 3, Entry 18).

**4-(4-(*tert*-butyl)phenyl)-1-(4-nitrobenzyl)-1*H*-1,2,3-triazole (Table 3, Entry 19)** (0.26 g, 77%); white solid (crystals); mp 146-147 °C (from EtOH) (Lit.<sup>10</sup> 145–147 °C); elemental analysis Found: C, 67.67; H, 5.67; N, 16.92. Calc. for C<sub>19</sub>H<sub>20</sub>N<sub>4</sub>O<sub>2</sub>: C, 67.84; H, 5.99; N, 16.66%; FT-IR (KBr):  $\nu_{\max}/\text{cm}^{-1}$  3117, 3084, 2962, 2900, 2865, 1604, 1516, 1495, 1457 (CH<sub>2</sub>), 1346, 1220 (N=N=N-), 1109 (C-N), 1072, 1044, 976, 835 (=C-H oop, triazole ring), 782, 739, 723, 559; <sup>1</sup>H NMR:  $\delta$ H (300 MHz; CDCl<sub>3</sub>; Me<sub>4</sub>Si) 8.25 (2 H, d, *J* = 8.7 Hz, Ar-H), 7.77 (3 H, d, *J* = 7.8 Hz, Ar-H, C=CH), 7.48-7.43 (4 H, m, Ar-H), 5.72 (2 H, s, CH<sub>2</sub>), 1.36 (9 H, s, 3 CH<sub>3</sub>); <sup>13</sup>C NMR:  $\delta$ C (75 MHz; CDCl<sub>3</sub>; Me<sub>4</sub>Si) 151, 148.74, 148.08, 141, 128, 127, 125.64, 125.50, 124, 119, 53, 34, 31; MS, *m/z* 336 (M<sup>+</sup>, 5%), 335 (10, M - H), 334 (28, M - 2 H), 333 (48, M - 3 H), 332 (40, M - 4 H), 290 (20, M - NO<sub>2</sub>), 203 (17, M - C<sub>10</sub>H<sub>13</sub>), 171 (100, M - C<sub>7</sub>H<sub>6</sub>N<sub>3</sub>O<sub>2</sub>), 57 (83, M - C<sub>15</sub>H<sub>11</sub>N<sub>4</sub>O<sub>2</sub>), 28 (37, M - C<sub>19</sub>H<sub>20</sub>N<sub>2</sub>O<sub>2</sub>).

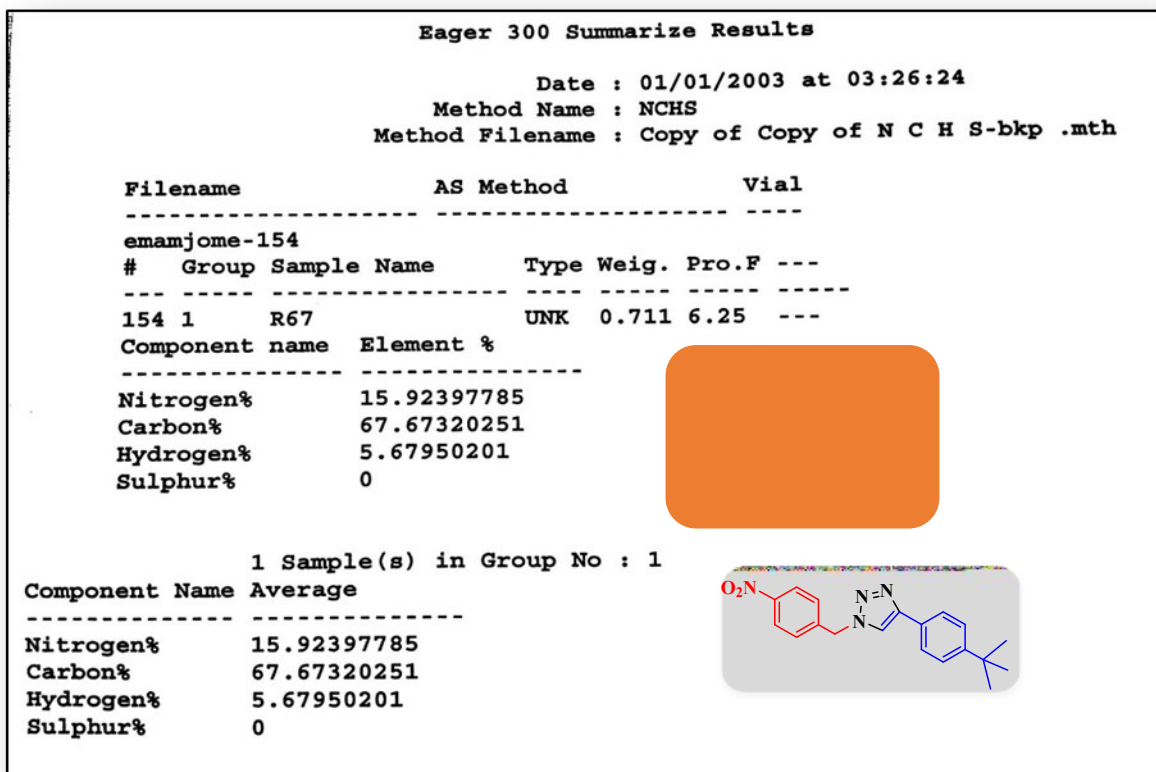

**Figure 62:** Elemental analysis of 4-(4-(*tert*-butyl)phenyl)-1-(4-nitrobenzyl)-1*H*-1,2,3-triazole (Table 3, Entry 19).

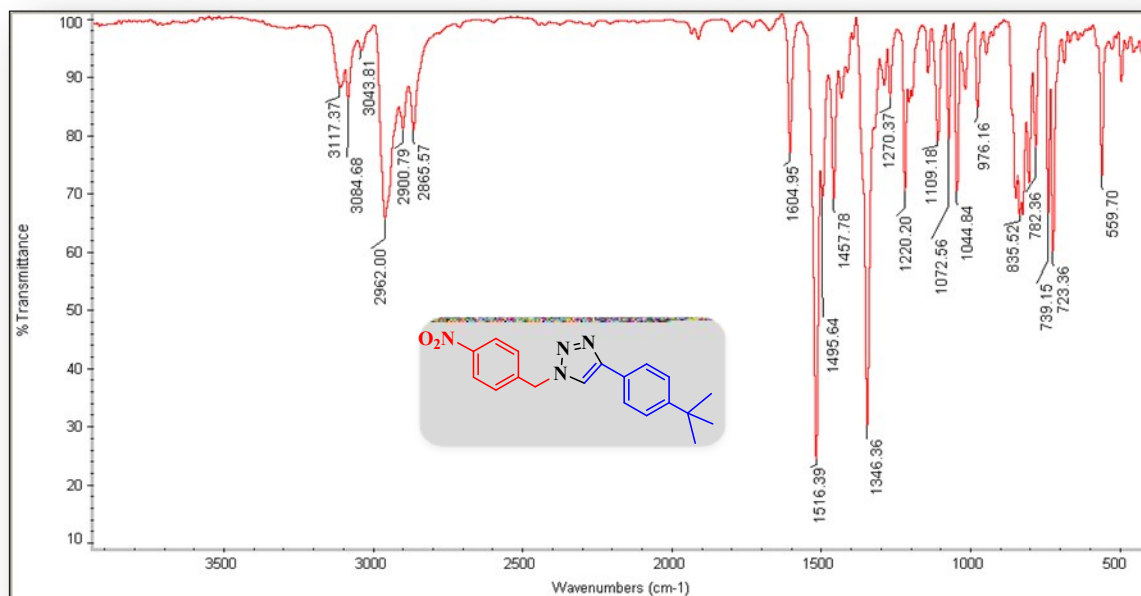

**Figure 63:** FT-IR (KBr) of 4-(4-(*tert*-butyl)phenyl)-1-(4-nitrobenzyl)-1*H*-1,2,3-triazole (Table 3, Entry 19).

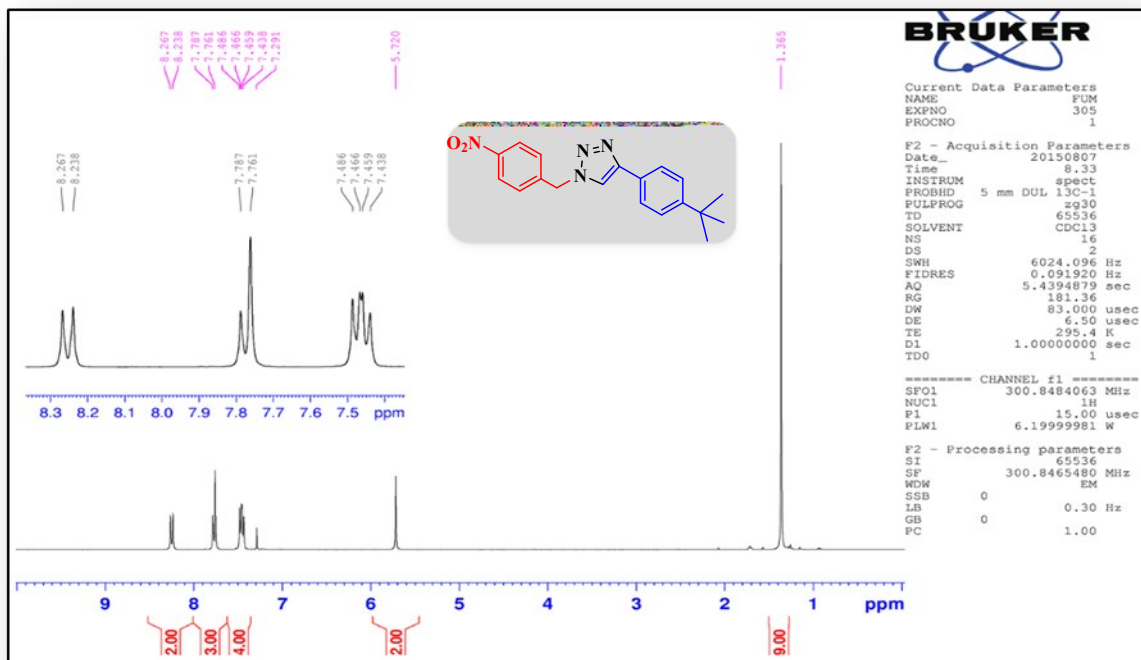

**Figure 64:** <sup>1</sup>H NMR (300 MHz, CDCl<sub>3</sub>) of 4-(4-(*tert*-butyl)phenyl)-1-(4-nitrobenzyl)-1*H*-1,2,3-triazole (Table 3, Entry 19).

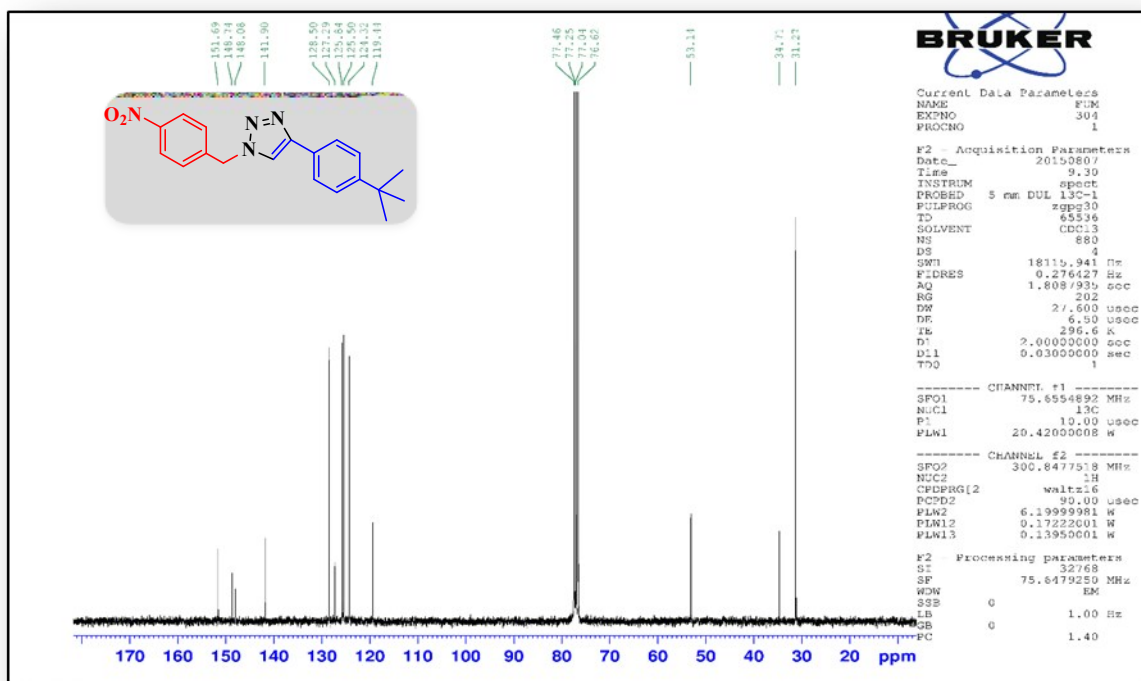

**Figure 65:** <sup>13</sup>C NMR (75 MHz, CDCl<sub>3</sub>) of 4-(4-(*tert*-butyl)phenyl)-1-(4-nitrobenzyl)-1*H*-1,2,3-triazole (Table 3, Entry 19).

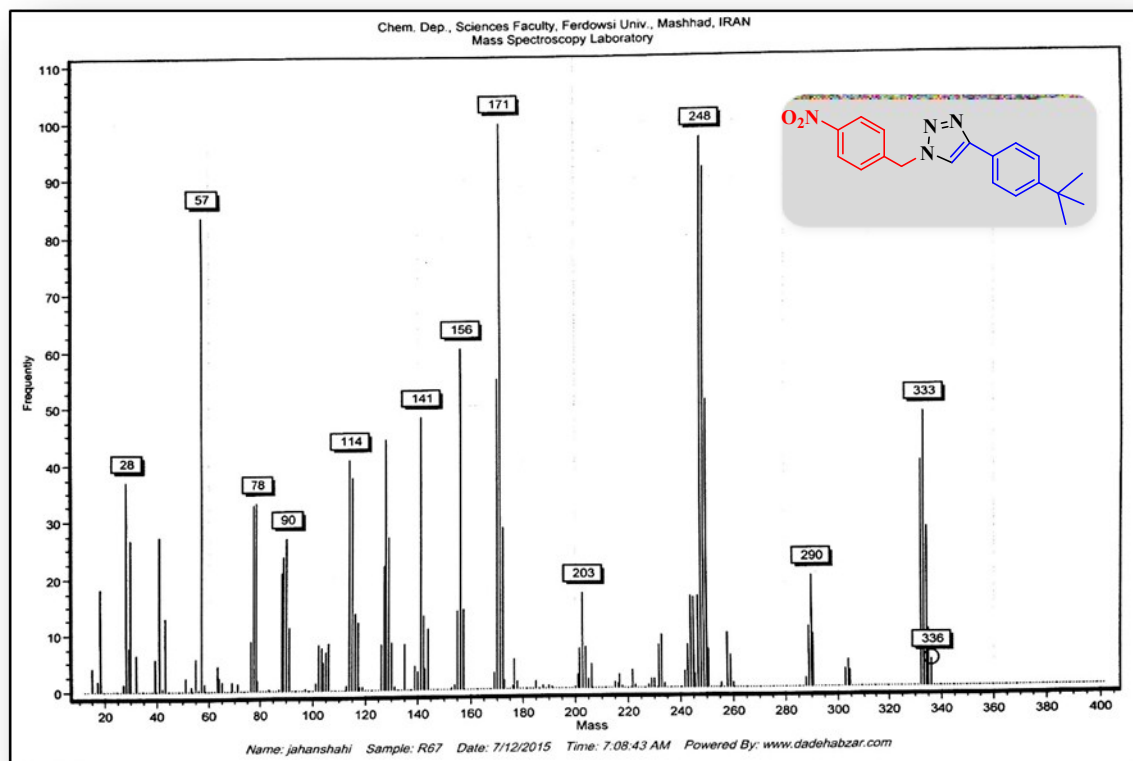

**Figure 66:** Mass spectrum of 4-(4-(*tert*-butyl)phenyl)-1-(4-nitrobenzyl)-1*H*-1,2,3-triazole (Table 3, Entry 19).

**2-(1-(4-nitrobenzyl)-1*H*-1,2,3-triazol-4-yl)pyridine** (Table 3, Entry 20) (0.20 g, 72%); yellow solid (crystals); mp 175–177 °C (from EtOH) (Lit.<sup>13</sup> 176–179 °C); 3114, 3088, 3056, 3007, 2851, 1603, 1511, 1469 (CH<sub>2</sub>), 1418, 1348, 1229 (N=N=N–), 1200, 1147 (C–N), 1078, 1046, 995, 859, 808 (=C–H oop, triazole ring), 786, 729, 510; MS, *m/z* 281 (M<sup>+</sup>, 5%), 280 (27, M – H), 278 (20, M – 3 H), 177 (10, M – C<sub>6</sub>H<sub>4</sub>N<sub>2</sub>), 130 (99, M – C<sub>7</sub>H<sub>6</sub>N<sub>2</sub>O<sub>2</sub>), 117 (100, M – C<sub>7</sub>H<sub>6</sub>N<sub>3</sub>O<sub>2</sub>), 103 (68, M – C<sub>7</sub>H<sub>6</sub>N<sub>4</sub>O<sub>2</sub>), 90 (96, M – (NO<sub>2</sub> + C<sub>7</sub>H<sub>5</sub>N<sub>4</sub>)), 78 (98, M – C<sub>9</sub>H<sub>7</sub>N<sub>4</sub>O<sub>2</sub>), 28 (74, M – C<sub>14</sub>H<sub>11</sub>N<sub>3</sub>O<sub>2</sub>).

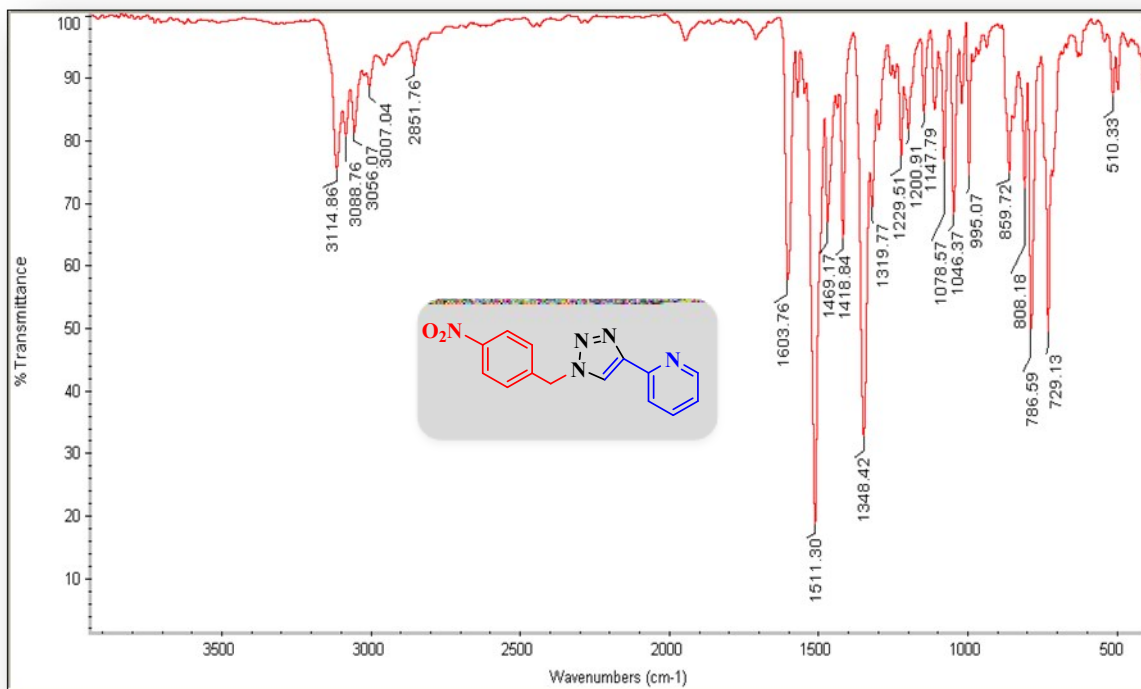

**Figure 67:** FT-IR (KBr) of 2-(1-(4-nitrobenzyl)-1H-1,2,3-triazol-4-yl)pyridine (Table 3, Entry 20).

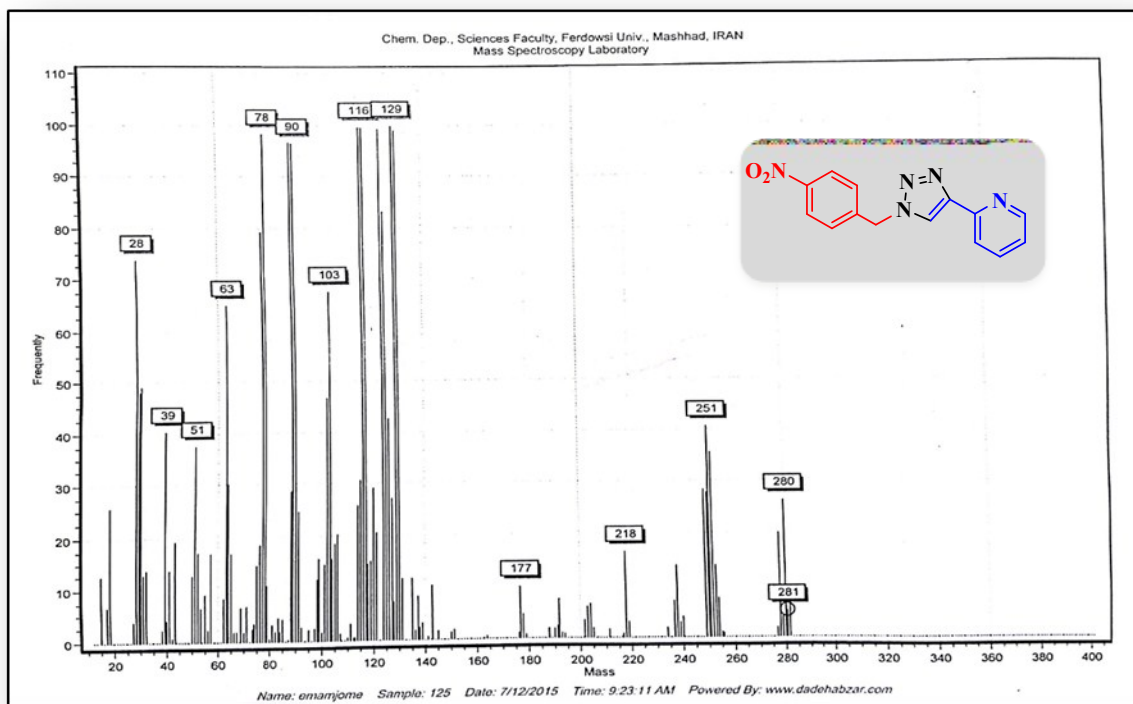

**Figure 68:** Mass spectrum of 2-(1-(4-nitrobenzyl)-1H-1,2,3-triazol-4-yl)pyridine (Table 3, Entry 20).



**1-allyl-4-phenyl-1H-1,2,3-triazole (Table 3, Entry 21)** (0.16 g, 90%); yellow (crystals); mp 40 °C (from EtOH) (Lit.<sup>14</sup> 40–41 °C); FT-IR (KBr):  $\nu_{\max}/\text{cm}^{-1}$  3131, 3084, 3035, 2953, 2924, 2853, 1642, 1609, 1485, 1464 (CH<sub>2</sub>), 1359, 1225 (N–N=N–), 1171 (C–N), 1045, 990, 913, 810 (=C–H oop, triazole ring), 763, 693, 517; MS,  $m/z$  185 (M<sup>+</sup>, 5%), 184 (38, M – H), 183 (27, M – 2 H), 116 (78, M – C<sub>3</sub>H<sub>5</sub>N<sub>2</sub>), 83 (75, M – C<sub>8</sub>H<sub>6</sub>), 69 (76, M – C<sub>8</sub>H<sub>6</sub>N), 55 (100, M – C<sub>8</sub>H<sub>6</sub>N<sub>2</sub>), 41 (77, M – C<sub>8</sub>H<sub>6</sub>N<sub>3</sub>), 28 (72, M – C<sub>11</sub>H<sub>11</sub>N).

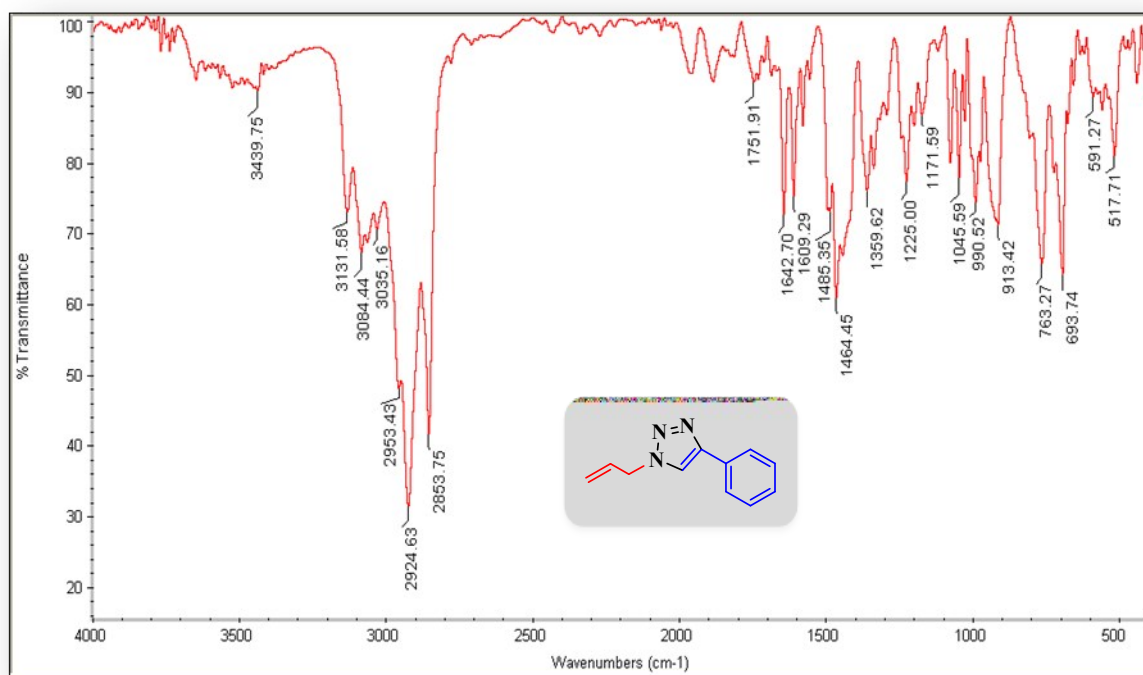

**Figure 69:** FT-IR (KBr) of 1-allyl-4-phenyl-1H-1,2,3-triazole (Table 3, Entry 21).

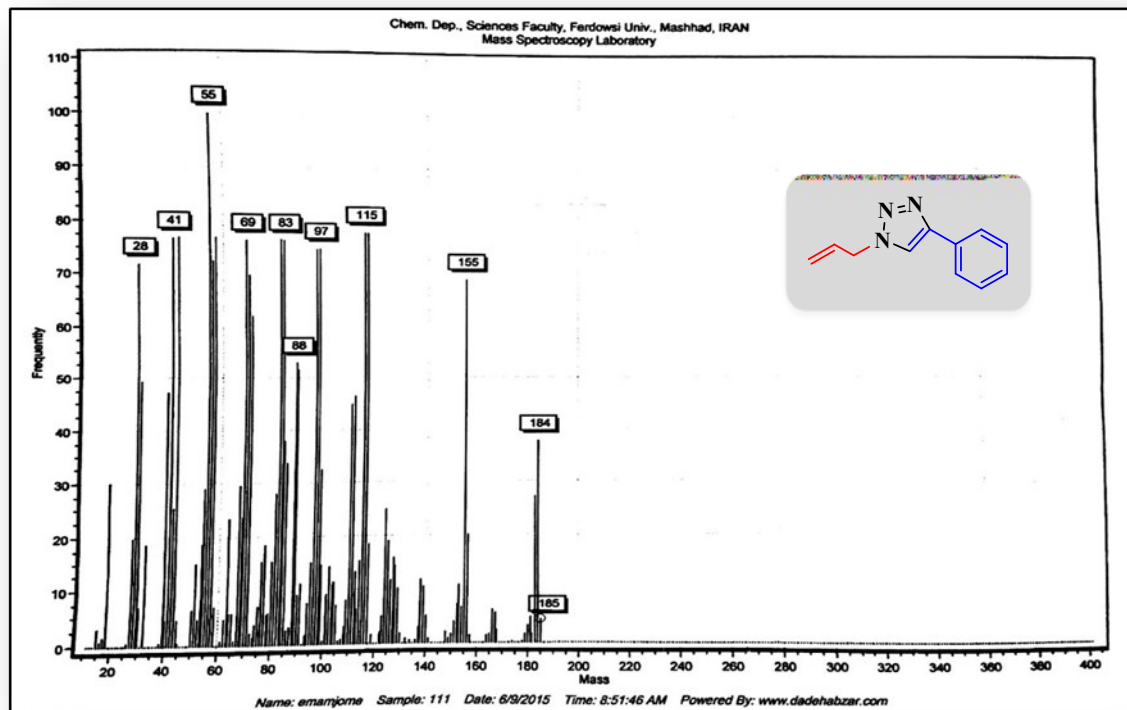

**Figure 70:** Mass spectrum of 1-allyl-4-phenyl-1H-1,2,3-triazole (Table 3, Entry 21).

**1-allyl-4-(*p*-tolyl)-1H-1,2,3-triazole**<sup>15</sup> (Table 3, Entry 22) (0.17 g, 85%); white solid (crystals); mp 82-84 °C (from EtOH); FT-IR (KBr):  $\nu_{\max}/\text{cm}^{-1}$  3125, 3106, 3027, 2978, 2917, 2859, 1642, 1497, 1451 (CH<sub>2</sub>), 1339, 1217 (N=N=N-), 1171 (C-N), 1071, 1048, 988, 933, 817 (=C-H oop, triazole ring), 768, 726, 519; <sup>1</sup>H NMR:  $\delta$ H (400 MHz; CDCl<sub>3</sub>; Me<sub>4</sub>Si) 7.73-7.67 (2 H, m, Ar-H, C=CH), 7.26-7.16 (3 H, m, Ar-H), 6.06-6.04 (1 H, m, C=CH), 5.40-5.33 (2 H, m, H<sub>2</sub>C=CH), 5.03-4.97 (2 H, m, CH<sub>2</sub>), 2.35 (3 H, d,  $J = 9.6$  Hz, CH<sub>3</sub>); MS,  $m/z$  199 (M<sup>+</sup>, 36%), 198 (76, M - H), 197 (75, M - 2 H), 170 (56, M - N<sub>2</sub>), 143 (36, M - C<sub>3</sub>H<sub>5</sub>N), 130 (87, M - C<sub>3</sub>H<sub>5</sub>N<sub>2</sub>), 103 (77, M - C<sub>4</sub>H<sub>6</sub>N<sub>3</sub>), 91 (39, M - C<sub>5</sub>H<sub>6</sub>N<sub>3</sub>), 77 (78, M - (CH<sub>3</sub> + C<sub>5</sub>H<sub>6</sub>N<sub>3</sub>)), 41 (73, M - C<sub>9</sub>H<sub>8</sub>N<sub>3</sub>), 28 (44, M - C<sub>12</sub>H<sub>13</sub>N).

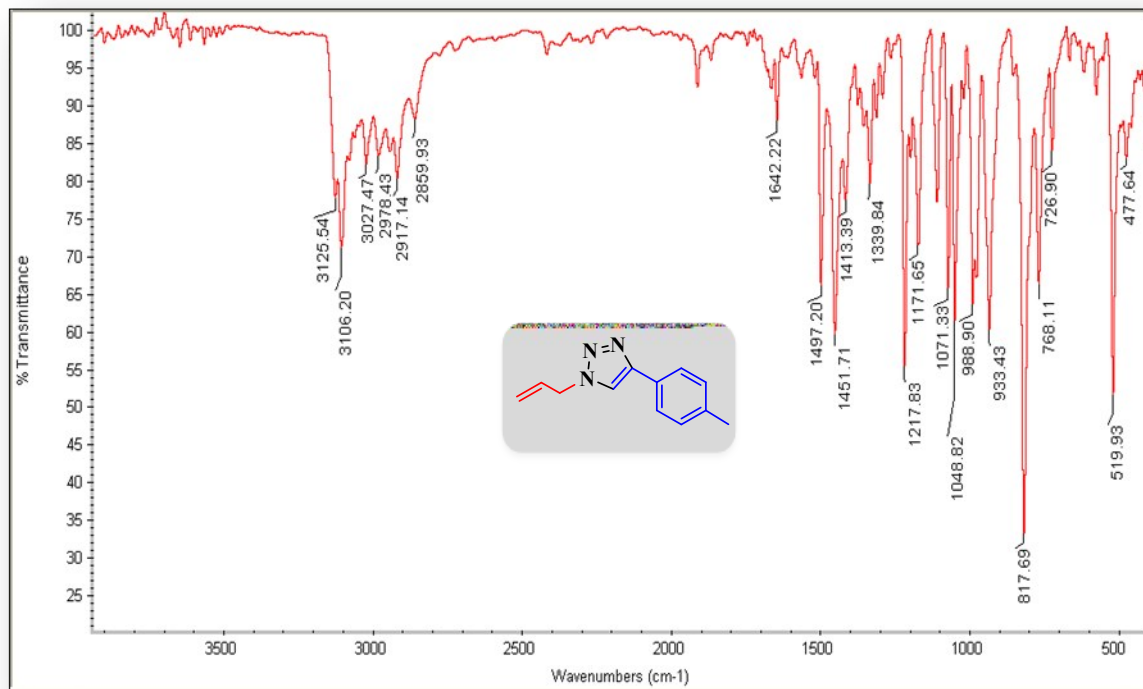

Figure 71: FT-IR (KBr) of 1-allyl-4-(*p*-tolyl)-1*H*-1,2,3-triazole (Table 3, Entry 22).

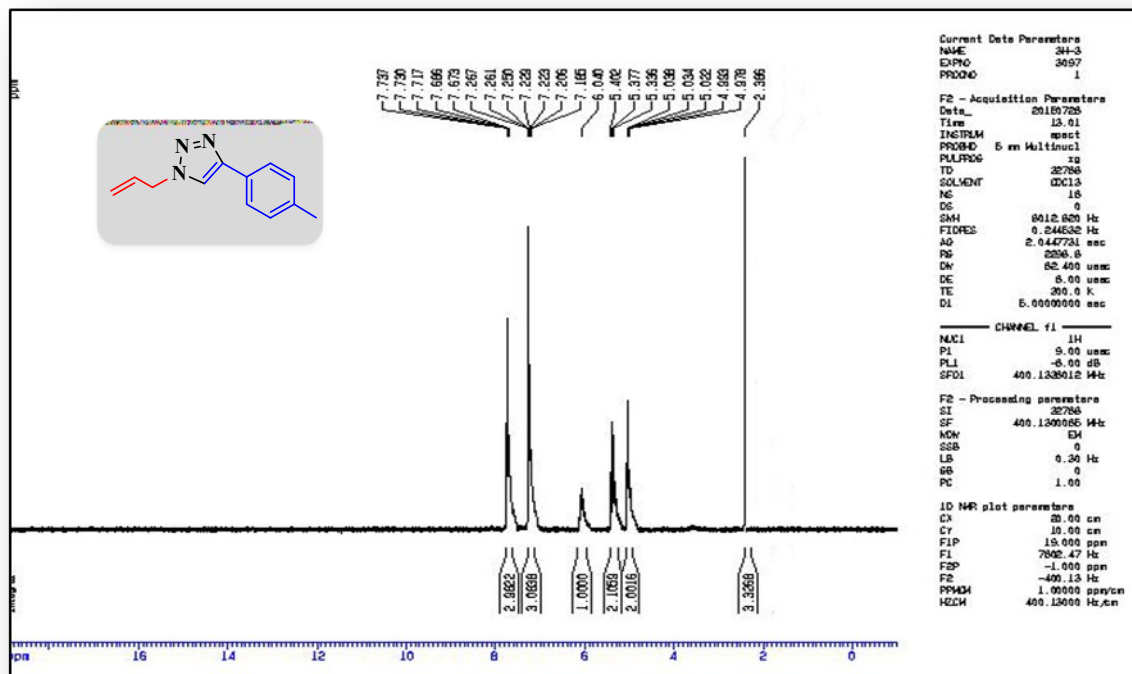

Figure 72: <sup>1</sup>H NMR (400 MHz, CDCl<sub>3</sub>) of 1-allyl-4-(*p*-tolyl)-1*H*-1,2,3-triazole (Table 3, Entry 22).

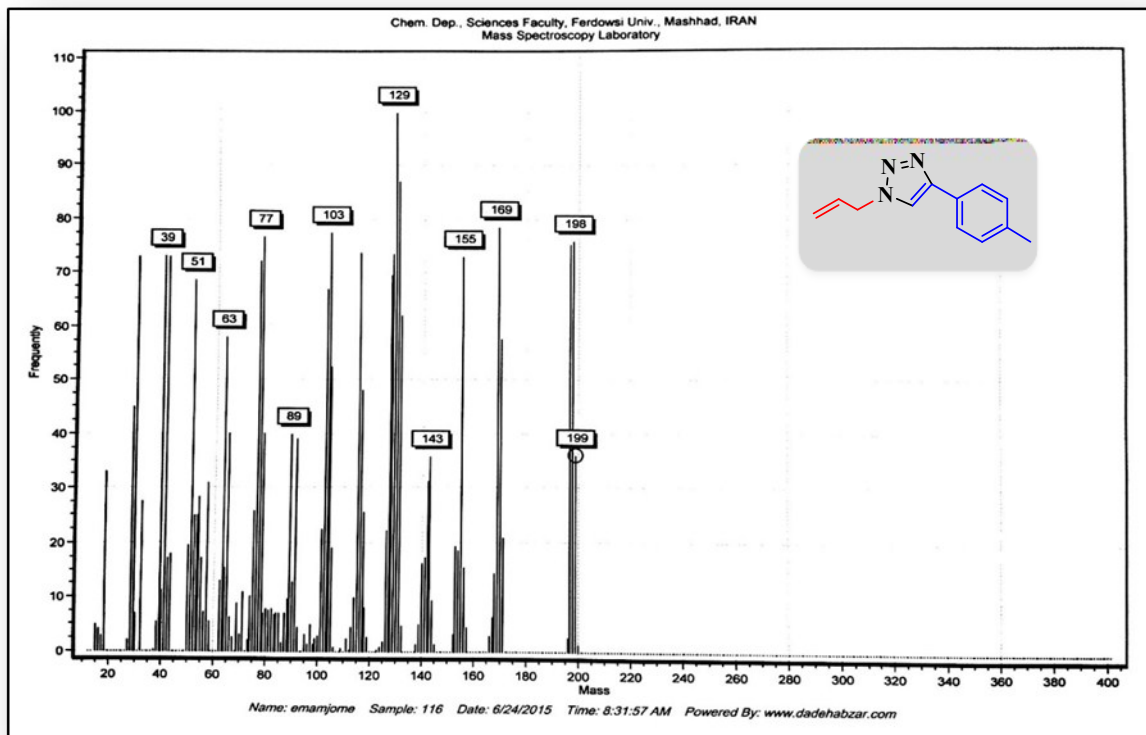

**Figure 73:** Mass spectrum of 1-allyl-4-(*p*-tolyl)-1*H*-1,2,3-triazole (Table 3, Entry 22).

**allyl-4-(4-methoxyphenyl)-1*H*-1,2,3-triazole** (Table 3, Entry 23) (0.18 g, 84%); white solid (crystals); mp 90–91 °C (from EtOH) (Lit.<sup>16</sup> 88–89 °C); FT-IR (KBr):  $\nu_{\max}/\text{cm}^{-1}$  3121, 3101, 3051, 2949, 2835, 1618, 1562, 1501, 1455 (CH<sub>2</sub>), 1303, 1250 (N–N=N–), 1218, 1175 (C–N), 1078, 1031, 976, 913, 823 (=C–H oop, triazole ring), 775, 620, 538; <sup>1</sup>H NMR:  $\delta$ H (300 MHz; CDCl<sub>3</sub>; Me<sub>4</sub>Si) 7.77 (2 H, d,  $J$  = 8.7 Hz, Ar-H), 7.0 (1 H, s, C=CH), 6.97 (2 H, d,  $J$  = 8.7 Hz, Ar-H), 6.14-6.01 (1 H, m, H<sub>2</sub>C=CH), 5.40-5.33 (2 H, m, H<sub>2</sub>C=CH), 5.02 (2 H, d,  $J$  = 6 Hz, CH<sub>2</sub>), 3.85 (3 H, s, CH<sub>3</sub>); <sup>13</sup>C NMR:  $\delta$ C (75 MHz; CDCl<sub>3</sub>; Me<sub>4</sub>Si) 159, 147, 131, 127, 123, 120, 118, 114, 55, 52; MS,  $m/z$  215 (M<sup>+</sup>, 4%), 214 (50, M – H), 213 (96, M – 2 H), 171 (68, M – CH<sub>2</sub>), 145 (100, M – C<sub>3</sub>H<sub>5</sub>), 131 (41, M – C<sub>3</sub>H<sub>5</sub>N), 117 (41, M – C<sub>4</sub>H<sub>6</sub>N), 103 (33, M – C<sub>3</sub>H<sub>5</sub>N<sub>3</sub>), 76 (38, M – C<sub>5</sub>H<sub>6</sub>N<sub>3</sub>), 41 (51, M – C<sub>8</sub>H<sub>6</sub>N<sub>3</sub>), 28 (100, M – C<sub>11</sub>H<sub>11</sub>N).

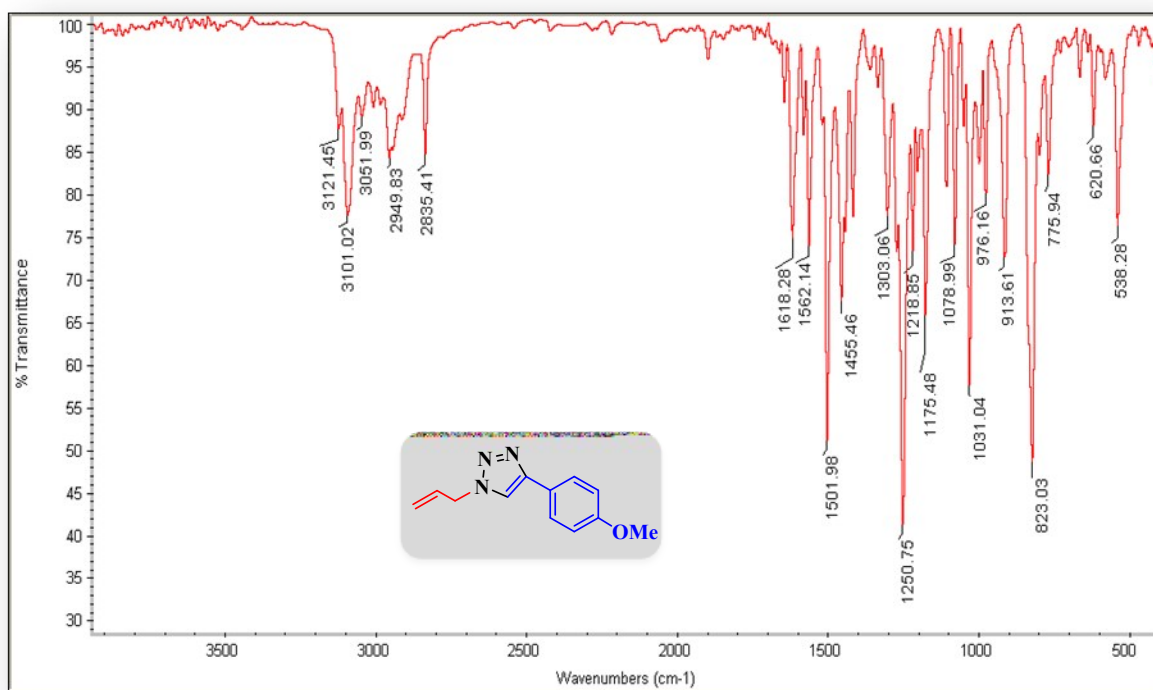

Figure 74: FT-IR (KBr) of 1-allyl-4-(4-methoxyphenyl)-1*H*-1,2,3-triazole (Table 3, Entry 23).

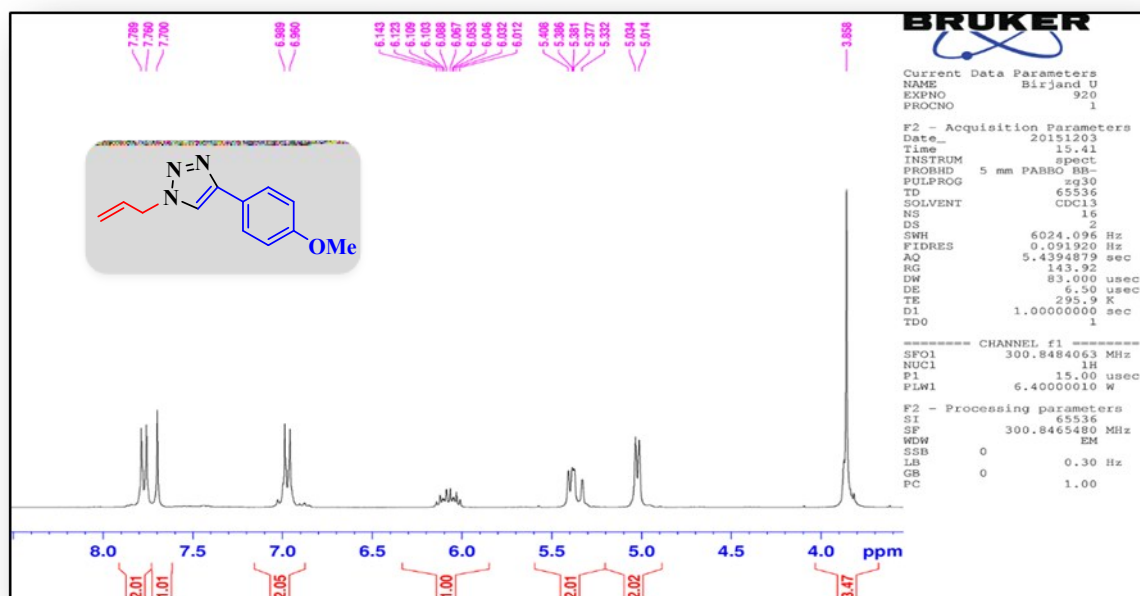

Figure 75:  $^1\text{H}$  NMR (300 MHz,  $\text{CDCl}_3$ ) of 1-allyl-4-(4-methoxyphenyl)-1*H*-1,2,3-triazole (Table 3, Entry 23).

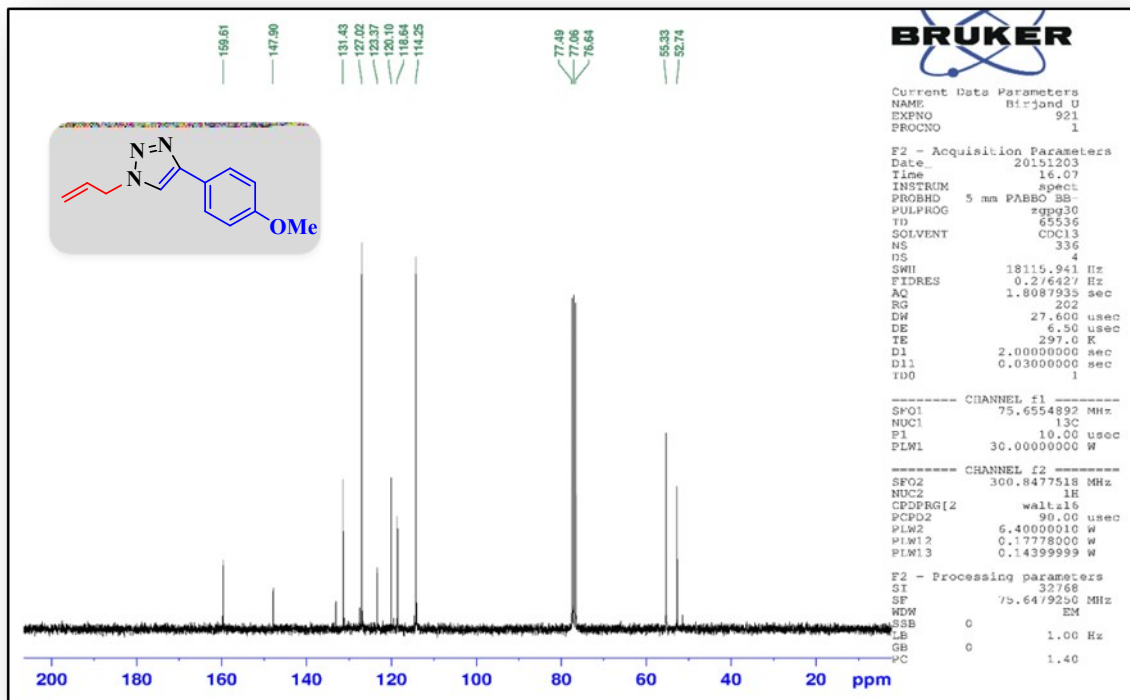

**Figure 76:**  $^{13}\text{C}$  NMR (75 MHz,  $\text{CDCl}_3$ ) of 1-allyl-4-(4-methoxyphenyl)-1*H*-1,2,3-triazole (Table 3, Entry 23).

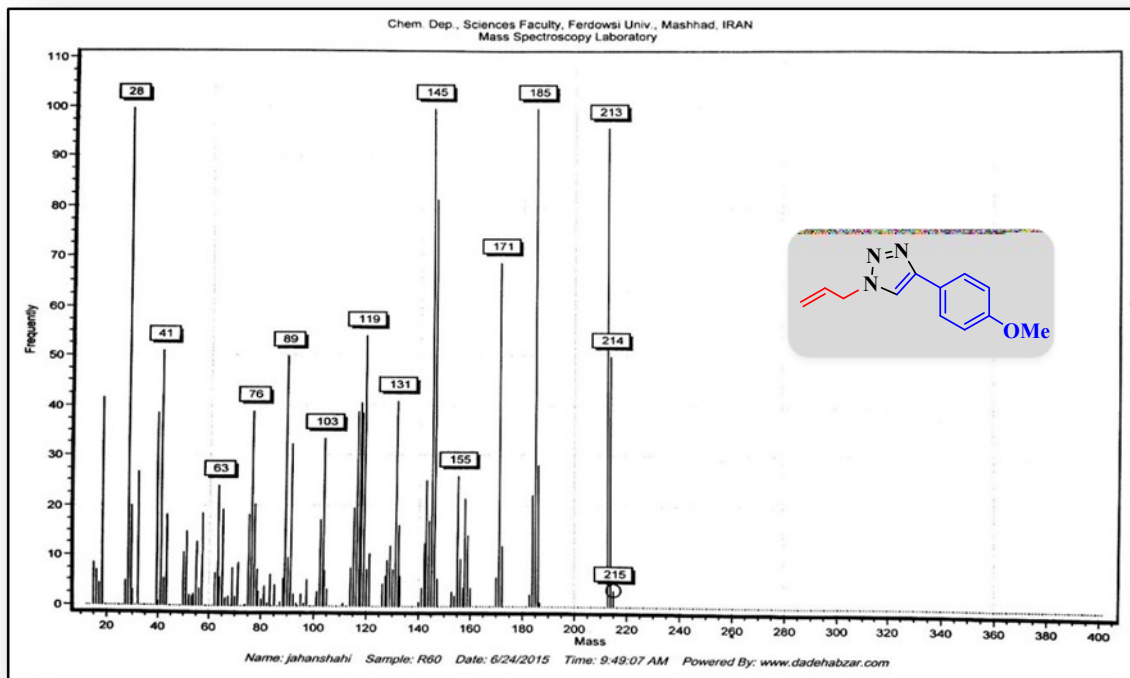

**Figure 77:** Mass spectrum of 1-allyl-4-(4-methoxyphenyl)-1*H*-1,2,3-triazole (Table 3, Entry 23).

**1-allyl-4-(4-(*tert*-butyl)phenyl)-1*H*-1,2,3-triazole<sup>15</sup>** (Table 3, Entry 24) (0.21 g, 93%); yellow (Oil); FT-IR (KBr):  $\nu_{\max}/\text{cm}^{-1}$  2960, 2903, 2866, 1486, 1459 (CH<sub>2</sub>), 1362, 1267 (N=N=N-), 1116 (C-N), 1021, 986, 834 (=C-H oop, triazole ring), 616, 561; MS,  $m/z$  241 (M<sup>+</sup>, 4%), 239 (16, M - 2 H), 172 (32, M - C<sub>3</sub>H<sub>5</sub>N<sub>2</sub>), 142 (46, M - (C<sub>3</sub>H<sub>5</sub> + C<sub>4</sub>H<sub>9</sub>)), 57 (41, M - C<sub>11</sub>H<sub>10</sub>N<sub>3</sub>), 41 (44, M - C<sub>12</sub>H<sub>14</sub>N<sub>3</sub>), 28 (51, M - C<sub>15</sub>H<sub>19</sub>N).

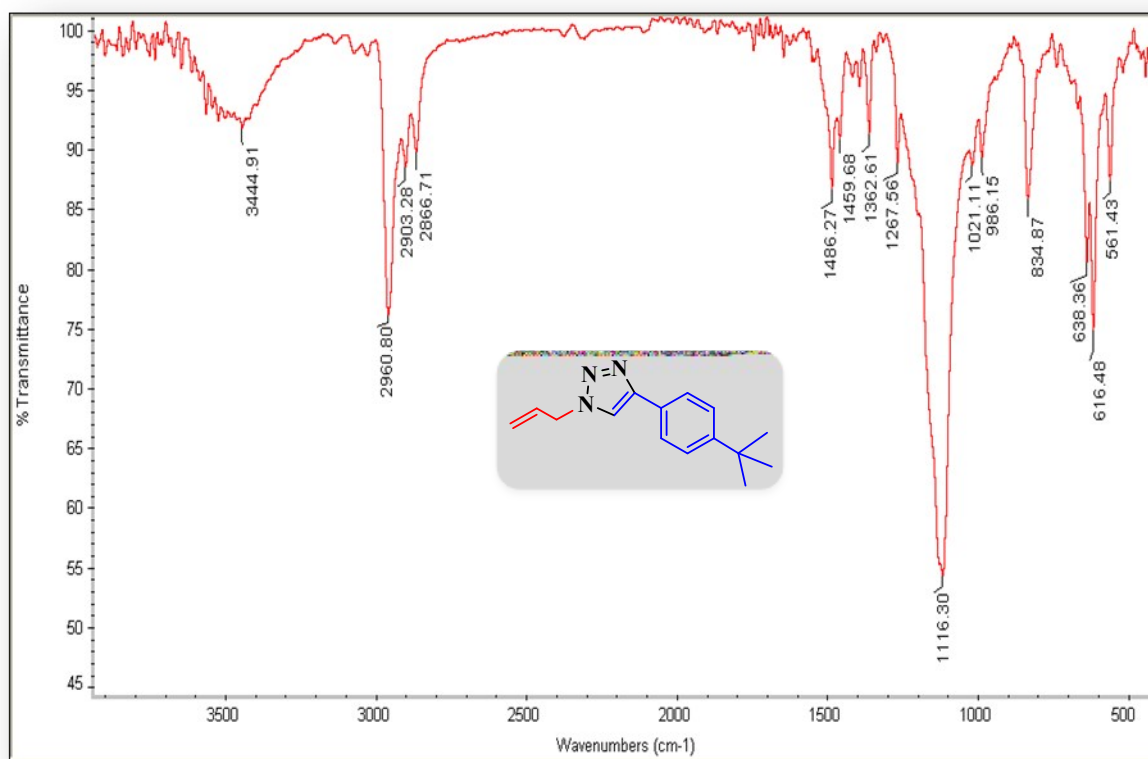

**Figure 78:** FT-IR (KBr) of 1-allyl-4-(4-(*tert*-butyl)phenyl)-1*H*-1,2,3-triazole (Table 3, Entry 24).

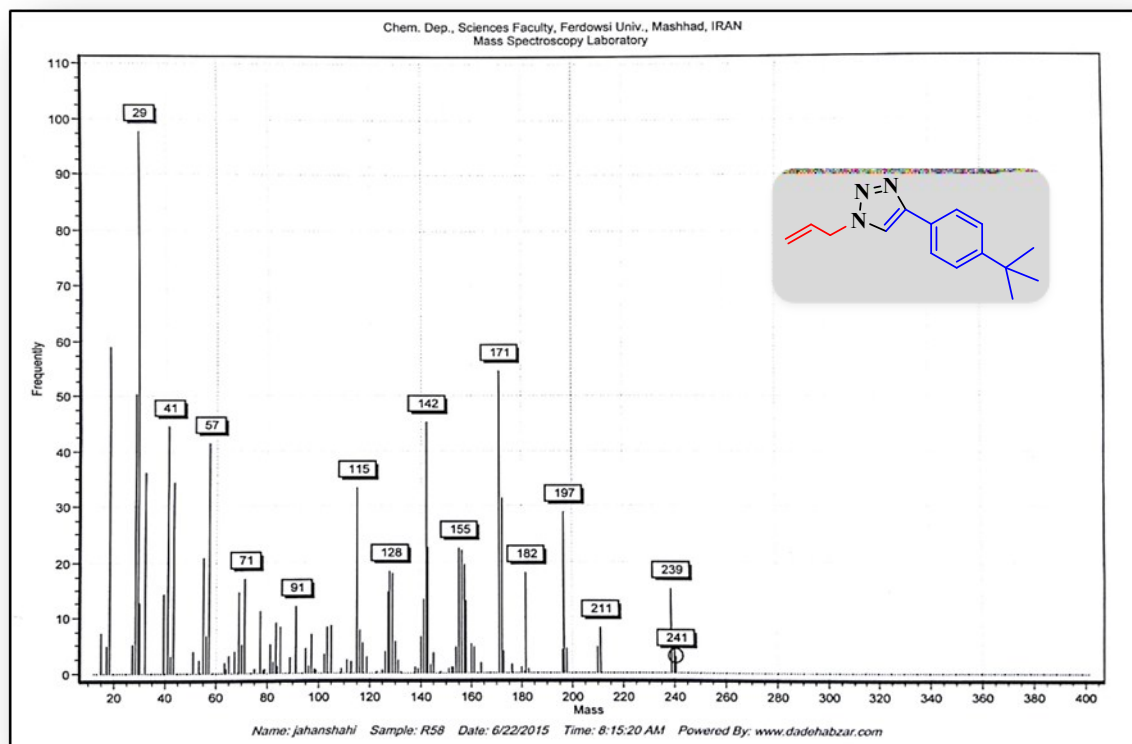

**Figure 79:** Mass spectrum of 1-allyl-4-(4-(*tert*-butyl)phenyl)-1*H*-1,2,3-triazole (Table 3, Entry 24).

**2-(4-phenyl-1*H*-1,2,3-triazol-1-yl)ethan-1-ol** (Table 3, Entry 25) (0.14 g, 76%); green solid (crystals); mp 87-91 °C (from EtOH) (Lit.<sup>17</sup> 89 - 92°C); <sup>1</sup>H NMR: δH (300 MHz; CDCl<sub>3</sub>; Me<sub>4</sub>Si) 7.74 (1 H, s, C=CH), 7.61 (2 H, d, *J* = 6.6 Hz, Ar-H), 7.46-7.37 (3 H, m, Ar-H), 4.81 (1 H, br s, OH), 4.44 (2 H, t, *J* = 6.0 Hz, H<sub>2</sub>C-CH<sub>2</sub>OH), 4.06 (2 H, t, *J* = 5.7 Hz, CH<sub>2</sub>OH); <sup>13</sup>C NMR: δC (75 MHz; CDCl<sub>3</sub>; Me<sub>4</sub>Si) 147, 129, 128.8, 128.2, 125, 121, 61, 52; MS, *m/z* 189 (M<sup>+</sup>, 4%), 188 (30, M - H), 172 (12, M - OH), 117 (86, M - C<sub>3</sub>H<sub>6</sub>NO), 116 (33, M - C<sub>2</sub>H<sub>5</sub>N<sub>2</sub>O), 102 (33, M - C<sub>2</sub>H<sub>5</sub>N<sub>3</sub>O), 77 (48, M - C<sub>4</sub>H<sub>6</sub>N<sub>3</sub>O), 45 (17, M - C<sub>8</sub>H<sub>6</sub>N<sub>3</sub>), 28 (55, M - C<sub>10</sub>H<sub>11</sub>NO), 17 (20, M - C<sub>10</sub>H<sub>10</sub>N<sub>3</sub>).



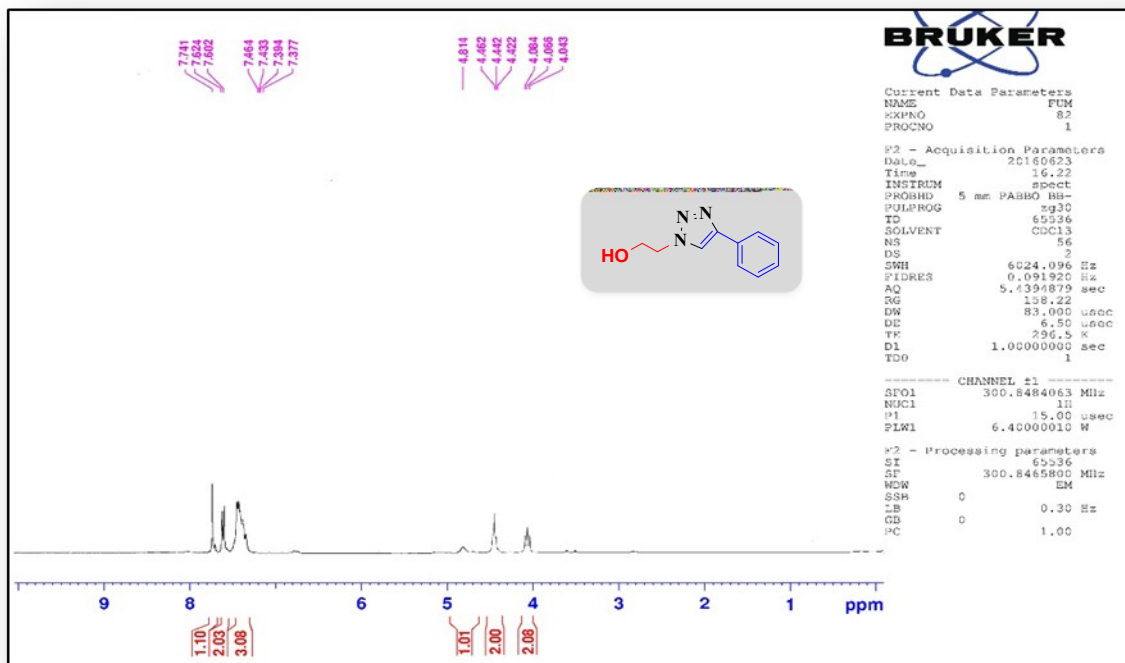

Figure 80:  $^1\text{H}$  NMR (300 MHz,  $\text{CDCl}_3$ ) of 2-(4-phenyl-1*H*-1,2,3-triazol-1-yl)ethan-1-ol (Table 3, Entry 25).

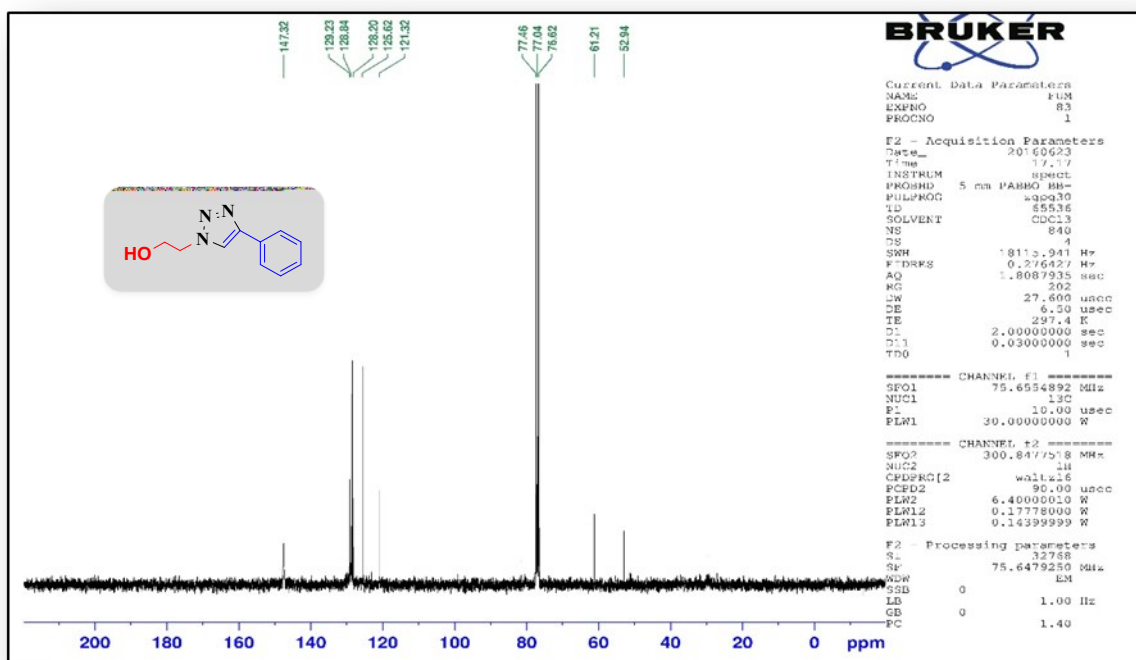

Figure 81:  $^{13}\text{C}$  NMR (300 MHz,  $\text{CDCl}_3$ ) of 2-(4-phenyl-1*H*-1,2,3-triazol-1-yl)ethan-1-ol (Table 3, Entry 25).

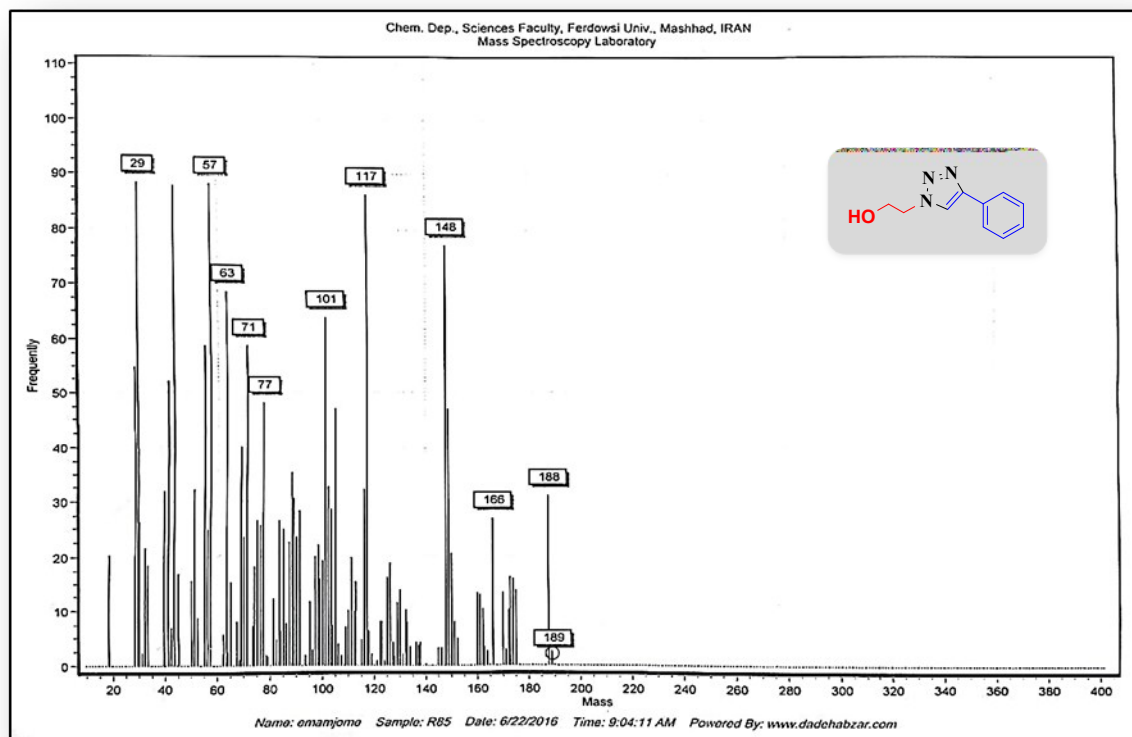

**Figure 82:** Mass spectrum of 2-(4-phenyl-1*H*-1,2,3-triazol-1-yl)ethan-1-ol (Table 3, Entry 25).

## References

- 1 S. Sun, R. Bai, Y. Gu, *Chem. Eur. J.*, 2014, **20**, 549.
- 2 P. V. Chavan, K. S. Pandit, U. V. Desai, M. A. Kulkarni, P. P. Wadgaonkar, *RSC Adv.*, 2014, **4** 42137.
- 3 P. N. Liu, H. X. Siyang, L. Zhang, S. K. S. Tse, G. Jia, *J. Org. Chem.*, 2012, **77**, 5844.
- 4 S. Koguchi, K. Nakamura, *Synlett*, 2013, **24**, 2305.
- 5 C. Richardson, C. M. Fitchett, F. R. Keene, P. J. Steel, *Dalton Trans.*, 2008, 2534.
- 6 J. M. Perez, R. Cano, D. J. Ramon, *RSC Adv.*, 2014, **4**, 23943.
- 7 J. Zuxi, X. Peng, F. Enqin, *Synth. Commun.*, 2014, **44**, 68.
- 8 J. Albadi, A. Alihosseinzadeh, A. Mansournezhad, *Acta Chim. Slov.*; 2015, **62**, 617-624.

- 9 J. T. Fletcher, M. E. Keeney, S. E. Walz, *Synthesis*, 2010, 3339 – 3345.
- 10 R. Jahanshahi and B. Akhlaghinia, *RSC Adv.*, 2016, **6**, 29210.
- 11 L. Huang, W. Liu, J. Wu, Y. Fu, K. Wang, C. Huo, Z. Du, *Tetrahedron Lett.*, 2014, **55**, 2312.
- 12 Y. Jiang, D. Kong, J. Zhao, W. Zhang, W. Xu, W. Li, G. Xu, *Tetrahedron Lett.*, 2014, **55**, 2410.
- 13 N. Joshi, S. Banerjee, *Tetrahedron Lett.*, 2015, **56**, 4163.
- 14 M. Gupta, M. Gupta, S. Paul, R. Kant, V. K. Gupta, *Monatsh. Chem.*, 2015, **146**, 143.
- 15 E. Tasca, S. G. La, L. Sporni, G. Strukul, A. Scarso, *Green Chem.*, 2015, **17**, 1414.
- 16 S. Kamijo, T. Jin, Z. Huo, Y. Yamamoto, *J. Org. Chem.*, 2004, **69**, 2386.
- 17 R. Romeo, S. V. Giofre, C. Carnovale, A. Campisi, R. Parenti, L. Bandini, M. A. Chiacchio, *Bioorg. Med. Chem.*, 2013, **21**, 7929 -7937.
